# Supplementary material
Source: PubMed Central journal article supplement (PMC6956732)

Supplemental Data 1-3. Regional association plots (1), forest plots for discovery GWAS studies (2) and forest plots for follow-up studies (3), for all 31 lead SNPs in the 30 genome-wide significant loci. Each multi-figure PDF below is a separate supplemental data piece.

Supplemental Data 1. Regional association plots.

Supplemental Data 2. Forest plots of the 32 primary GWAS datasets.

Supplemental Data 3. Forest plots of the 7 followup datasets.



rs6130764 T/C 20:43750410  
 ++++++-----+  
 het\_P: 0.721 het\_I: 0.0

|                 | ngt | info | p_value | f_ca(n)     | f_co(n)     | ln(OR)  | STDerr |
|-----------------|-----|------|---------|-------------|-------------|---------|--------|
| bip_bmau_eur    | 0   | 0.97 | 0.654   | 0.572(329)  | 0.563(1810) | 0.0392  | 0.0875 |
| bip_bmg2_eur    | 0   | 1.04 | 0.355   | 0.614(181)  | 0.557(479)  | 0.143   | 0.155  |
| bip_bmg3_eur    | 0   | 0.99 | 0.873   | 0.589(490)  | 0.591(880)  | -0.0133 | 0.0826 |
| bip_bmpo_eur    | 0   | 0.96 | 0.989   | 0.587(410)  | 0.594(689)  | -0.0013 | 0.0947 |
| bip_bmsp_eur    | 0   | 1.08 | 0.703   | 0.565(253)  | 0.551(291)  | 0.0469  | 0.123  |
| bip_bonn_eur    | 0   | 1.02 | 0.18    | 0.601(674)  | 0.583(1245) | 0.0939  | 0.0702 |
| bip_dub1_eur    | 1   | 1.04 | 0.345   | 0.590(150)  | 0.560(796)  | 0.119   | 0.126  |
| bip_ed1_eur     | 0   | 0.84 | 0.455   | 0.598(280)  | 0.579(275)  | 0.102   | 0.137  |
| bip_fat2_eur    | 1   | 1.01 | 0.904   | 0.589(728)  | 0.582(1106) | 0.00846 | 0.0698 |
| bip_fran_eur    | 0   | 0.97 | 0.146   | 0.590(451)  | 0.560(1630) | 0.114   | 0.0782 |
| bip_gain_eur    | 1   | 0.99 | 0.0331  | 0.601(703)  | 0.558(603)  | 0.172   | 0.0808 |
| bip_gsk1_eur    | 0   | 0.99 | 0.421   | 0.586(741)  | 0.572(901)  | 0.0576  | 0.0715 |
| bip_hal2_eur    | 0   | 0.97 | 0.087   | 0.594(410)  | 0.553(485)  | 0.169   | 0.0988 |
| bip_icuk_eur    | 0   | 0.98 | 0.428   | 0.580(2524) | 0.571(4106) | 0.0291  | 0.0367 |
| bip_jst5_eur    | 0   | 1.00 | 0.584   | 0.572(644)  | 0.561(624)  | 0.0442  | 0.0806 |
| bip_may1_eur    | 0   | 0.99 | 0.618   | 0.562(934)  | 0.572(759)  | -0.0358 | 0.0718 |
| bip_mich_eur    | 0   | 1.01 | 0.801   | 0.574(486)  | 0.585(436)  | -0.0241 | 0.0954 |
| bip_pf1e_eur    | 0   | 1.04 | 0.00253 | 0.630(378)  | 0.548(339)  | 0.332   | 0.11   |
| bip_rom3_eur    | 0   | 1.00 | 0.362   | 0.588(233)  | 0.559(198)  | 0.128   | 0.14   |
| bip_st2c_eur    | 0   | 0.93 | 0.566   | 0.580(634)  | 0.566(1216) | 0.0427  | 0.0743 |
| bip_stp1_eur    | 0   | 0.97 | 0.762   | 0.573(920)  | 0.579(999)  | -0.0205 | 0.0677 |
| bip_swa2_eur    | 0   | 0.98 | 0.593   | 0.587(884)  | 0.580(2257) | 0.0316  | 0.0591 |
| bip_swei_eur    | 0   | 0.96 | 0.0267  | 0.588(1283) | 0.562(3657) | 0.106   | 0.0479 |
| bip_top7_eur    | 1   | 1.01 | 0.566   | 0.576(449)  | 0.560(373)  | 0.058   | 0.101  |
| bip_top8_eur    | 0   | 1.11 | 0.372   | 0.588(149)  | 0.548(293)  | 0.124   | 0.139  |
| bip_ucl2_eur    | 0   | 0.99 | 0.458   | 0.602(726)  | 0.586(693)  | 0.0574  | 0.0773 |
| bip_ucl0_eur    | 0   | 0.97 | 0.0391  | 0.591(441)  | 0.544(495)  | 0.198   | 0.0961 |
| bip_ume4_eur    | 0   | 1.00 | 0.52    | 0.586(568)  | 0.573(569)  | 0.0547  | 0.085  |
| bip_usc2_eur    | 0   | 1.00 | 0.025   | 0.592(1297) | 0.565(1156) | 0.133   | 0.0594 |
| bip_wtcc_eur    | 0   | 0.95 | 0.00573 | 0.592(1636) | 0.557(1632) | 0.143   | 0.0519 |
| ms.bip_butr_eur | 0   | 0.94 | 0.815   | 0.579(236)  | 0.586(236)  | -0.0318 | 0.136  |
| ms.bip_uktr_eur | 0   | 0.98 | 0.518   | 0.568(130)  | 0.595(130)  | -0.116  | 0.179  |

PGC\_BIP32b\_mds7a 4 0.98 5.78e-07 0.586(20352) 0.569(31358) 0.0681 0.0136

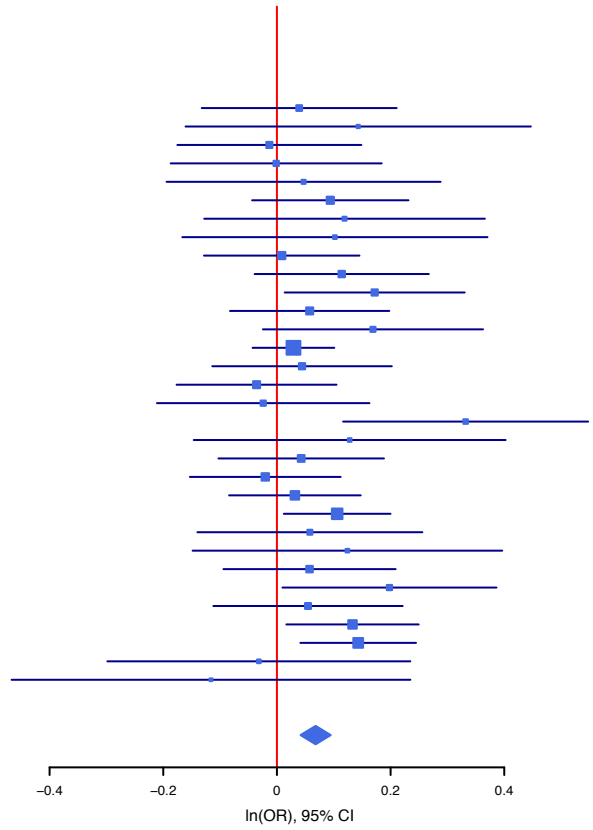

rs4447398 A/C 15:42904904  
 ++++++----+++++-----  
 het\_P: 0.79 het\_I: 0.0

|                         | ngt      | info        | p_value        | f_ca(n)             | f_co(n)             | ln(OR)       | STDerr      |
|-------------------------|----------|-------------|----------------|---------------------|---------------------|--------------|-------------|
| bip_bmau_eur            | 0        | 1.04        | 0.231          | 0.157(329)          | 0.139(1810)         | 0.138        | 0.116       |
| bip_bmg2_eur            | 0        | 0.97        | 0.701          | 0.127(181)          | 0.138(479)          | -0.0864      | 0.225       |
| bip_bmg3_eur            | 0        | 0.98        | 0.558          | 0.124(490)          | 0.132(880)          | -0.0718      | 0.123       |
| bip_bmpo_eur            | 0        | 1.00        | 0.117          | 0.129(410)          | 0.100(689)          | 0.225        | 0.144       |
| bip_bmsp_eur            | 0        | 1.00        | 0.159          | 0.135(253)          | 0.098(291)          | 0.28         | 0.199       |
| bip_bonn_eur            | 0        | 0.99        | 0.447          | 0.139(674)          | 0.134(1245)         | 0.0766       | 0.101       |
| bip_dub1_eur            | 0        | 0.93        | 0.582          | 0.118(150)          | 0.129(796)          | -0.111       | 0.202       |
| bip_edi1_eur            | 0        | 0.94        | 0.212          | 0.158(280)          | 0.138(275)          | 0.224        | 0.179       |
| bip_fat2_eur            | 0        | 1.06        | 0.115          | 0.145(728)          | 0.126(1106)         | 0.153        | 0.0975      |
| bip_fran_eur            | 0        | 1.03        | 0.518          | 0.133(451)          | 0.121(1630)         | 0.0719       | 0.111       |
| bip_gain_eur            | 0        | 1.00        | 0.243          | 0.144(703)          | 0.127(603)          | 0.136        | 0.116       |
| bip_gsk1_eur            | 0        | 0.97        | 0.0878         | 0.148(741)          | 0.128(901)          | 0.177        | 0.104       |
| bip_hal2_eur            | 0        | 0.90        | 0.0746         | 0.149(410)          | 0.123(485)          | 0.264        | 0.148       |
| bip_icuk_eur            | 0        | 0.93        | 0.000263       | 0.136(2524)         | 0.115(4106)         | 0.205        | 0.0561      |
| bip_jst5_eur            | 0        | 0.95        | 0.278          | 0.135(644)          | 0.121(624)          | 0.133        | 0.123       |
| bip_may1_eur            | 0        | 1.00        | 0.201          | 0.147(934)          | 0.126(759)          | 0.133        | 0.104       |
| bip_mich_eur            | 0        | 0.99        | 0.816          | 0.139(486)          | 0.137(436)          | 0.0321       | 0.138       |
| bip_pf1e_eur            | 0        | 0.95        | 0.602          | 0.142(378)          | 0.127(339)          | 0.0857       | 0.165       |
| bip_rom3_eur            | 0        | 1.00        | 0.244          | 0.187(233)          | 0.158(198)          | 0.216        | 0.185       |
| bip_st2c_eur            | 0        | 0.99        | 0.982          | 0.144(634)          | 0.141(1216)         | 0.0024       | 0.102       |
| bip_stp1_eur            | 0        | 0.97        | 0.0533         | 0.145(920)          | 0.125(999)          | 0.189        | 0.0977      |
| bip_swa2_eur            | 0        | 0.99        | 0.336          | 0.108(884)          | 0.119(2257)         | -0.0884      | 0.092       |
| bip_swei_eur            | 0        | 0.98        | 0.355          | 0.117(1283)         | 0.110(3657)         | 0.0678       | 0.0732      |
| bip_top7_eur            | 0        | 0.98        | 0.114          | 0.119(449)          | 0.092(373)          | 0.265        | 0.168       |
| bip_top8_eur            | 0        | 0.94        | 0.947          | 0.120(149)          | 0.120(293)          | 0.0151       | 0.228       |
| bip_ucl2_eur            | 0        | 0.98        | 0.0659         | 0.142(726)          | 0.118(693)          | 0.21         | 0.114       |
| bip_ucl0_eur            | 0        | 1.00        | 0.707          | 0.143(441)          | 0.136(495)          | 0.0505       | 0.135       |
| bip_ume4_eur            | 0        | 0.99        | 0.123          | 0.117(568)          | 0.097(569)          | 0.212        | 0.138       |
| bip_usc2_eur            | 0        | 1.02        | 0.432          | 0.144(1297)         | 0.136(1156)         | 0.0654       | 0.0832      |
| bip_wtcc_eur            | 0        | 1.01        | 0.912          | 0.132(1636)         | 0.132(1632)         | -0.00813     | 0.0735      |
| ms.bip_buttr_eur        | 0        | 0.96        | 0.922          | 0.153(236)          | 0.151(236)          | 0.0182       | 0.185       |
| ms.bip_uktr_eur         | 0        | 0.89        | 0.279          | 0.111(130)          | 0.085(130)          | 0.342        | 0.316       |
| <b>PGC_BIP32b_mds7a</b> | <b>0</b> | <b>0.98</b> | <b>1.1e-07</b> | <b>0.136(20352)</b> | <b>0.123(31358)</b> | <b>0.106</b> | <b>0.02</b> |

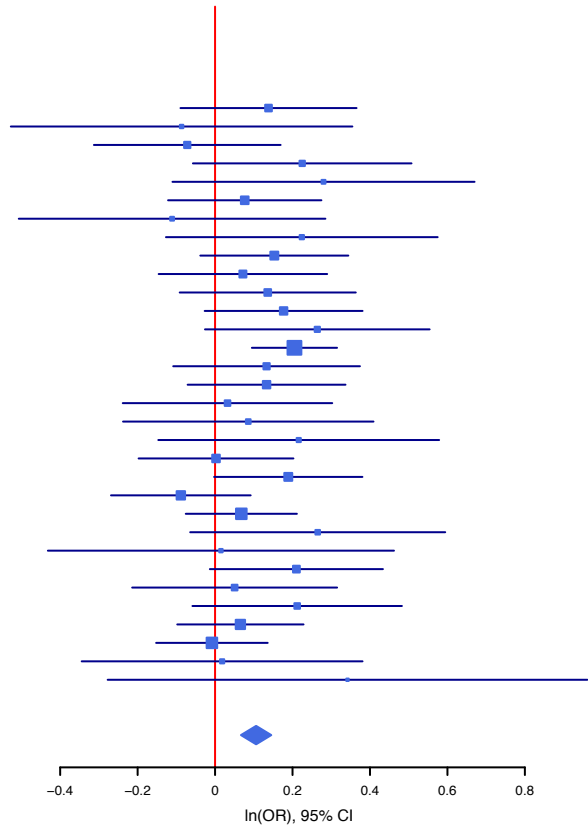

rs11724116 T/C 4:162294038  
het\_P: 0.141 het\_I: 16.5

|                         | ngt      | info        | p_value         | f_ca(n)             | f_co(n)             | ln(OR)        | STDerr        |
|-------------------------|----------|-------------|-----------------|---------------------|---------------------|---------------|---------------|
| bip_bmau_eur            | 0        | 0.99        | 0.963           | 0.140(329)          | 0.141(1810)         | -0.00572      | 0.124         |
| bip_bmg2_eur            | 0        | 0.96        | 0.173           | 0.132(181)          | 0.172(479)          | -0.299        | 0.22          |
| bip_bmg3_eur            | 0        | 0.95        | 0.636           | 0.149(490)          | 0.151(880)          | -0.0548       | 0.116         |
| bip_bmpo_eur            | 0        | 1.01        | 0.177           | 0.160(410)          | 0.187(689)          | -0.165        | 0.122         |
| bip_bmsp_eur            | 0        | 0.96        | 0.689           | 0.107(253)          | 0.114(291)          | -0.0821       | 0.205         |
| bip_bonn_eur            | 0        | 1.00        | 0.0164          | 0.154(674)          | 0.183(1245)         | -0.226        | 0.0941        |
| bip_dub1_eur            | 0        | 0.97        | 0.359           | 0.128(150)          | 0.148(796)          | -0.176        | 0.192         |
| bip_edi1_eur            | 0        | 0.93        | 0.669           | 0.138(280)          | 0.142(275)          | -0.0784       | 0.183         |
| bip_fat2_eur            | 0        | 0.94        | 0.122           | 0.148(728)          | 0.164(1106)         | -0.153        | 0.0991        |
| bip_fran_eur            | 0        | 0.93        | 0.368           | 0.137(451)          | 0.147(1630)         | -0.102        | 0.114         |
| bip_gain_eur            | 0        | 0.97        | 0.193           | 0.146(703)          | 0.162(603)          | -0.145        | 0.111         |
| bip_gsk1_eur            | 0        | 0.98        | 0.859           | 0.147(741)          | 0.151(901)          | -0.0178       | 0.1           |
| bip_hal2_eur            | 0        | 0.90        | 0.995           | 0.150(410)          | 0.150(485)          | -0.001        | 0.141         |
| bip_icuk_eur            | 0        | 0.98        | 0.648           | 0.149(2524)         | 0.151(4106)         | -0.0233       | 0.051         |
| bip_jst5_eur            | 0        | 0.99        | 0.0595          | 0.149(644)          | 0.177(624)          | -0.206        | 0.109         |
| bip_may1_eur            | 0        | 0.97        | 0.46            | 0.163(934)          | 0.154(759)          | 0.0725        | 0.0982        |
| bip_mich_eur            | 0        | 1.05        | 8.65e-05        | 0.135(486)          | 0.201(436)          | -0.5          | 0.128         |
| bip_pf1e_eur            | 0        | 0.92        | 0.321           | 0.145(378)          | 0.158(339)          | -0.157        | 0.158         |
| bip_rom3_eur            | 0        | 0.98        | 0.171           | 0.167(233)          | 0.136(198)          | 0.27          | 0.198         |
| bip_st2c_eur            | 0        | 0.95        | 0.0788          | 0.134(634)          | 0.144(1216)         | -0.187        | 0.107         |
| bip_stp1_eur            | 0        | 0.92        | 0.192           | 0.151(920)          | 0.167(999)          | -0.123        | 0.0943        |
| bip_swa2_eur            | 0        | 0.92        | 0.132           | 0.154(884)          | 0.173(2257)         | -0.124        | 0.0822        |
| bip_swei_eur            | 0        | 0.99        | 0.226           | 0.162(1283)         | 0.171(3657)         | -0.0761       | 0.0629        |
| bip_top7_eur            | 0        | 0.94        | 0.0658          | 0.156(449)          | 0.188(373)          | -0.254        | 0.138         |
| bip_top8_eur            | 0        | 0.99        | 0.172           | 0.206(149)          | 0.169(293)          | 0.251         | 0.184         |
| bip_ucl2_eur            | 0        | 1.01        | 0.00984         | 0.143(726)          | 0.178(693)          | -0.266        | 0.103         |
| bip_ucl0_eur            | 0        | 0.93        | 0.846           | 0.159(441)          | 0.154(495)          | 0.0259        | 0.133         |
| bip_ume4_eur            | 0        | 0.93        | 0.589           | 0.157(568)          | 0.165(569)          | -0.0644       | 0.119         |
| bip_usc2_eur            | 0        | 1.00        | 0.0745          | 0.143(1297)         | 0.166(1156)         | -0.145        | 0.0813        |
| bip_wtcc_eur            | 0        | 0.97        | 0.0109          | 0.127(1636)         | 0.149(1632)         | -0.187        | 0.0736        |
| ms.bip_buttr_eur        | 0        | 0.98        | 0.464           | 0.145(236)          | 0.129(236)          | 0.14          | 0.192         |
| ms.bip_uktr_eur         | 0        | 0.94        | 0.389           | 0.186(130)          | 0.158(130)          | 0.208         | 0.241         |
| <b>PGC_BIP32b_mds7a</b> | <b>0</b> | <b>0.97</b> | <b>3.27e-08</b> | <b>0.148(20352)</b> | <b>0.160(31358)</b> | <b>-0.104</b> | <b>0.0188</b> |

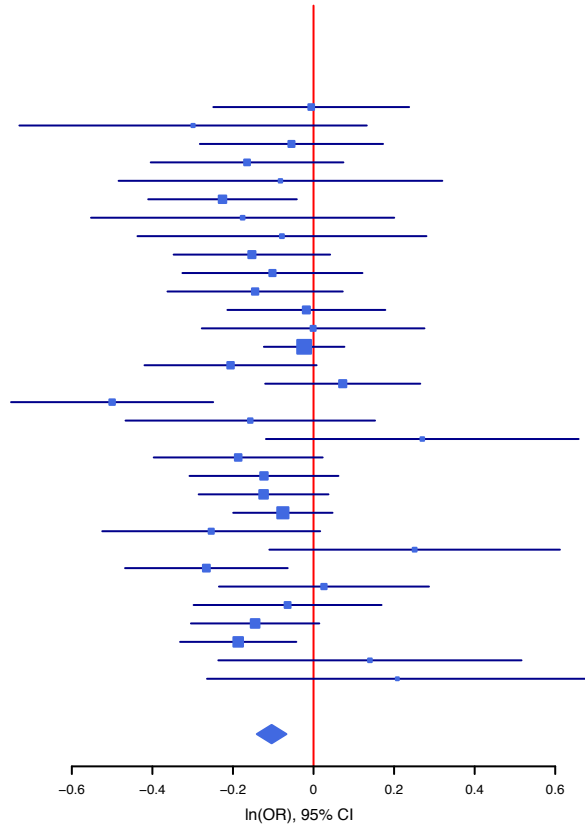



chr20\_43682549\_I I2/D 20:43682549  
 ++++++-----+++++-----+----+ het\_P: 0.315 het\_I: 3.6

|                         | ngt      | info        | p_value         | f_ca(n)             | f_co(n)             | ln(OR)         | STDerr        |
|-------------------------|----------|-------------|-----------------|---------------------|---------------------|----------------|---------------|
| bip_bmau_eur            | 0        | 0.94        | 0.669           | 0.264(329)          | 0.270(1810)         | -0.0425        | 0.0992        |
| bip_bmg2_eur            | 0        | 0.95        | 0.443           | 0.281(181)          | 0.296(479)          | -0.134         | 0.174         |
| bip_bmg3_eur            | 0        | 0.92        | 0.0126          | 0.260(490)          | 0.303(880)          | -0.236         | 0.0945        |
| bip_bmpo_eur            | 0        | 0.96        | 0.458           | 0.314(410)          | 0.321(689)          | -0.0746        | 0.101         |
| bip_bmsp_eur            | 0        | 0.97        | 0.873           | 0.294(253)          | 0.301(291)          | 0.0224         | 0.14          |
| bip_bonn_eur            | 0        | 0.91        | 0.434           | 0.266(674)          | 0.278(1245)         | -0.0636        | 0.0813        |
| bip_dub1_eur            | 0        | 0.94        | 0.194           | 0.226(150)          | 0.261(796)          | -0.202         | 0.156         |
| bip_edi1_eur            | 0        | 0.90        | 0.819           | 0.261(280)          | 0.251(275)          | 0.0339         | 0.148         |
| bip_fat2_eur            | 0        | 0.93        | 0.258           | 0.275(728)          | 0.289(1106)         | -0.0903        | 0.0797        |
| bip_fran_eur            | 0        | 0.91        | 0.99            | 0.290(451)          | 0.288(1630)         | -0.0011        | 0.0873        |
| bip_gain_eur            | 0        | 0.89        | 0.281           | 0.274(703)          | 0.290(603)          | -0.101         | 0.0933        |
| bip_gsk1_eur            | 0        | 0.92        | 0.934           | 0.253(741)          | 0.257(901)          | 0.00707        | 0.0852        |
| bip_hal2_eur            | 0        | 0.91        | 0.00542         | 0.234(410)          | 0.291(485)          | -0.322         | 0.116         |
| bip_icuk_eur            | 0        | 0.93        | 0.105           | 0.251(2524)         | 0.262(4106)         | -0.0692        | 0.0428        |
| bip_jst5_eur            | 0        | 0.94        | 0.369           | 0.285(644)          | 0.270(624)          | 0.0827         | 0.0921        |
| bip_may1_eur            | 0        | 0.95        | 0.146           | 0.276(934)          | 0.256(759)          | 0.12           | 0.0826        |
| bip_mich_eur            | 0        | 0.97        | 0.652           | 0.266(486)          | 0.278(436)          | -0.0485        | 0.107         |
| bip_pf1e_eur            | 0        | 0.88        | 0.212           | 0.249(378)          | 0.283(339)          | -0.165         | 0.133         |
| bip_rom3_eur            | 0        | 0.95        | 0.291           | 0.271(233)          | 0.311(198)          | -0.167         | 0.158         |
| bip_st2c_eur            | 0        | 0.94        | 0.736           | 0.293(634)          | 0.294(1216)         | -0.0273        | 0.0807        |
| bip_stp1_eur            | 0        | 0.94        | 0.717           | 0.272(920)          | 0.270(999)          | 0.0276         | 0.0763        |
| bip_swa2_eur            | 0        | 0.94        | 0.0134          | 0.273(884)          | 0.298(2257)         | -0.163         | 0.066         |
| bip_swei_eur            | 0        | 0.94        | 0.0243          | 0.269(1283)         | 0.288(3657)         | -0.121         | 0.0537        |
| bip_top7_eur            | 0        | 0.96        | 0.477           | 0.257(449)          | 0.274(373)          | -0.0826        | 0.116         |
| bip_top8_eur            | 0        | 0.95        | 0.643           | 0.293(149)          | 0.280(293)          | 0.0749         | 0.162         |
| bip_ucl2_eur            | 0        | 0.93        | 0.057           | 0.228(726)          | 0.257(693)          | -0.174         | 0.0916        |
| bip_uclo_eur            | 0        | 0.98        | 0.00249         | 0.219(441)          | 0.278(495)          | -0.334         | 0.111         |
| bip_ume4_eur            | 0        | 0.88        | 0.756           | 0.255(568)          | 0.261(569)          | -0.0319        | 0.103         |
| bip_usc2_eur            | 0        | 0.97        | 0.134           | 0.280(1297)         | 0.308(1156)         | -0.0987        | 0.0659        |
| bip_wtcc_eur            | 0        | 0.93        | 0.0582          | 0.254(1636)         | 0.274(1632)         | -0.111         | 0.0588        |
| ms.bip_butr_eur         | 0        | 0.97        | 0.354           | 0.307(236)          | 0.335(236)          | -0.131         | 0.142         |
| ms.bip_uktr_eur         | 0        | 0.82        | 0.612           | 0.272(130)          | 0.254(130)          | 0.111          | 0.22          |
| <b>PGC_BIP32b_mds7a</b> | <b>0</b> | <b>0.93</b> | <b>2.95e-07</b> | <b>0.265(20352)</b> | <b>0.281(31358)</b> | <b>-0.0796</b> | <b>0.0155</b> |

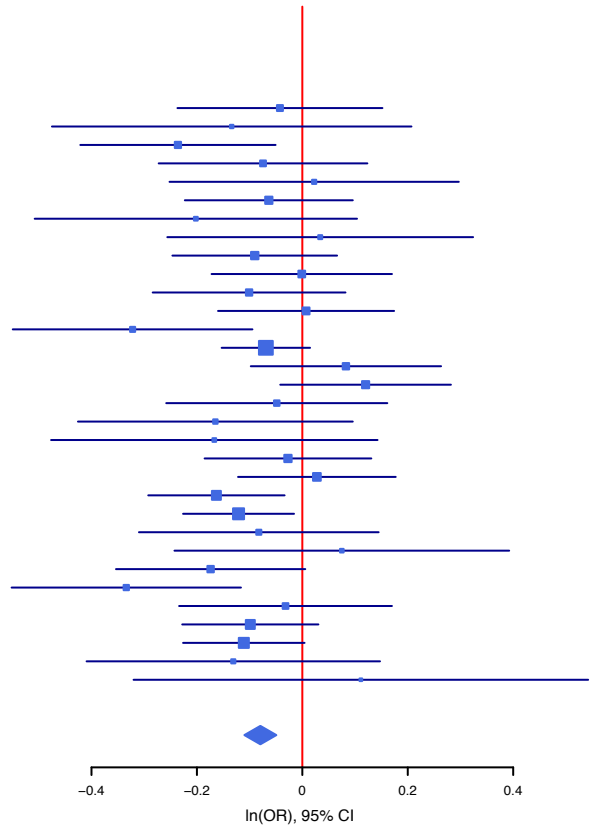

rs11647445 T/G

16:9926966  
het\_P: 0.939 het\_I: 0.0

|                 | ngt | info | p_value | f_ca(n)     | f_co(n)     | ln(OR)  | STDerr |
|-----------------|-----|------|---------|-------------|-------------|---------|--------|
| bip_bmau_eur    | 0   | 0.98 | 0.884   | 0.643(329)  | 0.637(1810) | 0.0131  | 0.0902 |
| bip_bmg2_eur    | 0   | 0.98 | 0.131   | 0.636(181)  | 0.653(479)  | -0.241  | 0.159  |
| bip_bmg3_eur    | 0   | 0.99 | 0.175   | 0.631(490)  | 0.654(880)  | -0.115  | 0.0846 |
| bip_bmpo_eur    | 0   | 0.96 | 0.177   | 0.641(410)  | 0.669(689)  | -0.132  | 0.0979 |
| bip_bmso_eur    | 0   | 1.04 | 0.422   | 0.556(253)  | 0.580(291)  | -0.101  | 0.125  |
| bip_bonn_eur    | 0   | 0.97 | 0.184   | 0.634(674)  | 0.657(1245) | -0.0977 | 0.0735 |
| bip_dub1_eur    | 0   | 0.92 | 0.789   | 0.621(150)  | 0.613(796)  | 0.0363  | 0.136  |
| bip_ed11_eur    | 0   | 0.94 | 0.643   | 0.658(280)  | 0.673(275)  | -0.0622 | 0.134  |
| bip_fat2_eur    | 0   | 0.98 | 0.676   | 0.651(728)  | 0.659(1106) | -0.0305 | 0.073  |
| bip_fran_eur    | 0   | 0.98 | 0.518   | 0.608(451)  | 0.619(1630) | -0.0509 | 0.0788 |
| bip_gain_eur    | 0   | 0.91 | 0.0816  | 0.633(703)  | 0.664(603)  | -0.152  | 0.087  |
| bip_gsk1_eur    | 0   | 0.95 | 0.789   | 0.643(741)  | 0.639(901)  | 0.0201  | 0.0753 |
| bip_hal2_eur    | 0   | 1.02 | 0.731   | 0.629(410)  | 0.641(485)  | -0.034  | 0.099  |
| bip_icuk_eur    | 0   | 1.02 | 0.0797  | 0.636(2524) | 0.652(4106) | -0.0651 | 0.0371 |
| bip_jst5_eur    | 0   | 0.97 | 0.0709  | 0.631(644)  | 0.666(624)  | -0.154  | 0.085  |
| bip_may1_eur    | 0   | 0.97 | 0.963   | 0.639(934)  | 0.643(759)  | 0.00349 | 0.0748 |
| bip_mich_eur    | 0   | 1.00 | 0.659   | 0.623(486)  | 0.638(436)  | -0.0433 | 0.0983 |
| bip_pf1e_eur    | 0   | 0.94 | 0.0831  | 0.602(378)  | 0.647(339)  | -0.202  | 0.117  |
| bip_rom3_eur    | 0   | 0.89 | 0.579   | 0.661(233)  | 0.673(198)  | -0.0868 | 0.156  |
| bip_st2c_eur    | 0   | 0.95 | 0.435   | 0.656(634)  | 0.669(1216) | -0.06   | 0.0769 |
| bip_stp1_eur    | 0   | 0.90 | 0.17    | 0.649(920)  | 0.668(999)  | -0.101  | 0.0734 |
| bip_swa2_eur    | 0   | 0.93 | 0.393   | 0.659(884)  | 0.669(2257) | -0.0537 | 0.0629 |
| bip_swei_eur    | 0   | 0.99 | 0.0126  | 0.633(1283) | 0.661(3657) | -0.121  | 0.0485 |
| bip_top7_eur    | 0   | 0.91 | 0.111   | 0.652(449)  | 0.691(373)  | -0.18   | 0.113  |
| bip_top8_eur    | 0   | 1.02 | 0.983   | 0.649(149)  | 0.655(293)  | -0.0031 | 0.15   |
| bip_ucl2_eur    | 0   | 0.97 | 0.564   | 0.637(726)  | 0.649(693)  | -0.0461 | 0.0799 |
| bip_ucl0_eur    | 0   | 0.96 | 0.536   | 0.655(441)  | 0.669(495)  | -0.0626 | 0.101  |
| bip_ume4_eur    | 0   | 1.04 | 0.00473 | 0.577(568)  | 0.637(569)  | -0.241  | 0.0851 |
| bip_usc2_eur    | 0   | 0.94 | 0.987   | 0.665(1297) | 0.668(1156) | 0.0011  | 0.0641 |
| bip_wtcc_eur    | 0   | 0.92 | 0.048   | 0.650(1636) | 0.676(1632) | -0.109  | 0.0552 |
| ms.bip_butr_eur | 0   | 1.01 | 0.985   | 0.648(236)  | 0.649(236)  | -0.0025 | 0.136  |
| ms.bip_uktr_eur | 0   | 0.96 | 0.336   | 0.684(130)  | 0.645(130)  | 0.183   | 0.19   |

**PGC\_BIP32b\_mds7a 0 0.97 1.22e-07 0.639(20352) 0.654(31358) -0.0749 0.0142**

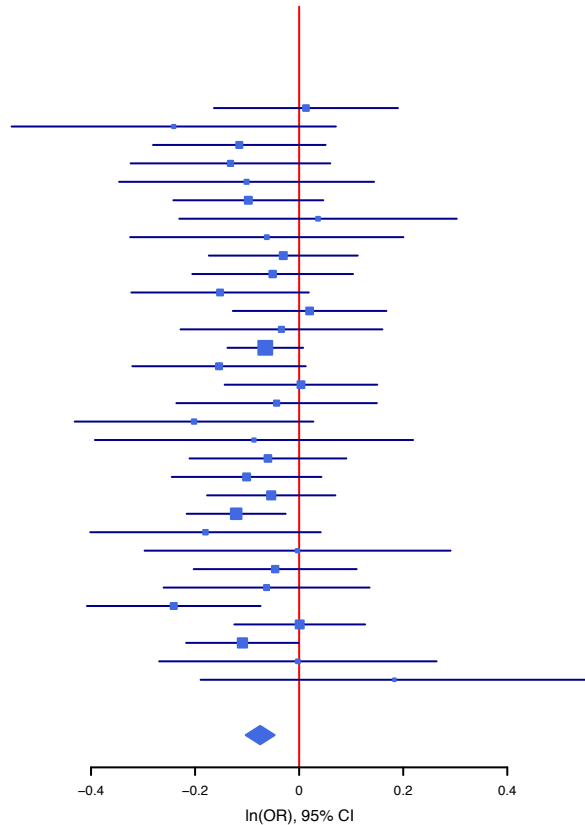



rs10896090 A/G 11:65945186  
 ++++++-----+-----+ het\_P: 0.393 het\_I: -1.5

|                 | ngt | info | p_value | f_ca(n)     | f_co(n)     | ln(OR)  | STDerr |
|-----------------|-----|------|---------|-------------|-------------|---------|--------|
| bip_bmau_eur    | 0   | 0.97 | 0.679   | 0.821(329)  | 0.816(1810) | 0.0465  | 0.113  |
| bip_bmg2_eur    | 0   | 1.11 | 0.604   | 0.807(181)  | 0.826(479)  | -0.0951 | 0.183  |
| bip_bmg3_eur    | 0   | 0.96 | 0.236   | 0.815(490)  | 0.801(880)  | 0.125   | 0.105  |
| bip_bmpo_eur    | 0   | 0.99 | 0.606   | 0.785(410)  | 0.785(689)  | 0.0579  | 0.112  |
| bip_bmsp_eur    | 0   | 1.00 | 0.153   | 0.796(253)  | 0.763(291)  | 0.22    | 0.154  |
| bip_bonn_eur    | 0   | 1.00 | 0.576   | 0.820(674)  | 0.810(1245) | 0.0502  | 0.0898 |
| bip_dub1_eur    | 0   | 1.02 | 0.746   | 0.838(150)  | 0.828(796)  | 0.0551  | 0.17   |
| bip_ed11_eur    | 0   | 0.96 | 0.621   | 0.826(280)  | 0.818(275)  | 0.0811  | 0.164  |
| bip_fat2_eur    | 0   | 0.96 | 0.434   | 0.818(728)  | 0.810(1106) | 0.0707  | 0.0906 |
| bip_fran_eur    | 0   | 1.00 | 0.503   | 0.789(451)  | 0.803(1630) | -0.0627 | 0.0936 |
| bip_gain_eur    | 0   | 0.98 | 0.366   | 0.820(703)  | 0.809(603)  | 0.0929  | 0.103  |
| bip_gsk1_eur    | 0   | 1.03 | 0.785   | 0.825(741)  | 0.819(901)  | 0.025   | 0.0914 |
| bip_hal2_eur    | 0   | 0.99 | 0.154   | 0.819(410)  | 0.791(485)  | 0.175   | 0.123  |
| bip_icuk_eur    | 0   | 0.97 | 0.223   | 0.826(2524) | 0.818(4106) | 0.0584  | 0.0479 |
| bip_jst5_eur    | 0   | 0.97 | 0.108   | 0.824(644)  | 0.798(624)  | 0.166   | 0.103  |
| bip_may1_eur    | 0   | 1.00 | 0.12    | 0.826(934)  | 0.806(759)  | 0.142   | 0.0912 |
| bip_mich_eur    | 0   | 0.92 | 0.621   | 0.809(486)  | 0.804(436)  | 0.0618  | 0.125  |
| bip_pf1e_eur    | 0   | 1.00 | 0.074   | 0.810(378)  | 0.845(339)  | -0.26   | 0.146  |
| bip_rom3_eur    | 0   | 1.05 | 0.162   | 0.807(233)  | 0.771(198)  | 0.233   | 0.166  |
| bip_st2c_eur    | 0   | 1.02 | 0.276   | 0.802(634)  | 0.787(1216) | 0.095   | 0.0873 |
| bip_stp1_eur    | 0   | 0.97 | 0.0108  | 0.814(920)  | 0.784(999)  | 0.213   | 0.0836 |
| bip_swa2_eur    | 0   | 0.98 | 0.00768 | 0.842(884)  | 0.814(2257) | 0.209   | 0.0784 |
| bip_swei_eur    | 0   | 1.03 | 0.277   | 0.826(1283) | 0.818(3657) | 0.0652  | 0.06   |
| bip_top7_eur    | 0   | 0.96 | 0.00634 | 0.850(449)  | 0.800(373)  | 0.371   | 0.136  |
| bip_top8_eur    | 0   | 1.03 | 0.811   | 0.805(149)  | 0.812(293)  | -0.0432 | 0.181  |
| bip_ucl2_eur    | 0   | 0.95 | 0.246   | 0.829(726)  | 0.812(693)  | 0.117   | 0.101  |
| bip_uclo_eur    | 0   | 0.97 | 0.0124  | 0.844(441)  | 0.797(495)  | 0.313   | 0.125  |
| bip_ume4_eur    | 0   | 0.98 | 0.134   | 0.836(568)  | 0.813(569)  | 0.168   | 0.112  |
| bip_usc2_eur    | 0   | 1.00 | 0.591   | 0.799(1297) | 0.802(1156) | -0.0396 | 0.0735 |
| bip_wtcc_eur    | 0   | 1.02 | 0.234   | 0.826(1636) | 0.816(1632) | 0.0767  | 0.0645 |
| ms.bip_butr_eur | 0   | 0.89 | 0.663   | 0.799(236)  | 0.788(236)  | 0.0744  | 0.171  |
| ms.bip_uktr_eur | 0   | 1.02 | 0.058   | 0.858(130)  | 0.793(130)  | 0.445   | 0.235  |

**PGC\_BIP32b\_mds7a 0 0.99 2.08e-07 0.820(20352) 0.809(31358) 0.0897 0.0173**

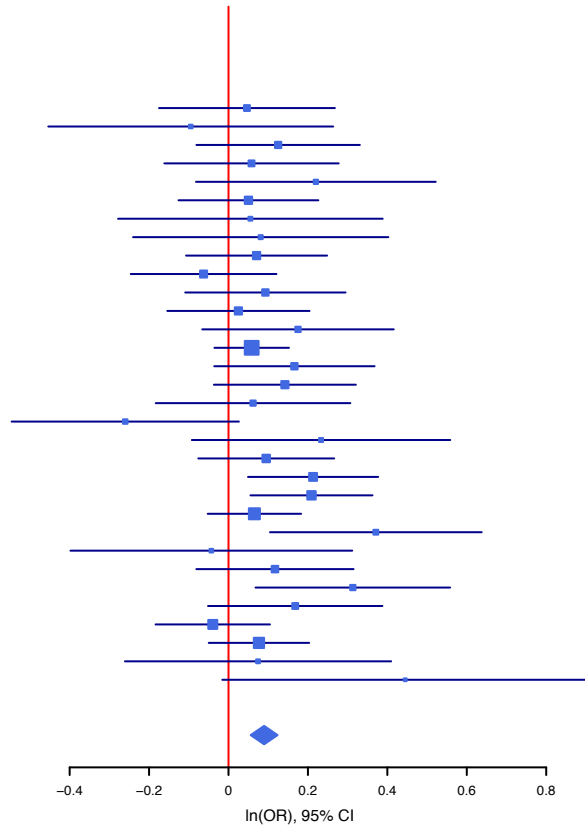







rs113779084 A/G  
 ++++++-----

7:11871787  
 het\_P: 0.0765 het\_I: 23.0

|                 | ngt | info | p_value | f_ca(n)     | f_co(n)     | ln(OR)  | STDerr |
|-----------------|-----|------|---------|-------------|-------------|---------|--------|
| bip_bmau_eur    | 0   | 0.97 | 0.659   | 0.318(329)  | 0.311(1810) | 0.0409  | 0.0928 |
| bip_bmg2_eur    | 0   | 1.00 | 0.282   | 0.332(181)  | 0.318(479)  | 0.174   | 0.162  |
| bip_bmg3_eur    | 0   | 0.94 | 0.484   | 0.304(490)  | 0.289(880)  | 0.0638  | 0.0913 |
| bip_bmpo_eur    | 0   | 0.93 | 0.247   | 0.376(410)  | 0.358(689)  | 0.114   | 0.0986 |
| bip_bmsp_eur    | 0   | 0.98 | 0.0678  | 0.330(253)  | 0.278(291)  | 0.254   | 0.139  |
| bip_bonn_eur    | 0   | 1.02 | 0.0576  | 0.338(674)  | 0.311(1245) | 0.139   | 0.0731 |
| bip_dub1_eur    | 0   | 0.97 | 0.277   | 0.357(150)  | 0.327(796)  | 0.147   | 0.135  |
| bip_ed1_eur     | 0   | 0.97 | 0.929   | 0.279(280)  | 0.285(275)  | 0.0124  | 0.139  |
| bip_fat2_eur    | 0   | 0.96 | 0.421   | 0.304(728)  | 0.318(1106) | -0.0613 | 0.0762 |
| bip_fran_eur    | 0   | 0.96 | 0.00158 | 0.337(451)  | 0.288(1630) | 0.262   | 0.0829 |
| bip_gain_eur    | 0   | 0.96 | 0.761   | 0.317(703)  | 0.324(603)  | -0.0262 | 0.0866 |
| bip_gsk1_eur    | 0   | 0.97 | 0.00165 | 0.321(741)  | 0.271(901)  | 0.248   | 0.0788 |
| bip_hal2_eur    | 0   | 0.95 | 0.228   | 0.336(410)  | 0.314(485)  | 0.127   | 0.105  |
| bip_icuk_eur    | 0   | 0.96 | 0.00255 | 0.320(2524) | 0.297(4106) | 0.12    | 0.0397 |
| bip_jst5_eur    | 0   | 1.04 | 0.977   | 0.290(644)  | 0.290(624)  | -0.0025 | 0.0861 |
| bip_may1_eur    | 0   | 0.99 | 0.515   | 0.304(934)  | 0.307(759)  | -0.0502 | 0.0771 |
| bip_mich_eur    | 0   | 0.95 | 0.996   | 0.293(486)  | 0.293(436)  | 0.0006  | 0.107  |
| bip_pf1e_eur    | 0   | 0.99 | 0.243   | 0.283(378)  | 0.323(339)  | -0.14   | 0.12   |
| bip_rom3_eur    | 0   | 0.95 | 0.477   | 0.345(233)  | 0.313(198)  | 0.109   | 0.153  |
| bip_st2c_eur    | 0   | 0.94 | 0.747   | 0.301(634)  | 0.302(1216) | 0.0258  | 0.0798 |
| bip_stp1_eur    | 0   | 0.97 | 0.196   | 0.303(920)  | 0.319(999)  | -0.0934 | 0.0723 |
| bip_swa2_eur    | 0   | 0.98 | 0.0607  | 0.334(884)  | 0.304(2257) | 0.117   | 0.0622 |
| bip_swei_eur    | 0   | 0.98 | 0.451   | 0.325(1283) | 0.316(3657) | 0.0378  | 0.0501 |
| bip_top7_eur    | 0   | 0.95 | 0.259   | 0.258(449)  | 0.280(373)  | -0.131  | 0.116  |
| bip_top8_eur    | 0   | 1.00 | 0.65    | 0.252(149)  | 0.258(293)  | -0.0753 | 0.166  |
| bip_ucl2_eur    | 0   | 0.98 | 0.278   | 0.322(726)  | 0.305(693)  | 0.0893  | 0.0824 |
| bip_ucl0_eur    | 0   | 0.96 | 0.241   | 0.308(441)  | 0.286(495)  | 0.123   | 0.105  |
| bip_ume4_eur    | 0   | 0.99 | 0.967   | 0.291(568)  | 0.291(569)  | 0.00379 | 0.0933 |
| bip_usc2_eur    | 0   | 0.97 | 0.527   | 0.285(1297) | 0.298(1156) | -0.0417 | 0.0659 |
| bip_wtcc_eur    | 0   | 0.97 | 0.0167  | 0.320(1636) | 0.293(1632) | 0.132   | 0.055  |
| ms.bip_butr_eur | 0   | 0.97 | 0.326   | 0.336(236)  | 0.306(236)  | 0.139   | 0.142  |
| ms.bip_ukr_eur  | 0   | 0.98 | 0.277   | 0.333(130)  | 0.289(130)  | 0.209   | 0.192  |

PGC\_BIP32b\_mds7a 0 0.97 7.32e-06 0.313(20352) 0.304(31358) 0.0656 0.0146

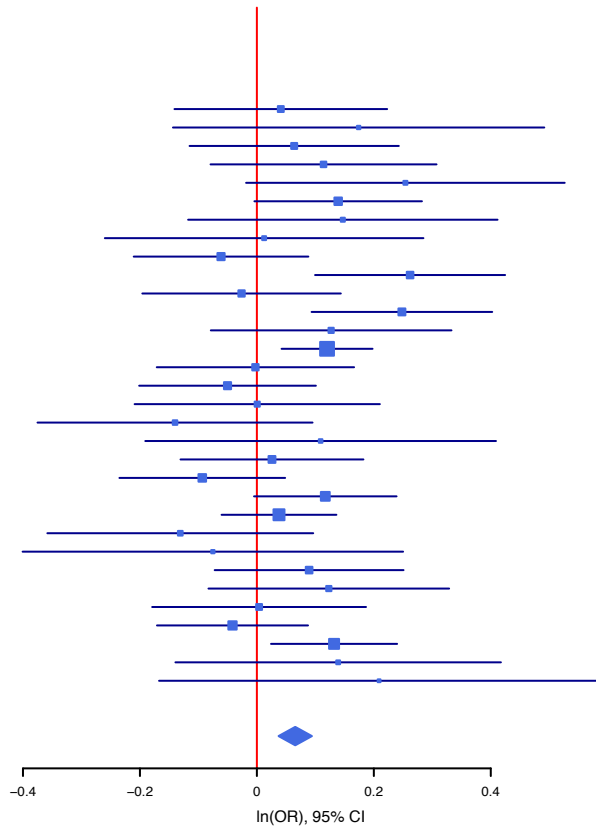

rs17183814                      A/G                      2:166152389  
 +-----+-----+-----+-----+                      het\_P:                      0.561                      het\_I:                      0.0

|                         | ngt       | info        | p_value         | f_ca(n)             | f_co(n)             | ln(OR)        | STDerr        |
|-------------------------|-----------|-------------|-----------------|---------------------|---------------------|---------------|---------------|
| bip_bmau_eur            | 0         | 0.93        | 0.706           | 0.076(329)          | 0.072(1810)         | 0.0628        | 0.167         |
| bip_bmg2_eur            | 1         | 1.00        | 0.453           | 0.061(181)          | 0.069(479)          | -0.224        | 0.298         |
| bip_bmg3_eur            | 0         | 0.95        | 0.765           | 0.077(490)          | 0.075(880)          | 0.0466        | 0.156         |
| bip_bmpo_eur            | 0         | 0.89        | 0.379           | 0.064(410)          | 0.053(689)          | 0.179         | 0.203         |
| bip_bmsp_eur            | 0         | 0.92        | 0.0406          | 0.036(253)          | 0.056(291)          | -0.672        | 0.328         |
| bip_bonn_eur            | 0         | 0.99        | 0.0358          | 0.066(674)          | 0.082(1245)         | -0.287        | 0.137         |
| bip_dub1_eur            | 0         | 0.96        | 0.919           | 0.072(150)          | 0.071(796)          | 0.0254        | 0.25          |
| bip_ed11_eur            | 0         | 0.94        | 0.683           | 0.082(280)          | 0.091(275)          | -0.0929       | 0.227         |
| bip_fat2_eur            | 0         | 0.94        | 0.231           | 0.066(728)          | 0.077(1106)         | -0.167        | 0.139         |
| bip_fran_eur            | 0         | 0.95        | 0.504           | 0.058(451)          | 0.065(1630)         | -0.111        | 0.166         |
| bip_gain_eur            | 0         | 0.95        | 0.152           | 0.064(703)          | 0.079(603)          | -0.227        | 0.158         |
| bip_gsk1_eur            | 0         | 0.96        | 0.792           | 0.074(741)          | 0.075(901)          | -0.0361       | 0.137         |
| bip_hal2_eur            | 0         | 0.95        | 0.0443          | 0.057(410)          | 0.078(485)          | -0.405        | 0.202         |
| bip_icuk_eur            | 0         | 0.93        | 0.00528         | 0.066(2524)         | 0.079(4106)         | -0.204        | 0.0731        |
| bip_jst5_eur            | 1         | 1.08        | 0.0672          | 0.064(644)          | 0.084(624)          | -0.271        | 0.148         |
| bip_may1_eur            | 1         | 1.01        | 0.609           | 0.077(934)          | 0.079(759)          | -0.0672       | 0.132         |
| bip_mich_eur            | 0         | 0.94        | 0.829           | 0.071(486)          | 0.073(436)          | -0.0406       | 0.188         |
| bip_pf1e_eur            | 1         | 1.03        | 0.0859          | 0.075(378)          | 0.050(339)          | 0.39          | 0.227         |
| bip_rom3_eur            | 0         | 0.88        | 0.206           | 0.055(233)          | 0.076(198)          | -0.38         | 0.3           |
| bip_st2c_eur            | 0         | 0.83        | 0.0455          | 0.071(634)          | 0.083(1216)         | -0.296        | 0.148         |
| bip_stp1_eur            | 0         | 0.83        | 0.279           | 0.074(920)          | 0.084(999)          | -0.145        | 0.134         |
| bip_swa2_eur            | 0         | 0.98        | 0.416           | 0.063(884)          | 0.070(2257)         | -0.0961       | 0.118         |
| bip_swei_eur            | 1         | 0.98        | 0.0287          | 0.058(1283)         | 0.072(3657)         | -0.213        | 0.0973        |
| bip_top7_eur            | 0         | 0.95        | 0.262           | 0.061(449)          | 0.073(373)          | -0.231        | 0.206         |
| bip_top8_eur            | 1         | 0.99        | 0.732           | 0.074(149)          | 0.068(293)          | 0.0955        | 0.279         |
| bip_ucl2_eur            | 0         | 0.90        | 0.106           | 0.072(726)          | 0.089(693)          | -0.238        | 0.147         |
| bip_ucl0_eur            | 0         | 0.87        | 0.494           | 0.078(441)          | 0.070(495)          | 0.13          | 0.191         |
| bip_ume4_eur            | 1         | 0.95        | 0.99            | 0.062(568)          | 0.062(569)          | 0.0022        | 0.178         |
| bip_usc2_eur            | 1         | 0.98        | 0.143           | 0.070(1297)         | 0.079(1156)         | -0.163        | 0.112         |
| bip_wtcc_eur            | 0         | 0.87        | 0.162           | 0.074(1636)         | 0.083(1632)         | -0.139        | 0.0997        |
| ms.bip_butr_eur         | 1         | 1.00        | 0.113           | 0.051(236)          | 0.076(236)          | -0.432        | 0.273         |
| ms.bip_uktr_eur         | 1         | 1.03        | 0.414           | 0.085(130)          | 0.065(130)          | 0.271         | 0.332         |
| <b>PGC_BIP32b_mds7a</b> | <b>10</b> | <b>0.94</b> | <b>1.49e-07</b> | <b>0.068(20352)</b> | <b>0.075(31358)</b> | <b>-0.141</b> | <b>0.0268</b> |

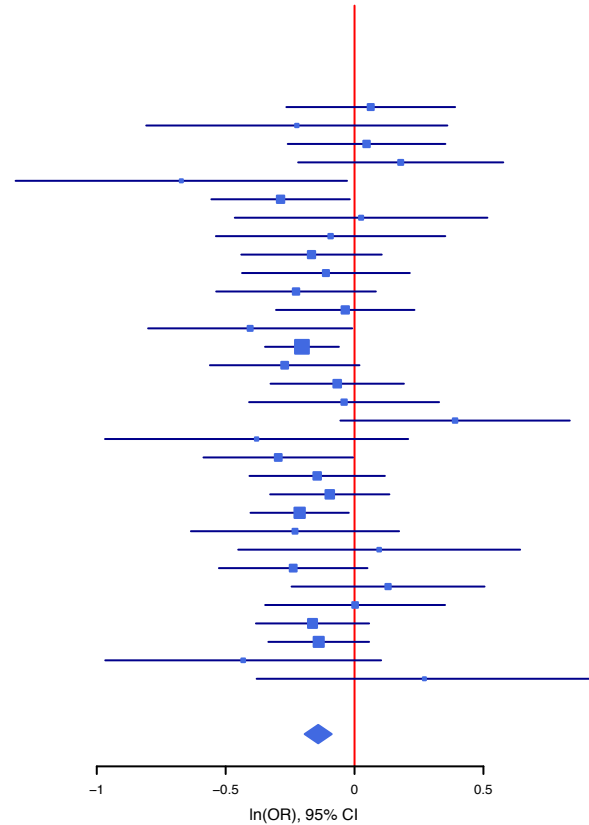



rs112114764 T/G 17:42201041  
 het\_P: 0.155 het\_I: 15.2

|                         | ngt      | info        | p_value         | f_ca(n)             | f_co(n)             | ln(OR)       | STDerr        |
|-------------------------|----------|-------------|-----------------|---------------------|---------------------|--------------|---------------|
| bip_bmau_eur            | 0        | 0.98        | 0.524           | 0.697(329)          | 0.686(1810)         | 0.0595       | 0.0933        |
| bip_bmg2_eur            | 0        | 0.93        | 0.713           | 0.640(181)          | 0.679(479)          | -0.0619      | 0.168         |
| bip_bmg3_eur            | 0        | 0.97        | 0.0116          | 0.657(490)          | 0.705(880)          | -0.223       | 0.0883        |
| bip_bmpo_eur            | 0        | 0.90        | 0.754           | 0.628(410)          | 0.629(689)          | -0.0311      | 0.0992        |
| bip_bmsp_eur            | 0        | 0.99        | 0.94            | 0.645(253)          | 0.632(291)          | -0.00995     | 0.133         |
| bip_bonn_eur            | 0        | 0.99        | 0.41            | 0.673(674)          | 0.686(1245)         | -0.0613      | 0.0746        |
| bip_dub1_eur            | 0        | 0.99        | 0.789           | 0.687(150)          | 0.678(796)          | 0.0367       | 0.137         |
| bip_edi1_eur            | 0        | 0.88        | 0.242           | 0.653(280)          | 0.690(275)          | -0.164       | 0.14          |
| bip_fat2_eur            | 0        | 0.98        | 0.308           | 0.666(728)          | 0.691(1106)         | -0.0763      | 0.0749        |
| bip_fran_eur            | 0        | 0.97        | 0.566           | 0.664(451)          | 0.677(1630)         | -0.0471      | 0.082         |
| bip_gain_eur            | 0        | 0.92        | 0.266           | 0.662(703)          | 0.685(603)          | -0.0982      | 0.0882        |
| bip_gsk1_eur            | 0        | 0.99        | 3.45e-05        | 0.644(741)          | 0.709(901)          | -0.317       | 0.0766        |
| bip_hal2_eur            | 0        | 0.94        | 0.979           | 0.673(410)          | 0.664(485)          | 0.0027       | 0.105         |
| bip_icuk_eur            | 0        | 0.96        | 0.00869         | 0.681(2524)         | 0.705(4106)         | -0.104       | 0.0397        |
| bip_jst5_eur            | 0        | 0.98        | 0.0731          | 0.663(644)          | 0.696(624)          | -0.158       | 0.0881        |
| bip_may1_eur            | 0        | 0.95        | 0.527           | 0.684(934)          | 0.697(759)          | -0.0498      | 0.0787        |
| bip_mich_eur            | 0        | 0.95        | 0.704           | 0.659(486)          | 0.664(436)          | -0.0394      | 0.104         |
| bip_pf1e_eur            | 0        | 0.96        | 0.445           | 0.666(378)          | 0.683(339)          | -0.0916      | 0.12          |
| bip_rom3_eur            | 0        | 0.97        | 0.99            | 0.643(233)          | 0.649(198)          | 0.0018       | 0.148         |
| bip_st2c_eur            | 0        | 0.90        | 0.0773          | 0.636(634)          | 0.673(1216)         | -0.141       | 0.0798        |
| bip_stp1_eur            | 0        | 0.94        | 0.197           | 0.664(920)          | 0.687(999)          | -0.0937      | 0.0726        |
| bip_swa2_eur            | 0        | 0.97        | 0.622           | 0.696(884)          | 0.707(2257)         | -0.0315      | 0.0639        |
| bip_swei_eur            | 0        | 0.96        | 0.279           | 0.682(1283)         | 0.698(3657)         | -0.0551      | 0.0509        |
| bip_top7_eur            | 0        | 0.96        | 0.00106         | 0.710(449)          | 0.637(373)          | 0.363        | 0.111         |
| bip_top8_eur            | 0        | 1.07        | 0.416           | 0.623(149)          | 0.653(293)          | -0.118       | 0.146         |
| bip_ucl2_eur            | 0        | 1.01        | 0.419           | 0.705(726)          | 0.719(693)          | -0.067       | 0.083         |
| bip_ucl0_eur            | 0        | 0.91        | 0.635           | 0.691(441)          | 0.697(495)          | -0.0503      | 0.106         |
| bip_ume4_eur            | 0        | 0.98        | 0.194           | 0.677(568)          | 0.703(569)          | -0.12        | 0.0925        |
| bip_usc2_eur            | 0        | 0.99        | 0.994           | 0.659(1297)         | 0.659(1156)         | -0.0005      | 0.063         |
| bip_wtcc_eur            | 0        | 0.92        | 0.311           | 0.676(1636)         | 0.690(1632)         | -0.0568      | 0.056         |
| ms.bip_buttr_eur        | 0        | 1.01        | 0.634           | 0.670(236)          | 0.655(236)          | 0.0651       | 0.137         |
| ms.bip_uktr_eur         | 0        | 1.00        | 0.578           | 0.666(130)          | 0.689(130)          | -0.104       | 0.188         |
| <b>PGC_BIP32b_mds7a</b> | <b>0</b> | <b>0.96</b> | <b>1.68e-06</b> | <b>0.671(20352)</b> | <b>0.689(31358)</b> | <b>-0.07</b> | <b>0.0146</b> |

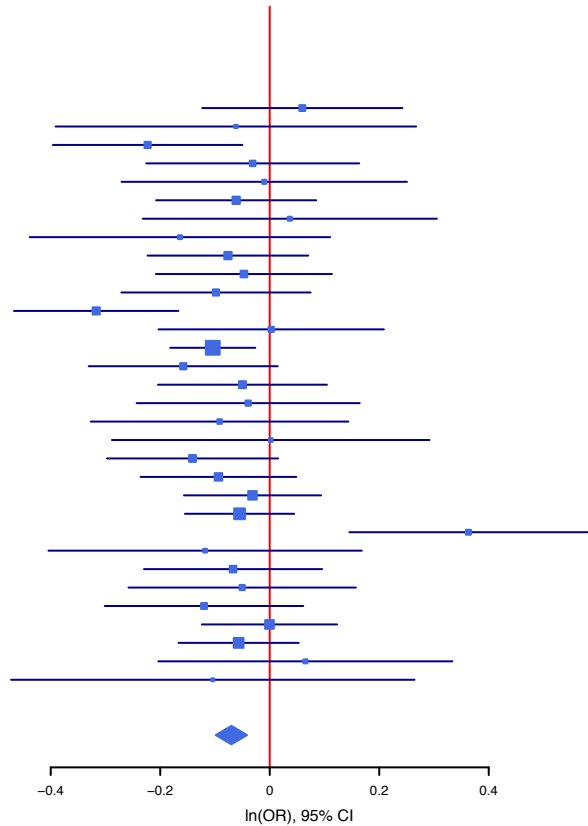



rs7122539                      A/G                      11:66662731  
 +-----+-----+-----+                      het\_P:                      0.332                      het\_I:                      2.5

|                         | ngt       | info        | p_value         | f_ca(n)             | f_co(n)             | ln(OR)         | STDerr        |
|-------------------------|-----------|-------------|-----------------|---------------------|---------------------|----------------|---------------|
| bip_bmau_eur            | 1         | 1.03        | 0.0353          | 0.287(329)          | 0.330(1810)         | -0.194         | 0.092         |
| bip_bmg2_eur            | 1         | 0.97        | 0.627           | 0.384(181)          | 0.378(479)          | 0.0756         | 0.156         |
| bip_bmg3_eur            | 1         | 0.98        | 0.461           | 0.331(490)          | 0.345(880)          | -0.0636        | 0.0862        |
| bip_bmpo_eur            | 0         | 1.03        | 0.544           | 0.352(410)          | 0.374(689)          | -0.0576        | 0.0949        |
| bip_bmsp_eur            | 1         | 0.94        | 0.388           | 0.338(253)          | 0.359(291)          | -0.118         | 0.137         |
| bip_bonn_eur            | 1         | 1.03        | 0.00383         | 0.302(674)          | 0.353(1245)         | -0.213         | 0.0735        |
| bip_dub1_eur            | 0         | 0.96        | 0.645           | 0.294(150)          | 0.306(796)          | -0.0653        | 0.142         |
| bip_edi1_eur            | 0         | 0.94        | 0.244           | 0.342(280)          | 0.306(275)          | 0.157          | 0.135         |
| bip_fat2_eur            | 0         | 0.98        | 0.108           | 0.323(728)          | 0.346(1106)         | -0.119         | 0.0743        |
| bip_fran_eur            | 0         | 0.95        | 0.186           | 0.329(451)          | 0.350(1630)         | -0.11          | 0.0832        |
| bip_gain_eur            | 0         | 0.96        | 0.362           | 0.331(703)          | 0.346(603)          | -0.0775        | 0.0851        |
| bip_gsk1_eur            | 1         | 1.03        | 0.0961          | 0.310(741)          | 0.339(901)          | -0.124         | 0.0744        |
| bip_hal2_eur            | 1         | 1.01        | 0.015           | 0.301(410)          | 0.356(485)          | -0.25          | 0.103         |
| bip_icuk_eur            | 1         | 1.00        | 0.884           | 0.335(2524)         | 0.337(4106)         | -0.00552       | 0.0381        |
| bip_jst5_eur            | 1         | 1.00        | 0.71            | 0.328(644)          | 0.337(624)          | -0.0316        | 0.0848        |
| bip_may1_eur            | 1         | 1.04        | 0.0436          | 0.319(934)          | 0.359(759)          | -0.148         | 0.0735        |
| bip_mich_eur            | 1         | 0.99        | 0.0295          | 0.325(486)          | 0.374(436)          | -0.217         | 0.0997        |
| bip_pf1e_eur            | 1         | 0.97        | 0.723           | 0.319(378)          | 0.330(339)          | -0.042         | 0.118         |
| bip_rom3_eur            | 1         | 0.99        | 0.968           | 0.345(233)          | 0.343(198)          | 0.00598        | 0.147         |
| bip_st2c_eur            | 0         | 0.96        | 0.707           | 0.342(634)          | 0.345(1216)         | -0.0288        | 0.0764        |
| bip_stp1_eur            | 0         | 0.93        | 0.189           | 0.334(920)          | 0.351(999)          | -0.0943        | 0.0718        |
| bip_swa2_eur            | 0         | 0.97        | 0.0515          | 0.353(884)          | 0.379(2257)         | -0.118         | 0.0608        |
| bip_swei_eur            | 1         | 1.00        | 0.187           | 0.344(1283)         | 0.360(3657)         | -0.064         | 0.0486        |
| bip_top7_eur            | 0         | 0.95        | 0.769           | 0.338(449)          | 0.343(373)          | -0.032         | 0.109         |
| bip_top8_eur            | 1         | 1.03        | 0.54            | 0.366(149)          | 0.346(293)          | 0.0902         | 0.147         |
| bip_ucl2_eur            | 1         | 1.00        | 0.879           | 0.320(726)          | 0.319(693)          | 0.0123         | 0.0809        |
| bip_ucl0_eur            | 0         | 1.00        | 0.927           | 0.331(441)          | 0.330(495)          | 0.00916        | 0.0992        |
| bip_ume4_eur            | 1         | 0.98        | 0.00578         | 0.325(568)          | 0.381(569)          | -0.247         | 0.0896        |
| bip_usc2_eur            | 1         | 0.99        | 0.34            | 0.347(1297)         | 0.342(1156)         | 0.0592         | 0.062         |
| bip_wtcc_eur            | 0         | 0.94        | 0.0702          | 0.323(1636)         | 0.345(1632)         | -0.0988        | 0.0546        |
| ms.bip_buttr_eur        | 1         | 1.02        | 0.188           | 0.377(236)          | 0.419(236)          | -0.174         | 0.132         |
| ms.bip_uktr_eur         | 1         | 1.02        | 0.849           | 0.300(130)          | 0.292(130)          | 0.0361         | 0.19          |
| <b>PGC_BIP32b_mds7a</b> | <b>20</b> | <b>0.99</b> | <b>2.23e-07</b> | <b>0.331(20352)</b> | <b>0.348(31358)</b> | <b>-0.0735</b> | <b>0.0142</b> |

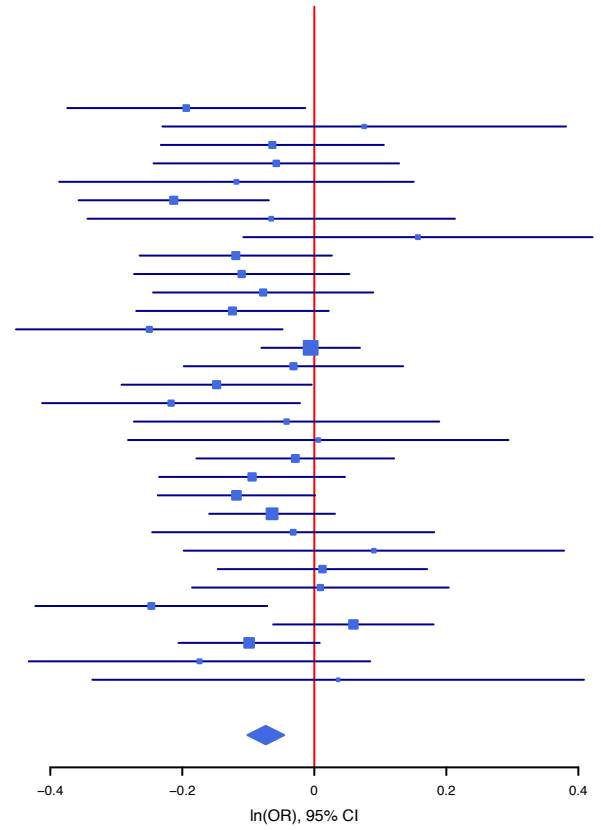

chr7\_14070006\_I D/3 7:14070006  
het\_P: 0.671 het\_I: 0.0

|                 | ngt | info | p_value | f_ca(n)     | f_co(n)     | ln(OR)  | STDerr |
|-----------------|-----|------|---------|-------------|-------------|---------|--------|
| bip_bmau_eur    | 0   | 0.86 | 0.271   | 0.225(329)  | 0.242(1810) | -0.121  | 0.11   |
| bip_bmg2_eur    | 0   | 0.91 | 0.153   | 0.206(181)  | 0.241(479)  | -0.277  | 0.194  |
| bip_bmg3_eur    | 0   | 0.84 | 0.835   | 0.248(490)  | 0.254(880)  | -0.0212 | 0.102  |
| bip_bmpo_eur    | 0   | 0.91 | 0.498   | 0.239(410)  | 0.244(689)  | -0.0767 | 0.113  |
| bip_bmsp_eur    | 0   | 0.92 | 0.975   | 0.244(253)  | 0.244(291)  | 0.00489 | 0.153  |
| bip_bonn_eur    | 0   | 0.86 | 0.159   | 0.234(674)  | 0.251(1245) | -0.123  | 0.0877 |
| bip_dub1_eur    | 0   | 0.90 | 0.81    | 0.267(150)  | 0.262(796)  | 0.0363  | 0.151  |
| bip_edi1_eur    | 0   | 0.88 | 0.931   | 0.248(280)  | 0.251(275)  | -0.0131 | 0.151  |
| bip_fat2_eur    | 0   | 0.84 | 0.801   | 0.261(728)  | 0.267(1106) | -0.0215 | 0.0852 |
| bip_fran_eur    | 0   | 0.84 | 0.127   | 0.227(451)  | 0.249(1630) | -0.151  | 0.0988 |
| bip_gain_eur    | 0   | 0.87 | 0.396   | 0.249(703)  | 0.261(603)  | -0.0826 | 0.0974 |
| bip_gsk1_eur    | 0   | 0.90 | 0.201   | 0.220(741)  | 0.238(901)  | -0.113  | 0.0887 |
| bip_hal2_eur    | 0   | 0.82 | 0.0177  | 0.207(410)  | 0.250(485)  | -0.304  | 0.128  |
| bip_icuk_eur    | 0   | 0.88 | 0.0037  | 0.224(2524) | 0.244(4106) | -0.132  | 0.0455 |
| bip_jst5_eur    | 0   | 0.89 | 0.214   | 0.242(644)  | 0.262(624)  | -0.121  | 0.0976 |
| bip_may1_eur    | 0   | 0.91 | 0.702   | 0.251(934)  | 0.244(759)  | 0.033   | 0.0859 |
| bip_mich_eur    | 0   | 0.84 | 0.151   | 0.225(486)  | 0.255(436)  | -0.173  | 0.121  |
| bip_pf1e_eur    | 0   | 0.89 | 0.105   | 0.216(378)  | 0.252(339)  | -0.222  | 0.137  |
| bip_rom3_eur    | 0   | 0.89 | 0.698   | 0.231(233)  | 0.219(198)  | 0.0704  | 0.181  |
| bip_st2c_eur    | 0   | 0.90 | 0.323   | 0.241(634)  | 0.252(1216) | -0.0858 | 0.0868 |
| bip_stp1_eur    | 0   | 0.87 | 0.0362  | 0.247(920)  | 0.275(999)  | -0.168  | 0.0802 |
| bip_swa2_eur    | 0   | 0.90 | 0.34    | 0.265(884)  | 0.254(2257) | 0.0656  | 0.0688 |
| bip_swei_eur    | 0   | 0.89 | 0.066   | 0.234(1283) | 0.252(3657) | -0.106  | 0.0577 |
| bip_top7_eur    | 0   | 0.91 | 0.207   | 0.275(449)  | 0.249(373)  | 0.152   | 0.121  |
| bip_top8_eur    | 0   | 0.89 | 0.0754  | 0.217(149)  | 0.270(293)  | -0.326  | 0.183  |
| bip_ucl2_eur    | 0   | 0.91 | 0.788   | 0.253(726)  | 0.250(693)  | 0.0247  | 0.0917 |
| bip_uclo_eur    | 0   | 0.86 | 0.376   | 0.238(441)  | 0.256(495)  | -0.103  | 0.117  |
| bip_ume4_eur    | 0   | 0.87 | 0.711   | 0.217(568)  | 0.224(569)  | -0.0404 | 0.109  |
| bip_usc2_eur    | 0   | 0.89 | 0.194   | 0.244(1297) | 0.261(1156) | -0.0924 | 0.0712 |
| bip_wtcc_eur    | 0   | 0.86 | 0.0207  | 0.245(1636) | 0.268(1632) | -0.143  | 0.0618 |
| ms.bip_butr_eur | 0   | 0.86 | 0.488   | 0.250(236)  | 0.268(236)  | -0.111  | 0.161  |
| ms.bip_uktr_eur | 0   | 0.86 | 0.225   | 0.233(130)  | 0.276(130)  | -0.265  | 0.218  |

**PGC\_BIP32b\_mds7a 0 0.88 9.44e-08 0.239(20352) 0.252(31358) -0.0884 0.0166**

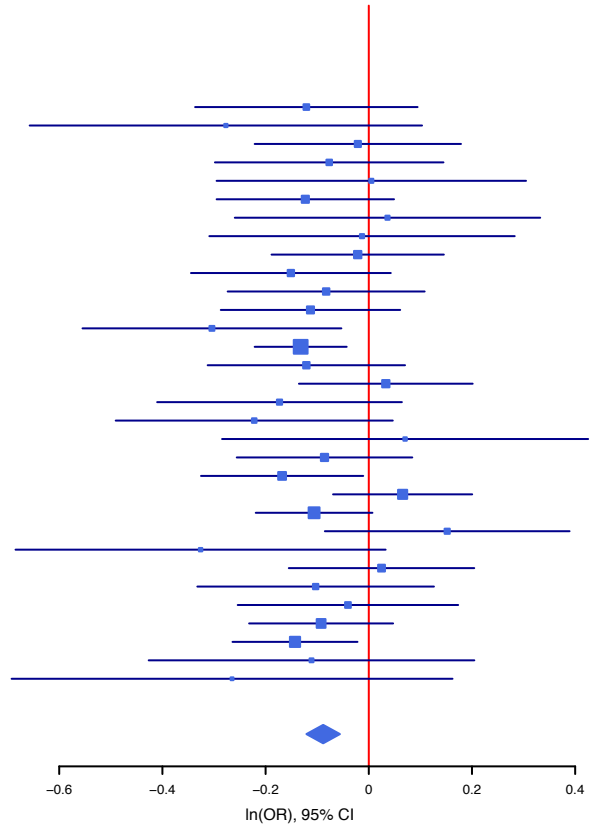

rs12226877 A/G 11:61591907  
 ++++++-----+++++-----+++++ het\_P: 0.309 het\_I: 4.0

|                         | ngt      | info        | p_value         | f_ca(n)             | f_co(n)             | ln(OR)        | STDerr        |
|-------------------------|----------|-------------|-----------------|---------------------|---------------------|---------------|---------------|
| bip_bmau_eur            | 0        | 0.85        | 0.0412          | 0.333(329)          | 0.297(1810)         | 0.202         | 0.0987        |
| bip_bmg2_eur            | 0        | 0.88        | 0.891           | 0.285(181)          | 0.272(479)          | 0.0245        | 0.179         |
| bip_bmg3_eur            | 0        | 0.81        | 0.306           | 0.297(490)          | 0.276(880)          | 0.102         | 0.0993        |
| bip_bmpo_eur            | 0        | 0.84        | 0.276           | 0.288(410)          | 0.262(689)          | 0.121         | 0.111         |
| bip_bmsp_eur            | 0        | 0.74        | 0.961           | 0.281(253)          | 0.286(291)          | -0.00793      | 0.164         |
| bip_bonn_eur            | 0        | 0.84        | 0.515           | 0.284(674)          | 0.280(1245)         | 0.0547        | 0.0839        |
| bip_dub1_eur            | 0        | 0.84        | 0.813           | 0.301(150)          | 0.307(796)          | -0.0357       | 0.151         |
| bip_edi1_eur            | 0        | 0.80        | 0.285           | 0.268(280)          | 0.293(275)          | -0.165        | 0.154         |
| bip_fat2_eur            | 0        | 0.82        | 0.27            | 0.298(728)          | 0.282(1106)         | 0.0925        | 0.0839        |
| bip_fran_eur            | 0        | 0.83        | 0.712           | 0.270(451)          | 0.278(1630)         | -0.0347       | 0.0938        |
| bip_gain_eur            | 0        | 0.87        | 0.356           | 0.305(703)          | 0.291(603)          | 0.0855        | 0.0928        |
| bip_gsk1_eur            | 0        | 0.83        | 0.191           | 0.306(741)          | 0.285(901)          | 0.111         | 0.0845        |
| bip_hal2_eur            | 0        | 0.86        | 0.05            | 0.321(410)          | 0.276(485)          | 0.224         | 0.114         |
| bip_icuk_eur            | 0        | 0.85        | 0.00796         | 0.321(2524)         | 0.307(4106)         | 0.112         | 0.042         |
| bip_jst5_eur            | 0        | 0.87        | 0.658           | 0.296(644)          | 0.288(624)          | 0.0416        | 0.0941        |
| bip_may1_eur            | 0        | 0.84        | 0.697           | 0.294(934)          | 0.290(759)          | 0.033         | 0.0848        |
| bip_mich_eur            | 0        | 0.85        | 6.27e-06        | 0.351(486)          | 0.266(436)          | 0.517         | 0.114         |
| bip_pf1e_eur            | 0        | 0.83        | 0.663           | 0.298(378)          | 0.297(339)          | -0.0571       | 0.131         |
| bip_rom3_eur            | 0        | 0.89        | 0.706           | 0.278(233)          | 0.268(198)          | 0.0622        | 0.165         |
| bip_st2c_eur            | 0        | 0.75        | 0.559           | 0.301(634)          | 0.300(1216)         | 0.0519        | 0.0889        |
| bip_stp1_eur            | 0        | 0.74        | 0.563           | 0.291(920)          | 0.299(999)          | -0.0484       | 0.0835        |
| bip_swa2_eur            | 0        | 0.82        | 0.0968          | 0.325(884)          | 0.306(2257)         | 0.113         | 0.068         |
| bip_swei_eur            | 0        | 0.87        | 0.00503         | 0.329(1283)         | 0.303(3657)         | 0.149         | 0.0533        |
| bip_top7_eur            | 0        | 0.89        | 0.0342          | 0.348(449)          | 0.303(373)          | 0.243         | 0.115         |
| bip_top8_eur            | 0        | 0.89        | 0.466           | 0.344(149)          | 0.326(293)          | 0.118         | 0.162         |
| bip_ucl2_eur            | 0        | 0.87        | 0.798           | 0.312(726)          | 0.310(693)          | 0.0223        | 0.0871        |
| bip_ucl0_eur            | 0        | 0.79        | 0.466           | 0.309(441)          | 0.294(495)          | 0.0831        | 0.114         |
| bip_ume4_eur            | 0        | 0.86        | 0.61            | 0.318(568)          | 0.309(569)          | 0.0499        | 0.0979        |
| bip_usc2_eur            | 0        | 0.85        | 0.238           | 0.301(1297)         | 0.282(1156)         | 0.0823        | 0.0698        |
| bip_wtcc_eur            | 0        | 0.81        | 0.0938          | 0.302(1636)         | 0.286(1632)         | 0.102         | 0.0608        |
| ms.bip_buttr_eur        | 0        | 0.82        | 0.577           | 0.258(236)          | 0.244(236)          | 0.0927        | 0.166         |
| ms.bip_uktr_eur         | 0        | 1.00        | 0.257           | 0.302(130)          | 0.348(130)          | -0.214        | 0.188         |
| <b>PGC_BIP32b_mds7a</b> | <b>0</b> | <b>0.84</b> | <b>1.17e-08</b> | <b>0.307(20352)</b> | <b>0.293(31358)</b> | <b>0.0906</b> | <b>0.0159</b> |

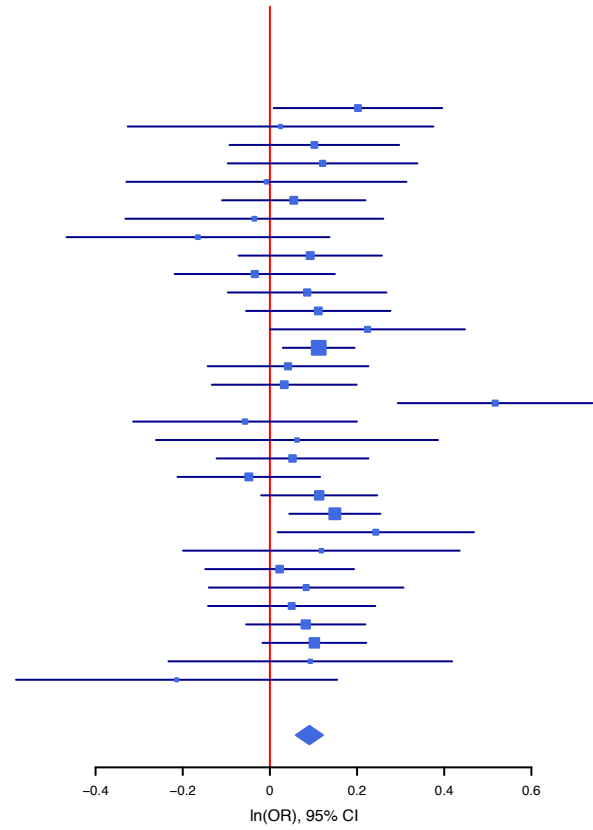

rs10744560 T/C 12:2387099  
 ++++++-----+++++-----  
 het\_P: 0.0762 het\_I: 23.0

|                 | ngt | info | p_value  | f_ca(n)     | f_co(n)     | ln(OR)  | STDerr |
|-----------------|-----|------|----------|-------------|-------------|---------|--------|
| bip_bmau_eur    | 0   | 1.02 | 0.0992   | 0.383(329)  | 0.350(1810) | 0.143   | 0.0868 |
| bip_bmg2_eur    | 0   | 1.05 | 0.71     | 0.335(181)  | 0.315(479)  | 0.0575  | 0.155  |
| bip_bmg3_eur    | 0   | 1.02 | 0.413    | 0.318(490)  | 0.331(880)  | -0.0701 | 0.0857 |
| bip_bmpo_eur    | 0   | 1.00 | 0.104    | 0.341(410)  | 0.370(689)  | -0.156  | 0.0961 |
| bip_bmsp_eur    | 0   | 0.96 | 0.18     | 0.302(253)  | 0.275(291)  | 0.194   | 0.144  |
| bip_bonn_eur    | 0   | 1.00 | 0.209    | 0.343(674)  | 0.326(1245) | 0.0917  | 0.073  |
| bip_dub1_eur    | 1   | 1.01 | 0.417    | 0.387(150)  | 0.362(796)  | 0.105   | 0.129  |
| bip_ed1_eur     | 1   | 1.08 | 0.508    | 0.346(280)  | 0.322(275)  | 0.0828  | 0.125  |
| bip_fat2_eur    | 1   | 1.01 | 0.632    | 0.337(728)  | 0.331(1106) | 0.0347  | 0.0725 |
| bip_fran_eur    | 0   | 0.98 | 0.00568  | 0.346(451)  | 0.304(1630) | 0.226   | 0.0816 |
| bip_gain_eur    | 1   | 1.02 | 0.735    | 0.336(703)  | 0.329(603)  | 0.0281  | 0.0831 |
| bip_gsk1_eur    | 0   | 1.00 | 0.279    | 0.367(741)  | 0.347(901)  | 0.0798  | 0.0737 |
| bip_hal2_eur    | 0   | 1.01 | 0.742    | 0.357(410)  | 0.344(485)  | 0.0331  | 0.101  |
| bip_icuk_eur    | 0   | 1.00 | 0.000398 | 0.363(2524) | 0.333(4106) | 0.134   | 0.0377 |
| bip_jst5_eur    | 0   | 1.01 | 0.095    | 0.369(644)  | 0.336(624)  | 0.139   | 0.0833 |
| bip_may1_eur    | 0   | 1.03 | 0.628    | 0.348(934)  | 0.346(759)  | 0.0355  | 0.0733 |
| bip_mich_eur    | 0   | 1.03 | 0.898    | 0.331(486)  | 0.328(436)  | 0.0127  | 0.0994 |
| bip_pf1e_eur    | 0   | 1.01 | 0.389    | 0.349(378)  | 0.319(339)  | 0.0995  | 0.115  |
| bip_rom3_eur    | 0   | 0.92 | 0.423    | 0.305(233)  | 0.328(198)  | -0.125  | 0.156  |
| bip_st2c_eur    | 0   | 0.96 | 0.00447  | 0.354(634)  | 0.308(1216) | 0.219   | 0.0771 |
| bip_stp1_eur    | 0   | 0.99 | 0.0139   | 0.357(920)  | 0.320(999)  | 0.173   | 0.0702 |
| bip_swa2_eur    | 1   | 0.98 | 0.129    | 0.367(884)  | 0.351(2257) | 0.0919  | 0.0606 |
| bip_swei_eur    | 0   | 1.00 | 0.113    | 0.366(1283) | 0.352(3657) | 0.0762  | 0.0481 |
| bip_top7_eur    | 1   | 0.99 | 0.978    | 0.352(449)  | 0.351(373)  | -0.0029 | 0.106  |
| bip_top8_eur    | 0   | 0.99 | 0.468    | 0.350(149)  | 0.377(293)  | -0.109  | 0.151  |
| bip_ucl2_eur    | 0   | 1.03 | 0.466    | 0.336(726)  | 0.323(693)  | 0.0578  | 0.0793 |
| bip_ucl0_eur    | 0   | 0.95 | 0.0215   | 0.376(441)  | 0.329(495)  | 0.232   | 0.101  |
| bip_ume4_eur    | 0   | 1.01 | 0.743    | 0.344(568)  | 0.351(569)  | -0.0289 | 0.088  |
| bip_usc2_eur    | 0   | 0.98 | 0.427    | 0.334(1297) | 0.344(1156) | -0.0497 | 0.0625 |
| bip_wtcc_eur    | 1   | 1.02 | 0.0148   | 0.361(1636) | 0.332(1632) | 0.127   | 0.052  |
| ms.bip_butr_eur | 0   | 1.02 | 0.00313  | 0.345(236)  | 0.255(236)  | 0.426   | 0.144  |
| ms.bip_uktr_eur | 0   | 0.96 | 0.476    | 0.341(130)  | 0.370(130)  | -0.133  | 0.187  |

PGC\_BIP32b\_mds7a 7 1.00 2.92e-09 0.352(20352) 0.336(31358) 0.0832 0.014

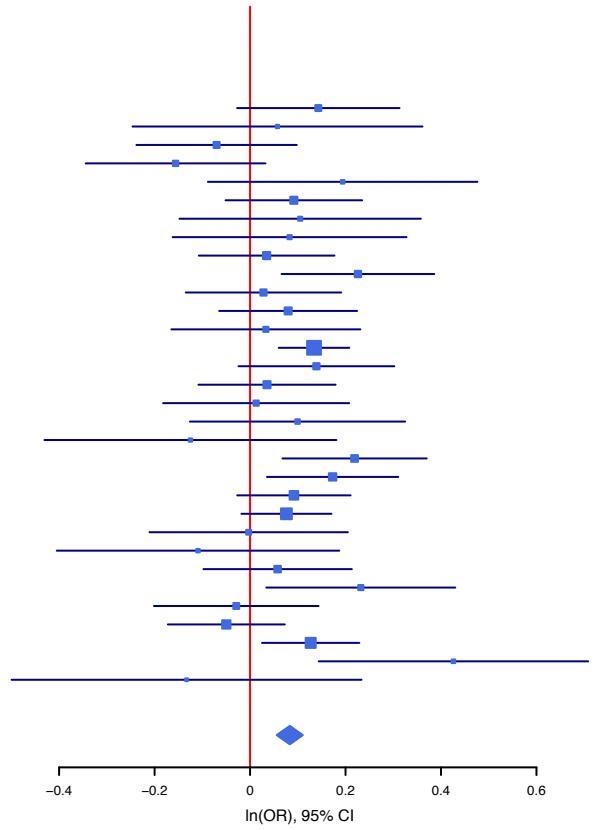

rs7544145 T/C  
 ++++++----+++++-----+++++

1:150138699  
 het\_P: 0.409 het\_I: -2.6

|                 | ngt | info | p_value | f_ca(n)     | f_co(n)     | ln(OR)  | STDerr |
|-----------------|-----|------|---------|-------------|-------------|---------|--------|
| bip_bmau_eur    | 0   | 0.97 | 0.0142  | 0.853(329)  | 0.812(1810) | 0.298   | 0.121  |
| bip_bmg2_eur    | 0   | 1.01 | 0.551   | 0.847(181)  | 0.810(479)  | 0.123   | 0.206  |
| bip_bmg3_eur    | 0   | 0.93 | 0.243   | 0.814(490)  | 0.798(880)  | 0.124   | 0.107  |
| bip_bmpo_eur    | 0   | 0.96 | 0.122   | 0.860(410)  | 0.839(689)  | 0.204   | 0.132  |
| bip_bmsp_eur    | 0   | 0.83 | 0.914   | 0.825(253)  | 0.836(291)  | -0.0199 | 0.185  |
| bip_bonn_eur    | 0   | 0.94 | 0.326   | 0.822(674)  | 0.808(1245) | 0.0907  | 0.0922 |
| bip_dub1_eur    | 0   | 0.98 | 0.0312  | 0.853(150)  | 0.802(796)  | 0.387   | 0.18   |
| bip_edi1_eur    | 0   | 0.96 | 0.975   | 0.815(280)  | 0.817(275)  | 0.00509 | 0.162  |
| bip_fat2_eur    | 0   | 0.92 | 0.363   | 0.832(728)  | 0.820(1106) | 0.0865  | 0.0953 |
| bip_fran_eur    | 0   | 0.95 | 0.188   | 0.830(451)  | 0.810(1630) | 0.136   | 0.103  |
| bip_gain_eur    | 0   | 0.91 | 0.781   | 0.825(703)  | 0.820(603)  | 0.03    | 0.108  |
| bip_gsk1_eur    | 0   | 0.95 | 0.0316  | 0.846(741)  | 0.819(901)  | 0.209   | 0.0974 |
| bip_hal2_eur    | 0   | 0.90 | 0.142   | 0.834(410)  | 0.813(485)  | 0.197   | 0.134  |
| bip_icuk_eur    | 0   | 0.92 | 0.0223  | 0.830(2524) | 0.814(4106) | 0.112   | 0.0491 |
| bip_jst5_eur    | 0   | 0.96 | 0.139   | 0.826(644)  | 0.802(624)  | 0.155   | 0.105  |
| bip_may1_eur    | 0   | 0.91 | 0.719   | 0.810(934)  | 0.806(759)  | 0.0338  | 0.0938 |
| bip_mich_eur    | 0   | 0.96 | 0.406   | 0.820(486)  | 0.811(436)  | 0.104   | 0.125  |
| bip_pf1e_eur    | 0   | 0.92 | 0.185   | 0.813(378)  | 0.795(339)  | 0.191   | 0.144  |
| bip_rom3_eur    | 0   | 0.87 | 0.901   | 0.862(233)  | 0.861(198)  | 0.0269  | 0.217  |
| bip_st2c_eur    | 0   | 0.92 | 0.15    | 0.837(634)  | 0.819(1216) | 0.142   | 0.0987 |
| bip_stp1_eur    | 0   | 0.92 | 0.25    | 0.820(920)  | 0.807(999)  | 0.101   | 0.0878 |
| bip_swa2_eur    | 0   | 0.91 | 0.0244  | 0.824(884)  | 0.800(2257) | 0.176   | 0.0783 |
| bip_swei_eur    | 0   | 0.92 | 0.235   | 0.803(1283) | 0.812(3657) | -0.0725 | 0.061  |
| bip_top7_eur    | 0   | 0.91 | 0.0599  | 0.791(449)  | 0.823(373)  | -0.254  | 0.135  |
| bip_top8_eur    | 0   | 0.94 | 0.569   | 0.815(149)  | 0.799(293)  | 0.108   | 0.19   |
| bip_ucl2_eur    | 0   | 0.88 | 0.737   | 0.806(726)  | 0.800(693)  | 0.0341  | 0.101  |
| bip_uclo_eur    | 0   | 0.92 | 0.12    | 0.828(441)  | 0.802(495)  | 0.196   | 0.126  |
| bip_ume4_eur    | 0   | 0.93 | 0.276   | 0.814(568)  | 0.830(569)  | -0.124  | 0.114  |
| bip_usc2_eur    | 0   | 0.91 | 0.547   | 0.829(1297) | 0.825(1156) | 0.0488  | 0.081  |
| bip_wtcc_eur    | 0   | 0.94 | 0.0555  | 0.829(1636) | 0.811(1632) | 0.128   | 0.067  |
| ms.bip_butr_eur | 0   | 0.92 | 0.946   | 0.831(236)  | 0.833(236)  | -0.0122 | 0.181  |
| ms.bip_uktr_eur | 0   | 1.02 | 0.355   | 0.840(130)  | 0.808(130)  | 0.212   | 0.23   |

**PGC\_BIP32b\_mds7a 0 0.93 4.83e-07 0.825(20352) 0.812(31358) 0.0909 0.0181**

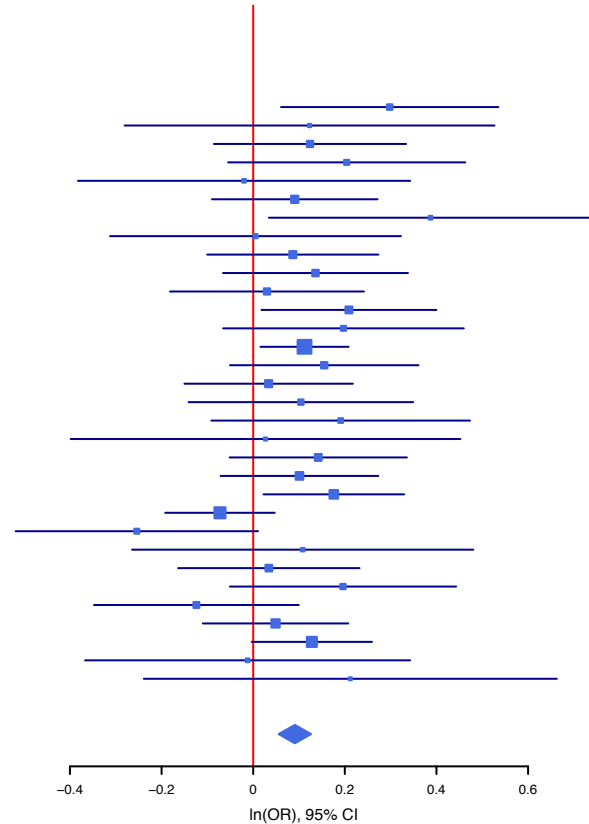

chr10\_111745562\_I I2/D

10:111745562  
het\_P: 0.951 het\_I: 0.0

|                 | ngt | info | p_value  | f_ca(n)     | f_co(n)     | ln(OR)  | STDerr |
|-----------------|-----|------|----------|-------------|-------------|---------|--------|
| bip_bmau_eur    | 0   | 0.94 | 0.855    | 0.171(329)  | 0.171(1810) | -0.0213 | 0.117  |
| bip_bmg2_eur    | 0   | 1.02 | 0.812    | 0.167(181)  | 0.146(479)  | 0.0477  | 0.2    |
| bip_bmg3_eur    | 0   | 0.94 | 0.312    | 0.191(490)  | 0.178(880)  | 0.108   | 0.107  |
| bip_bmpo_eur    | 0   | 0.90 | 0.306    | 0.181(410)  | 0.169(689)  | 0.129   | 0.126  |
| bip_bmsp_eur    | 0   | 0.93 | 0.662    | 0.196(253)  | 0.205(291)  | -0.0716 | 0.164  |
| bip_bonn_eur    | 0   | 0.90 | 0.103    | 0.195(674)  | 0.174(1245) | 0.154   | 0.0942 |
| bip_dub1_eur    | 0   | 0.92 | 0.916    | 0.190(150)  | 0.186(796)  | 0.0178  | 0.168  |
| bip_ed11_eur    | 0   | 0.92 | 0.159    | 0.181(280)  | 0.150(275)  | 0.243   | 0.173  |
| bip_fat2_eur    | 0   | 0.93 | 0.585    | 0.181(728)  | 0.171(1106) | 0.0513  | 0.0939 |
| bip_fran_eur    | 0   | 0.85 | 0.0901   | 0.205(451)  | 0.179(1630) | 0.174   | 0.103  |
| bip_gain_eur    | 0   | 0.89 | 0.707    | 0.168(703)  | 0.162(603)  | 0.0429  | 0.114  |
| bip_gsk1_eur    | 0   | 0.90 | 0.453    | 0.179(741)  | 0.170(901)  | 0.0732  | 0.0975 |
| bip_hal2_eur    | 0   | 0.98 | 0.0177   | 0.234(410)  | 0.191(485)  | 0.286   | 0.12   |
| bip_icuk_eur    | 0   | 0.93 | 0.000786 | 0.185(2524) | 0.162(4106) | 0.165   | 0.0491 |
| bip_jst5_eur    | 0   | 0.91 | 0.75     | 0.168(644)  | 0.172(624)  | -0.0356 | 0.112  |
| bip_may1_eur    | 0   | 0.95 | 0.439    | 0.178(934)  | 0.165(759)  | 0.0748  | 0.0967 |
| bip_mich_eur    | 0   | 0.90 | 0.854    | 0.172(486)  | 0.173(436)  | -0.0241 | 0.131  |
| bip_pf1e_eur    | 0   | 0.96 | 0.59     | 0.163(378)  | 0.167(339)  | -0.0801 | 0.149  |
| bip_rom3_eur    | 0   | 1.00 | 0.473    | 0.203(233)  | 0.221(198)  | -0.122  | 0.17   |
| bip_st2c_eur    | 0   | 0.93 | 0.478    | 0.194(634)  | 0.185(1216) | 0.0665  | 0.0938 |
| bip_stp1_eur    | 0   | 0.93 | 0.565    | 0.178(920)  | 0.178(999)  | 0.0515  | 0.0896 |
| bip_swa2_eur    | 0   | 0.93 | 0.0189   | 0.161(884)  | 0.136(2257) | 0.195   | 0.0833 |
| bip_swei_eur    | 0   | 0.93 | 0.0951   | 0.156(1283) | 0.139(3657) | 0.113   | 0.0674 |
| bip_top7_eur    | 0   | 0.88 | 0.799    | 0.146(449)  | 0.148(373)  | -0.0385 | 0.151  |
| bip_top8_eur    | 0   | 1.03 | 0.71     | 0.174(149)  | 0.155(293)  | 0.0726  | 0.195  |
| bip_ucl2_eur    | 0   | 0.93 | 0.179    | 0.174(726)  | 0.156(693)  | 0.142   | 0.106  |
| bip_uclo_eur    | 0   | 0.96 | 0.416    | 0.202(441)  | 0.184(495)  | 0.0982  | 0.121  |
| bip_ume4_eur    | 0   | 0.93 | 0.586    | 0.130(568)  | 0.123(569)  | 0.0715  | 0.131  |
| bip_usc2_eur    | 0   | 0.97 | 0.015    | 0.194(1297) | 0.168(1156) | 0.19    | 0.0782 |
| bip_wtcc_eur    | 0   | 0.94 | 0.461    | 0.180(1636) | 0.172(1632) | 0.0497  | 0.0675 |
| ms.bip_butr_eur | 0   | 0.99 | 0.41     | 0.232(236)  | 0.210(236)  | 0.13    | 0.158  |
| ms.bip_uktr_eur | 0   | 0.91 | 0.547    | 0.152(130)  | 0.135(130)  | 0.158   | 0.262  |

**PGC\_BIP32b\_mds7a 0 0.93 4.95e-08 0.179(20352) 0.164(31358) 0.0997 0.0183**

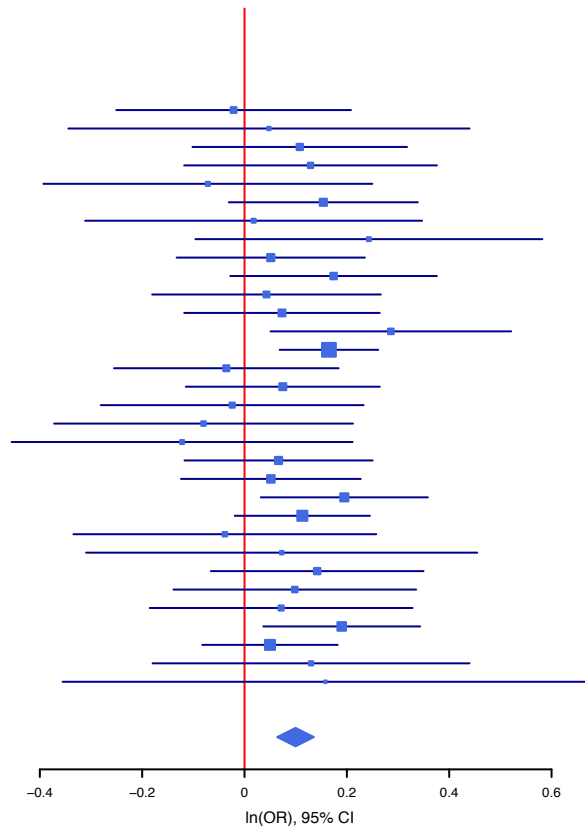



rs10455979 C/G 6:166995260  
 het\_P: 0.343 het\_I: 1.8

|                         | ngt      | info        | p_value        | f_ca(n)             | f_co(n)             | ln(OR)        | STDerr        |
|-------------------------|----------|-------------|----------------|---------------------|---------------------|---------------|---------------|
| bip_bmau_eur            | 0        | 1.02        | 0.285          | 0.506(329)          | 0.531(1810)         | -0.0903       | 0.0844        |
| bip_bmg2_eur            | 0        | 1.06        | 0.0036         | 0.467(181)          | 0.553(479)          | -0.424        | 0.146         |
| bip_bmg3_eur            | 0        | 1.05        | 0.124          | 0.497(490)          | 0.531(880)          | -0.121        | 0.0788        |
| bip_bmpo_eur            | 0        | 0.99        | 0.642          | 0.539(410)          | 0.547(689)          | -0.0431       | 0.0927        |
| bip_bmsp_eur            | 0        | 0.99        | 0.88           | 0.516(253)          | 0.523(291)          | 0.0192        | 0.127         |
| bip_bonn_eur            | 0        | 0.99        | 0.00178        | 0.482(674)          | 0.540(1245)         | -0.219        | 0.07          |
| bip_dub1_eur            | 0        | 0.93        | 0.608          | 0.523(150)          | 0.541(796)          | -0.0674       | 0.132         |
| bip_edi1_eur            | 0        | 0.90        | 0.132          | 0.528(280)          | 0.578(275)          | -0.197        | 0.131         |
| bip_fat2_eur            | 0        | 0.97        | 0.298          | 0.509(728)          | 0.528(1106)         | -0.0728       | 0.07          |
| bip_fran_eur            | 0        | 0.97        | 0.367          | 0.518(451)          | 0.538(1630)         | -0.0698       | 0.0774        |
| bip_gain_eur            | 0        | 0.96        | 0.00286        | 0.498(703)          | 0.552(603)          | -0.243        | 0.0815        |
| bip_gsk1_eur            | 0        | 0.98        | 0.942          | 0.527(741)          | 0.527(901)          | -0.00521      | 0.0712        |
| bip_hal2_eur            | 0        | 0.95        | 0.00375        | 0.495(410)          | 0.558(485)          | -0.29         | 0.1           |
| bip_icuk_eur            | 0        | 0.94        | 0.654          | 0.523(2524)         | 0.526(4106)         | -0.0166       | 0.0371        |
| bip_jst5_eur            | 0        | 0.98        | 0.37           | 0.523(644)          | 0.540(624)          | -0.0724       | 0.0808        |
| bip_may1_eur            | 0        | 0.93        | 0.91           | 0.499(934)          | 0.499(759)          | 0.00827       | 0.0733        |
| bip_mich_eur            | 0        | 0.90        | 0.907          | 0.532(486)          | 0.525(436)          | 0.0116        | 0.0995        |
| bip_pf1e_eur            | 0        | 0.88        | 0.907          | 0.521(378)          | 0.526(399)          | -0.0135       | 0.116         |
| bip_rom3_eur            | 0        | 0.96        | 0.165          | 0.515(233)          | 0.559(198)          | -0.199        | 0.143         |
| bip_st2c_eur            | 0        | 0.83        | 0.995          | 0.533(634)          | 0.532(1216)         | 0.0005        | 0.078         |
| bip_stp1_eur            | 0        | 0.88        | 0.282          | 0.514(920)          | 0.530(999)          | -0.0756       | 0.0703        |
| bip_swa2_eur            | 0        | 0.98        | 0.168          | 0.526(884)          | 0.543(2257)         | -0.0807       | 0.0586        |
| bip_swei_eur            | 0        | 0.99        | 0.0419         | 0.517(1283)         | 0.538(3657)         | -0.095        | 0.0467        |
| bip_top7_eur            | 0        | 0.94        | 0.718          | 0.524(449)          | 0.532(373)          | -0.0376       | 0.104         |
| bip_top8_eur            | 0        | 0.96        | 0.883          | 0.537(149)          | 0.533(293)          | 0.0217        | 0.147         |
| bip_ucl2_eur            | 0        | 0.98        | 0.774          | 0.498(726)          | 0.492(693)          | 0.022         | 0.0764        |
| bip_uclo_eur            | 0        | 0.85        | 0.289          | 0.502(441)          | 0.526(495)          | -0.107        | 0.101         |
| bip_ume4_eur            | 0        | 1.01        | 0.134          | 0.562(568)          | 0.591(569)          | -0.128        | 0.0855        |
| bip_usc2_eur            | 0        | 0.94        | 0.498          | 0.510(1297)         | 0.520(1156)         | -0.041        | 0.0606        |
| bip_wtcc_eur            | 0        | 0.85        | 0.227          | 0.520(1636)         | 0.533(1632)         | -0.0656       | 0.0543        |
| ms.bip_butr_eur         | 0        | 0.93        | 0.0435         | 0.457(236)          | 0.520(236)          | -0.275        | 0.136         |
| ms.bip_uktr_eur         | 0        | 0.90        | 0.864          | 0.515(130)          | 0.522(130)          | -0.0316       | 0.185         |
| <b>PGC_BIP32b_mds7a</b> | <b>0</b> | <b>0.95</b> | <b>4.6e-08</b> | <b>0.515(20352)</b> | <b>0.534(31358)</b> | <b>-0.075</b> | <b>0.0137</b> |

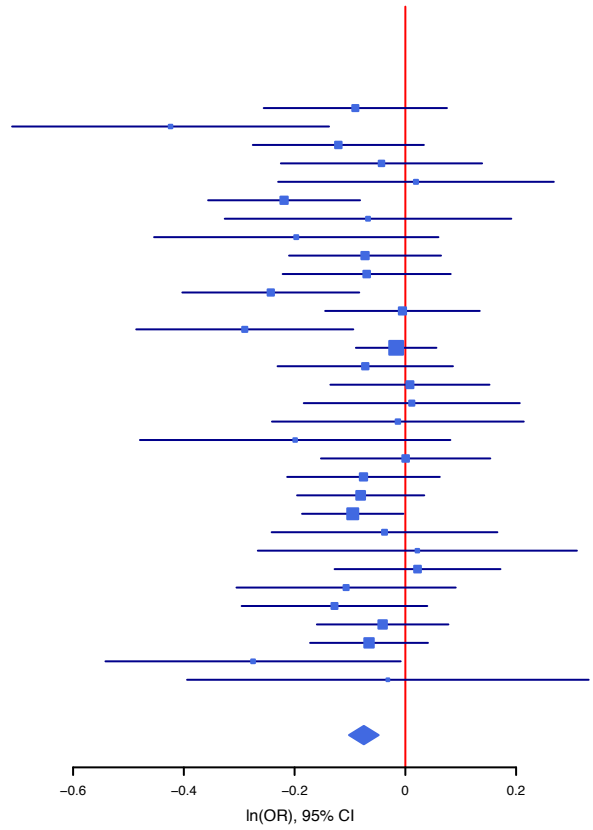



rs10035291 T/C 5:80796368  
 ++++++--++++++-----+++++  
 het\_P: 0.877 het\_I: 0.0

|                 | ngt | info | p_value | f_ca(n)     | f_co(n)     | ln(OR)  | STDerr |
|-----------------|-----|------|---------|-------------|-------------|---------|--------|
| bip_bmau_eur    | 0   | 0.94 | 0.671   | 0.685(329)  | 0.676(1810) | 0.0401  | 0.0945 |
| bip_bmg2_eur    | 0   | 0.96 | 0.893   | 0.713(181)  | 0.664(479)  | 0.0223  | 0.166  |
| bip_bmg3_eur    | 0   | 0.92 | 0.811   | 0.677(490)  | 0.684(880)  | -0.0215 | 0.0903 |
| bip_bmpo_eur    | 0   | 0.92 | 0.116   | 0.709(410)  | 0.670(689)  | 0.163   | 0.104  |
| bip_bmsp_eur    | 0   | 0.96 | 0.8     | 0.682(253)  | 0.681(291)  | -0.0351 | 0.139  |
| bip_bonn_eur    | 0   | 1.00 | 0.672   | 0.689(674)  | 0.683(1245) | 0.0315  | 0.0745 |
| bip_dub1_eur    | 0   | 0.88 | 0.437   | 0.701(150)  | 0.680(796)  | 0.114   | 0.147  |
| bip_ed1_eur     | 0   | 0.95 | 0.414   | 0.625(280)  | 0.646(275)  | -0.107  | 0.131  |
| bip_fat2_eur    | 0   | 0.96 | 0.812   | 0.668(728)  | 0.669(1106) | 0.0177  | 0.075  |
| bip_fran_eur    | 0   | 0.94 | 0.757   | 0.680(451)  | 0.672(1630) | 0.0261  | 0.0842 |
| bip_gain_eur    | 0   | 0.98 | 0.443   | 0.675(703)  | 0.662(603)  | 0.0653  | 0.0851 |
| bip_gsk1_eur    | 0   | 1.00 | 0.429   | 0.682(741)  | 0.670(901)  | 0.0595  | 0.0752 |
| bip_hal2_eur    | 0   | 0.93 | 0.723   | 0.664(410)  | 0.675(485)  | -0.0377 | 0.106  |
| bip_icuk_eur    | 0   | 0.94 | 0.0391  | 0.675(2524) | 0.659(4106) | 0.0813  | 0.0394 |
| bip_jst5_eur    | 0   | 0.96 | 0.642   | 0.685(644)  | 0.677(624)  | 0.0406  | 0.0873 |
| bip_may1_eur    | 0   | 0.93 | 0.517   | 0.679(934)  | 0.673(759)  | 0.0508  | 0.0784 |
| bip_mich_eur    | 0   | 0.93 | 0.595   | 0.677(486)  | 0.668(436)  | 0.0556  | 0.105  |
| bip_pf1e_eur    | 0   | 0.94 | 0.192   | 0.668(378)  | 0.697(339)  | -0.158  | 0.121  |
| bip_rom3_eur    | 0   | 1.01 | 0.615   | 0.710(233)  | 0.688(198)  | 0.0758  | 0.151  |
| bip_st2c_eur    | 0   | 0.92 | 0.224   | 0.695(634)  | 0.675(1216) | 0.0973  | 0.0799 |
| bip_stp1_eur    | 0   | 0.92 | 0.284   | 0.690(920)  | 0.672(999)  | 0.0788  | 0.0736 |
| bip_swa2_eur    | 0   | 0.96 | 0.00944 | 0.731(884)  | 0.699(2257) | 0.17    | 0.0656 |
| bip_swei_eur    | 0   | 0.97 | 0.0195  | 0.718(1283) | 0.693(3657) | 0.121   | 0.0518 |
| bip_top7_eur    | 0   | 1.01 | 0.0799  | 0.713(449)  | 0.675(373)  | 0.191   | 0.109  |
| bip_top8_eur    | 0   | 0.95 | 0.0474  | 0.750(149)  | 0.690(293)  | 0.334   | 0.168  |
| bip_ucl2_eur    | 0   | 0.97 | 0.1     | 0.708(726)  | 0.681(693)  | 0.137   | 0.0832 |
| bip_ucl0_eur    | 0   | 1.02 | 0.539   | 0.677(441)  | 0.661(495)  | 0.0603  | 0.0984 |
| bip_ume4_eur    | 0   | 0.93 | 0.0452  | 0.731(568)  | 0.695(569)  | 0.194   | 0.0967 |
| bip_usc2_eur    | 0   | 0.93 | 0.404   | 0.663(1297) | 0.656(1156) | 0.0533  | 0.0639 |
| bip_wtcc_eur    | 0   | 0.93 | 0.0532  | 0.687(1636) | 0.666(1632) | 0.107   | 0.0553 |
| ms.bip_butr_eur | 0   | 0.93 | 0.245   | 0.707(236)  | 0.673(236)  | 0.17    | 0.146  |
| ms.bip_uktr_eur | 0   | 0.89 | 0.098   | 0.691(130)  | 0.625(130)  | 0.329   | 0.199  |

PGC\_BIP32b\_mds7a 0 0.95 1.15e-07 0.688(20352) 0.675(31358) 0.0779 0.0147

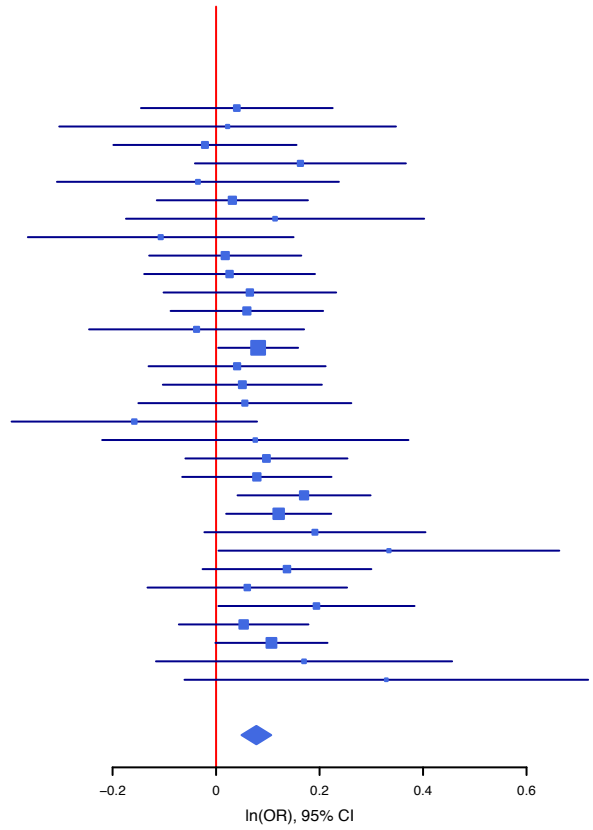

chr5\_7587236\_D I2/D 5:7587236  
 ----+++++-----+++++-----+++++ het\_P: 0.697 het\_I: 0.0

|                         | ngt      | info        | p_value         | f_ca(n)             | f_co(n)             | ln(OR)         | STDerr        |
|-------------------------|----------|-------------|-----------------|---------------------|---------------------|----------------|---------------|
| bip_bmau_eur            | 0        | 0.96        | 0.452           | 0.812(329)          | 0.824(1810)         | -0.0844        | 0.112         |
| bip_bmg2_eur            | 0        | 0.98        | 0.0304          | 0.773(181)          | 0.818(479)          | -0.412         | 0.19          |
| bip_bmg3_eur            | 0        | 0.91        | 0.743           | 0.811(490)          | 0.818(880)          | -0.0356        | 0.108         |
| bip_bmpo_eur            | 0        | 0.87        | 0.154           | 0.761(410)          | 0.784(689)          | -0.167         | 0.117         |
| bip_bmsp_eur            | 0        | 0.97        | 0.0846          | 0.821(253)          | 0.861(291)          | -0.304         | 0.176         |
| bip_bonn_eur            | 0        | 0.93        | 0.0129          | 0.794(674)          | 0.823(1245)         | -0.227         | 0.0912        |
| bip_dub1_eur            | 0        | 0.99        | 0.0742          | 0.768(150)          | 0.814(796)          | -0.273         | 0.153         |
| bip_edi1_eur            | 0        | 0.89        | 0.739           | 0.813(280)          | 0.812(275)          | -0.0556        | 0.167         |
| bip_fat2_eur            | 0        | 0.89        | 0.851           | 0.830(728)          | 0.827(1106)         | 0.0181         | 0.097         |
| bip_fran_eur            | 0        | 0.92        | 0.179           | 0.806(451)          | 0.825(1630)         | -0.136         | 0.101         |
| bip_gain_eur            | 0        | 0.97        | 0.957           | 0.816(703)          | 0.815(603)          | -0.00562       | 0.103         |
| bip_gsk1_eur            | 0        | 0.96        | 0.0644          | 0.797(741)          | 0.822(901)          | -0.169         | 0.0916        |
| bip_hal2_eur            | 0        | 0.93        | 0.442           | 0.820(410)          | 0.832(485)          | -0.101         | 0.131         |
| bip_icuk_eur            | 0        | 0.93        | 0.0756          | 0.817(2524)         | 0.828(4106)         | -0.0863        | 0.0486        |
| bip_jst5_eur            | 0        | 0.96        | 0.746           | 0.822(644)          | 0.817(624)          | 0.0343         | 0.106         |
| bip_may1_eur            | 0        | 0.95        | 0.772           | 0.834(934)          | 0.827(759)          | 0.028          | 0.0966        |
| bip_mich_eur            | 0        | 0.92        | 0.0428          | 0.791(486)          | 0.826(436)          | -0.256         | 0.126         |
| bip_pf1e_eur            | 0        | 0.91        | 0.949           | 0.836(378)          | 0.835(339)          | 0.00985        | 0.154         |
| bip_rom3_eur            | 0        | 0.94        | 0.674           | 0.809(233)          | 0.796(198)          | 0.0754         | 0.179         |
| bip_st2c_eur            | 0        | 0.89        | 0.293           | 0.844(634)          | 0.834(1216)         | 0.108          | 0.102         |
| bip_stp1_eur            | 0        | 0.83        | 0.062           | 0.812(920)          | 0.834(999)          | -0.177         | 0.0948        |
| bip_swa2_eur            | 0        | 0.90        | 0.386           | 0.810(884)          | 0.819(2257)         | -0.0671        | 0.0774        |
| bip_swei_eur            | 0        | 0.95        | 0.0241          | 0.787(1283)         | 0.807(3657)         | -0.132         | 0.0586        |
| bip_top7_eur            | 0        | 0.91        | 0.338           | 0.829(449)          | 0.846(373)          | -0.137         | 0.143         |
| bip_top8_eur            | 0        | 0.91        | 0.916           | 0.835(149)          | 0.833(293)          | -0.0216        | 0.206         |
| bip_ucl2_eur            | 0        | 0.96        | 0.221           | 0.815(726)          | 0.835(693)          | -0.124         | 0.101         |
| bip_ucl0_eur            | 0        | 0.85        | 0.0262          | 0.808(441)          | 0.843(495)          | -0.298         | 0.134         |
| bip_ume4_eur            | 0        | 0.90        | 0.167           | 0.786(568)          | 0.807(569)          | -0.153         | 0.111         |
| bip_usc2_eur            | 0        | 0.93        | 0.707           | 0.825(1297)         | 0.824(1156)         | -0.03          | 0.0798        |
| bip_wtcc_eur            | 0        | 0.87        | 0.365           | 0.811(1636)         | 0.818(1632)         | -0.0623        | 0.0688        |
| ms.bip_buttr_eur        | 0        | 0.96        | 0.802           | 0.796(236)          | 0.803(236)          | -0.0416        | 0.166         |
| ms.bip_uktr_eur         | 0        | 1.03        | 0.523           | 0.761(130)          | 0.785(130)          | -0.132         | 0.207         |
| <b>PGC_BIP32b_mds7a</b> | <b>0</b> | <b>0.93</b> | <b>1.24e-07</b> | <b>0.811(20352)</b> | <b>0.822(31358)</b> | <b>-0.0946</b> | <b>0.0179</b> |

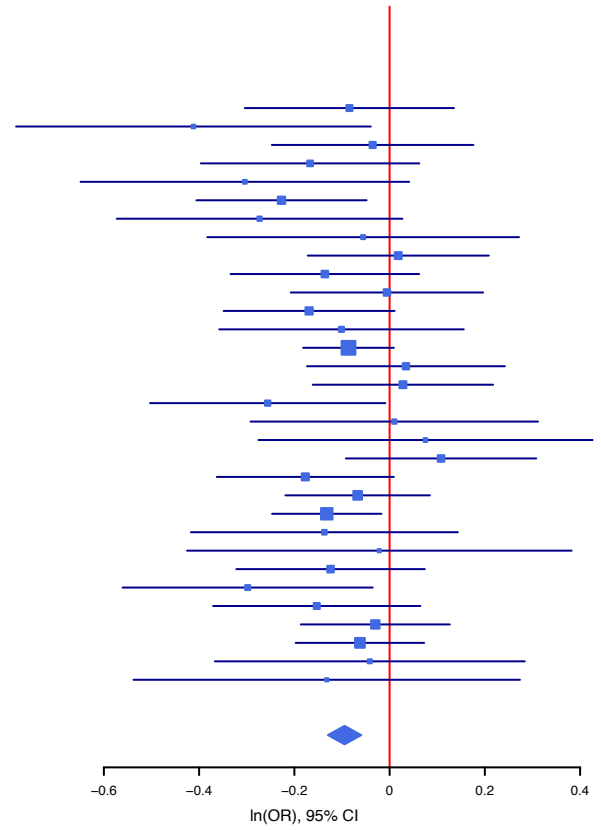

chr15\_85357857\_I I2/D 15:85357857  
 ++++++----- het\_P: 0.499 het\_I: 0.0

|                         | ngt      | info        | p_value         | f_ca(n)             | f_co(n)             | ln(OR)         | STDerr        |
|-------------------------|----------|-------------|-----------------|---------------------|---------------------|----------------|---------------|
| bip_bmau_eur            | 0        | 0.95        | 0.351           | 0.244(329)          | 0.264(1810)         | -0.0944        | 0.101         |
| bip_bmg2_eur            | 0        | 1.02        | 0.117           | 0.270(181)          | 0.314(479)          | -0.254         | 0.162         |
| bip_bmg3_eur            | 0        | 0.96        | 0.217           | 0.266(490)          | 0.291(880)          | -0.114         | 0.0923        |
| bip_bmpo_eur            | 0        | 0.98        | 0.677           | 0.266(410)          | 0.259(689)          | 0.0434         | 0.104         |
| bip_bmsp_eur            | 0        | 0.96        | 0.0332          | 0.254(253)          | 0.309(291)          | -0.309         | 0.145         |
| bip_bonn_eur            | 0        | 0.95        | 0.393           | 0.268(674)          | 0.277(1245)         | -0.0684        | 0.0801        |
| bip_dub1_eur            | 0        | 0.98        | 0.588           | 0.258(150)          | 0.247(796)          | 0.08           | 0.148         |
| bip_edi1_eur            | 0        | 0.88        | 0.178           | 0.265(280)          | 0.295(275)          | -0.197         | 0.147         |
| bip_fat2_eur            | 0        | 0.96        | 0.284           | 0.268(728)          | 0.281(1106)         | -0.0856        | 0.0799        |
| bip_fran_eur            | 0        | 0.98        | 0.803           | 0.287(451)          | 0.289(1630)         | -0.0212        | 0.085         |
| bip_gain_eur            | 0        | 0.98        | 0.685           | 0.256(703)          | 0.264(603)          | -0.0371        | 0.0915        |
| bip_gsk1_eur            | 0        | 0.99        | 0.688           | 0.273(741)          | 0.281(901)          | -0.0319        | 0.0793        |
| bip_hal2_eur            | 0        | 1.02        | 0.249           | 0.278(410)          | 0.303(485)          | -0.122         | 0.106         |
| bip_icuk_eur            | 0        | 0.98        | 0.00834         | 0.251(2524)         | 0.272(4106)         | -0.11          | 0.0415        |
| bip_jst5_eur            | 0        | 0.97        | 0.425           | 0.286(644)          | 0.301(624)          | -0.0715        | 0.0895        |
| bip_may1_eur            | 0        | 0.95        | 0.241           | 0.281(934)          | 0.299(759)          | -0.0938        | 0.08          |
| bip_mich_eur            | 0        | 0.98        | 0.0569          | 0.259(486)          | 0.298(436)          | -0.203         | 0.107         |
| bip_pf1e_eur            | 0        | 1.01        | 0.958           | 0.270(378)          | 0.265(339)          | -0.00652       | 0.123         |
| bip_rom3_eur            | 0        | 0.96        | 0.0348          | 0.309(233)          | 0.377(198)          | -0.317         | 0.15          |
| bip_st2c_eur            | 0        | 0.94        | 0.274           | 0.265(634)          | 0.289(1216)         | -0.0903        | 0.0826        |
| bip_stp1_eur            | 0        | 0.97        | 0.683           | 0.271(920)          | 0.272(999)          | 0.0309         | 0.0755        |
| bip_swa2_eur            | 0        | 0.97        | 0.395           | 0.268(884)          | 0.280(2257)         | -0.0558        | 0.0657        |
| bip_swei_eur            | 0        | 0.97        | 0.472           | 0.263(1283)         | 0.271(3657)         | -0.0383        | 0.0532        |
| bip_top7_eur            | 0        | 0.96        | 0.0347          | 0.249(449)          | 0.293(373)          | -0.247         | 0.117         |
| bip_top8_eur            | 0        | 1.00        | 0.524           | 0.254(149)          | 0.273(293)          | -0.104         | 0.164         |
| bip_ucl2_eur            | 0        | 0.96        | 0.0939          | 0.270(726)          | 0.298(693)          | -0.143         | 0.0856        |
| bip_ucl0_eur            | 0        | 0.98        | 0.0958          | 0.226(441)          | 0.261(495)          | -0.184         | 0.111         |
| bip_ume4_eur            | 0        | 1.00        | 0.791           | 0.297(568)          | 0.301(569)          | -0.0246        | 0.0926        |
| bip_usc2_eur            | 0        | 0.97        | 0.778           | 0.284(1297)         | 0.278(1156)         | 0.0186         | 0.0661        |
| bip_wtcc_eur            | 0        | 0.94        | 0.00519         | 0.251(1636)         | 0.282(1632)         | -0.163         | 0.0584        |
| ms.bip_buttr_eur        | 0        | 1.01        | 0.0782          | 0.323(236)          | 0.378(236)          | -0.241         | 0.137         |
| ms.bip_uktr_eur         | 0        | 0.92        | 0.00788         | 0.224(130)          | 0.324(130)          | -0.565         | 0.212         |
| <b>PGC_BIP32b_mds7a</b> | <b>0</b> | <b>0.97</b> | <b>8.55e-09</b> | <b>0.266(20352)</b> | <b>0.281(31358)</b> | <b>-0.0877</b> | <b>0.0152</b> |

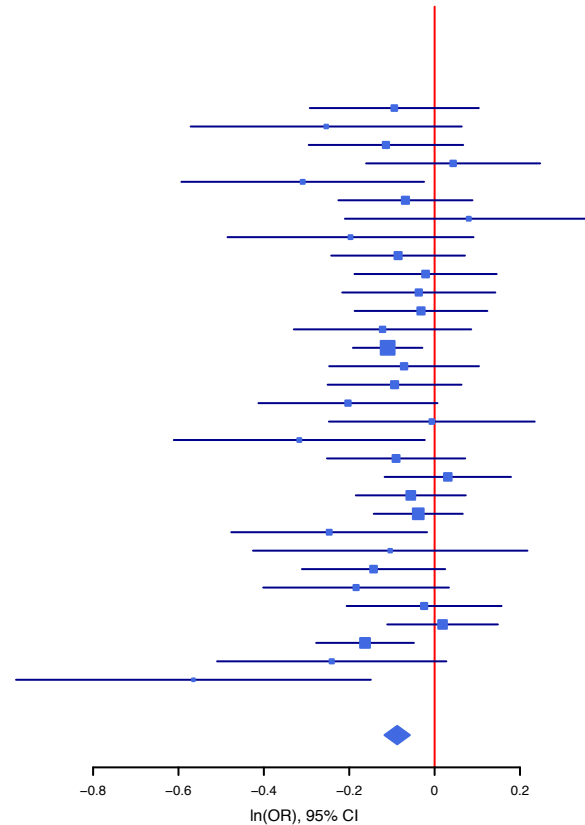



chr2\_97376407\_I I2/D  
 ++++++-----

2:97376407  
 het\_P: 0.238 het\_I: 8.9

|                         | ngt      | info        | p_value         | f_ca(n)             | f_co(n)             | ln(OR)         | STDerr        |
|-------------------------|----------|-------------|-----------------|---------------------|---------------------|----------------|---------------|
| bip_bmau_eur            | 0        | 0.97        | 0.798           | 0.318(329)          | 0.324(1810)         | -0.0237        | 0.0928        |
| bip_bmg2_eur            | 0        | 0.99        | 0.714           | 0.337(181)          | 0.359(479)          | -0.0576        | 0.157         |
| bip_bmg3_eur            | 0        | 0.99        | 0.881           | 0.340(490)          | 0.339(880)          | -0.0128        | 0.0857        |
| bip_bmpo_eur            | 0        | 0.94        | 0.505           | 0.367(410)          | 0.382(689)          | -0.0653        | 0.0978        |
| bip_bmsp_eur            | 0        | 0.90        | 0.00249         | 0.217(253)          | 0.300(291)          | -0.477         | 0.158         |
| bip_bonn_eur            | 0        | 0.97        | 0.0293          | 0.325(674)          | 0.377(1245)         | -0.163         | 0.075         |
| bip_dub1_eur            | 0        | 1.00        | 0.0016          | 0.219(150)          | 0.312(796)          | -0.48          | 0.152         |
| bip_edi1_eur            | 0        | 1.04        | 0.137           | 0.301(280)          | 0.348(275)          | -0.192         | 0.129         |
| bip_fat2_eur            | 0        | 0.92        | 0.127           | 0.305(728)          | 0.334(1106)         | -0.118         | 0.0774        |
| bip_fran_eur            | 0        | 0.95        | 0.0624          | 0.272(451)          | 0.307(1630)         | -0.162         | 0.0871        |
| bip_gain_eur            | 0        | 0.97        | 0.0788          | 0.290(703)          | 0.329(603)          | -0.154         | 0.0878        |
| bip_gsk1_eur            | 0        | 0.96        | 0.924           | 0.318(741)          | 0.317(901)          | -0.00743       | 0.0778        |
| bip_hal2_eur            | 0        | 0.96        | 0.876           | 0.325(410)          | 0.322(485)          | -0.0164        | 0.105         |
| bip_icuk_eur            | 0        | 0.94        | 0.0192          | 0.314(2524)         | 0.337(4106)         | -0.0931        | 0.0398        |
| bip_jst5_eur            | 0        | 0.99        | 0.281           | 0.297(644)          | 0.321(624)          | -0.0946        | 0.0877        |
| bip_may1_eur            | 0        | 0.98        | 0.789           | 0.316(934)          | 0.335(759)          | -0.0205        | 0.0767        |
| bip_mich_eur            | 0        | 0.91        | 0.189           | 0.303(486)          | 0.332(436)          | -0.14          | 0.106         |
| bip_pf1e_eur            | 0        | 0.96        | 0.106           | 0.349(378)          | 0.311(339)          | 0.193          | 0.119         |
| bip_rom3_eur            | 0        | 0.98        | 0.338           | 0.280(233)          | 0.255(198)          | 0.153          | 0.16          |
| bip_st2c_eur            | 0        | 0.99        | 0.94            | 0.302(634)          | 0.302(1216)         | -0.00592       | 0.0782        |
| bip_stp1_eur            | 0        | 0.93        | 0.222           | 0.306(920)          | 0.328(999)          | -0.09          | 0.0737        |
| bip_swa2_eur            | 0        | 0.99        | 0.134           | 0.360(884)          | 0.379(2257)         | -0.0901        | 0.0602        |
| bip_swei_eur            | 0        | 0.97        | 0.0072          | 0.351(1283)         | 0.380(3657)         | -0.132         | 0.049         |
| bip_top7_eur            | 0        | 1.07        | 0.639           | 0.368(449)          | 0.386(373)          | -0.0472        | 0.101         |
| bip_top8_eur            | 0        | 0.93        | 0.297           | 0.359(149)          | 0.402(293)          | -0.162         | 0.155         |
| bip_ucl2_eur            | 0        | 0.96        | 0.6             | 0.350(726)          | 0.361(693)          | -0.0422        | 0.0803        |
| bip_ucl0_eur            | 0        | 0.94        | 0.856           | 0.315(441)          | 0.320(495)          | -0.0188        | 0.104         |
| bip_ume4_eur            | 0        | 0.98        | 0.665           | 0.351(568)          | 0.343(569)          | 0.0386         | 0.0894        |
| bip_usc2_eur            | 0        | 1.01        | 0.194           | 0.301(1297)         | 0.325(1156)         | -0.0822        | 0.0633        |
| bip_wtcc_eur            | 0        | 0.97        | 0.0296          | 0.312(1636)         | 0.341(1632)         | -0.118         | 0.0541        |
| ms.bip_butr_eur         | 0        | 0.95        | 0.425           | 0.299(236)          | 0.276(236)          | 0.118          | 0.148         |
| ms.bip_uktr_eur         | 0        | 0.99        | 0.104           | 0.286(130)          | 0.352(130)          | -0.312         | 0.192         |
| <b>PGC_BIP32b_mds7a</b> | <b>0</b> | <b>0.97</b> | <b>5.77e-09</b> | <b>0.318(20352)</b> | <b>0.342(31358)</b> | <b>-0.0845</b> | <b>0.0145</b> |

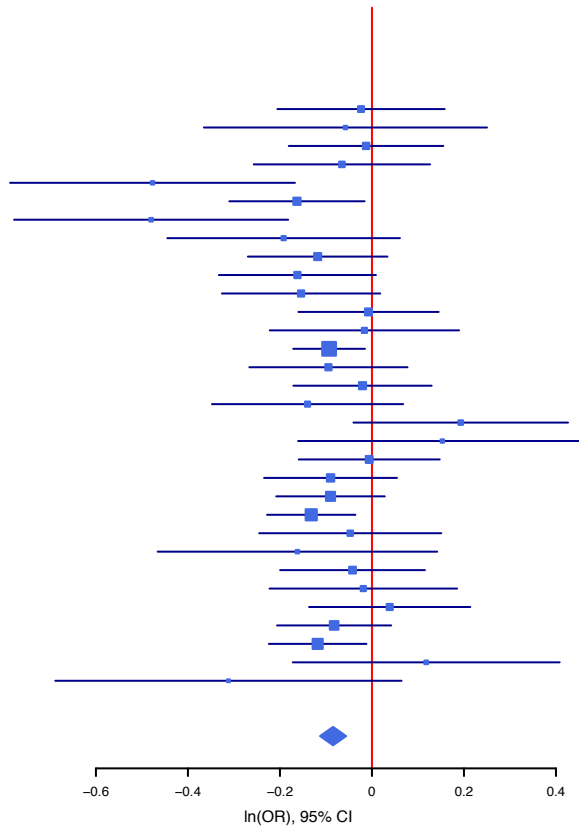

rs2302417 A/T

3:52814256  
het\_P: 0.199 het\_I: 11.8

|                 | ngt | info | p_value | f_ca(n)     | f_co(n)     | ln(OR)  | STDerr |
|-----------------|-----|------|---------|-------------|-------------|---------|--------|
| bip_bmau_eur    | 0   | 1.00 | 0.505   | 0.446(329)  | 0.462(1810) | -0.0572 | 0.0858 |
| bip_bmg2_eur    | 0   | 0.98 | 0.434   | 0.561(181)  | 0.488(479)  | 0.12    | 0.153  |
| bip_bmg3_eur    | 0   | 1.00 | 0.288   | 0.472(490)  | 0.496(880)  | -0.0861 | 0.081  |
| bip_bmpo_eur    | 0   | 0.96 | 0.0358  | 0.499(410)  | 0.546(689)  | -0.197  | 0.094  |
| bip_bmbsp_eur   | 0   | 0.90 | 0.349   | 0.476(253)  | 0.516(291)  | -0.125  | 0.134  |
| bip_bonn_eur    | 0   | 0.97 | 0.00436 | 0.470(674)  | 0.515(1245) | -0.202  | 0.0707 |
| bip_dub1_eur    | 0   | 1.00 | 0.439   | 0.424(150)  | 0.446(796)  | -0.0995 | 0.129  |
| bip_ed11_eur    | 0   | 0.88 | 0.419   | 0.469(280)  | 0.443(275)  | 0.107   | 0.133  |
| bip_fat2_eur    | 0   | 1.01 | 0.311   | 0.485(728)  | 0.499(1106) | -0.0698 | 0.0688 |
| bip_fran_eur    | 0   | 0.96 | 0.327   | 0.496(451)  | 0.475(1630) | 0.0765  | 0.0781 |
| bip_gain_eur    | 0   | 0.94 | 0.411   | 0.467(703)  | 0.479(603)  | -0.0673 | 0.0818 |
| bip_gsk1_eur    | 0   | 0.96 | 0.00902 | 0.456(741)  | 0.502(901)  | -0.189  | 0.0722 |
| bip_hal2_eur    | 0   | 0.96 | 0.57    | 0.482(410)  | 0.501(485)  | -0.0559 | 0.0985 |
| bip_icuk_eur    | 0   | 0.97 | 0.00063 | 0.450(2524) | 0.480(4106) | -0.125  | 0.0367 |
| bip_jst5_eur    | 0   | 0.99 | 0.0534  | 0.482(644)  | 0.444(624)  | 0.157   | 0.0811 |
| bip_may1_eur    | 0   | 0.98 | 0.277   | 0.482(934)  | 0.501(759)  | -0.078  | 0.0717 |
| bip_mich_eur    | 0   | 1.06 | 0.012   | 0.454(486)  | 0.517(436)  | -0.232  | 0.0923 |
| bip_pf1e_eur    | 0   | 1.01 | 0.502   | 0.468(378)  | 0.482(339)  | -0.0731 | 0.109  |
| bip_rom3_eur    | 0   | 1.03 | 0.531   | 0.500(233)  | 0.521(198)  | -0.0854 | 0.137  |
| bip_st2c_eur    | 0   | 0.94 | 0.0127  | 0.466(634)  | 0.512(1216) | -0.182  | 0.073  |
| bip_stp1_eur    | 0   | 0.94 | 0.642   | 0.472(920)  | 0.484(999)  | -0.0316 | 0.0678 |
| bip_swa2_eur    | 0   | 0.98 | 0.693   | 0.487(884)  | 0.494(2257) | -0.023  | 0.0581 |
| bip_swei_eur    | 0   | 0.99 | 0.112   | 0.484(1283) | 0.502(3657) | -0.0735 | 0.0463 |
| bip_top7_eur    | 0   | 0.98 | 0.894   | 0.481(449)  | 0.474(373)  | 0.0135  | 0.101  |
| bip_top8_eur    | 0   | 0.95 | 0.251   | 0.489(149)  | 0.448(293)  | 0.17    | 0.148  |
| bip_ucl2_eur    | 0   | 0.96 | 0.714   | 0.498(726)  | 0.506(693)  | -0.0282 | 0.0771 |
| bip_ucl0_eur    | 0   | 1.00 | 0.206   | 0.452(441)  | 0.483(495)  | -0.118  | 0.0936 |
| bip_ume4_eur    | 0   | 0.95 | 0.899   | 0.505(568)  | 0.506(569)  | -0.011  | 0.0863 |
| bip_usc2_eur    | 0   | 0.94 | 0.0763  | 0.465(1297) | 0.492(1156) | -0.107  | 0.0602 |
| bip_wtcc_eur    | 0   | 0.94 | 0.0646  | 0.454(1636) | 0.476(1632) | -0.0954 | 0.0516 |
| ms.bip_butr_eur | 0   | 0.88 | 0.66    | 0.518(236)  | 0.531(236)  | -0.061  | 0.139  |
| ms.bip_uktr_eur | 0   | 0.99 | 0.13    | 0.397(130)  | 0.462(130)  | -0.272  | 0.179  |

PGC\_BIP32b\_mds7a 0 0.97 4.93e-09 0.472(20352) 0.490(31358) -0.0793 0.0136

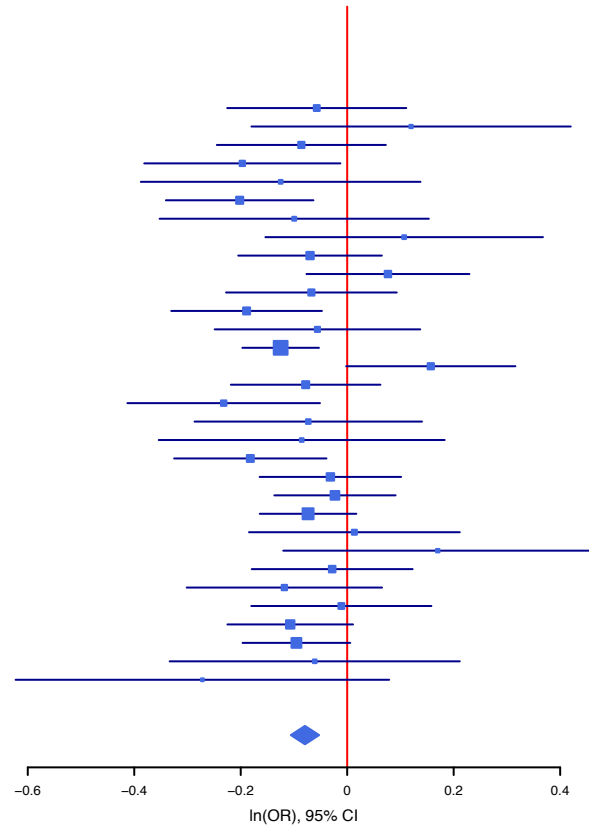

rs7188321 T/C 7:105048158  
 het\_P: 0.467 het\_I: 0.0

|                         | ngt      | info        | p_value         | f_ca(n)             | f_co(n)             | ln(OR)         | STDerr        |
|-------------------------|----------|-------------|-----------------|---------------------|---------------------|----------------|---------------|
| bip_bmau_eur            | 0        | 0.86        | 0.0763          | 0.304(329)          | 0.336(1810)         | -0.176         | 0.0994        |
| bip_bmg2_eur            | 0        | 0.84        | 0.26            | 0.310(181)          | 0.331(479)          | -0.196         | 0.174         |
| bip_bmg3_eur            | 0        | 0.81        | 0.317           | 0.312(490)          | 0.326(880)          | -0.0967        | 0.0966        |
| bip_bmpo_eur            | 0        | 0.79        | 0.0825          | 0.326(410)          | 0.360(689)          | -0.189         | 0.109         |
| bip_bmsp_eur            | 0        | 0.81        | 0.843           | 0.310(253)          | 0.304(291)          | -0.0304        | 0.153         |
| bip_bonn_eur            | 0        | 0.82        | 0.135           | 0.292(674)          | 0.319(1245)         | -0.125         | 0.0833        |
| bip_dub1_eur            | 0        | 0.81        | 0.913           | 0.352(150)          | 0.351(796)          | 0.016          | 0.147         |
| bip_ed1_eur             | 0        | 0.79        | 0.861           | 0.304(280)          | 0.312(275)          | -0.0261        | 0.149         |
| bip_fat2_eur            | 0        | 0.79        | 0.389           | 0.304(728)          | 0.310(1106)         | -0.0726        | 0.0841        |
| bip_fran_eur            | 0        | 0.81        | 0.197           | 0.304(451)          | 0.327(1630)         | -0.118         | 0.0911        |
| bip_gain_eur            | 0        | 0.81        | 0.784           | 0.336(703)          | 0.330(603)          | 0.0256         | 0.0932        |
| bip_gsk1_eur            | 0        | 0.83        | 0.492           | 0.327(741)          | 0.319(901)          | 0.057          | 0.0829        |
| bip_hal2_eur            | 0        | 0.79        | 0.275           | 0.319(410)          | 0.340(485)          | -0.126         | 0.115         |
| bip_icuk_eur            | 0        | 0.83        | 0.319           | 0.318(2524)         | 0.325(4106)         | -0.0423        | 0.0424        |
| bip_jst5_eur            | 0        | 0.87        | 0.555           | 0.338(644)          | 0.347(624)          | -0.0532        | 0.0901        |
| bip_may1_eur            | 0        | 0.86        | 0.994           | 0.314(934)          | 0.316(759)          | 0.0007         | 0.0823        |
| bip_mich_eur            | 0        | 0.85        | 0.697           | 0.329(486)          | 0.337(436)          | -0.0423        | 0.108         |
| bip_pf1e_eur            | 0        | 0.84        | 0.857           | 0.324(378)          | 0.321(339)          | -0.0229        | 0.127         |
| bip_rom3_eur            | 0        | 0.84        | 0.0627          | 0.291(233)          | 0.341(198)          | -0.306         | 0.165         |
| bip_st2c_eur            | 0        | 0.81        | 0.263           | 0.325(634)          | 0.338(1216)         | -0.0934        | 0.0834        |
| bip_stp1_eur            | 0        | 0.81        | 0.0544          | 0.306(920)          | 0.330(999)          | -0.152         | 0.0789        |
| bip_swa2_eur            | 0        | 0.83        | 0.00165         | 0.305(884)          | 0.342(2257)         | -0.215         | 0.0683        |
| bip_swei_eur            | 0        | 0.86        | 0.0214          | 0.322(1283)         | 0.346(3657)         | -0.123         | 0.0533        |
| bip_top7_eur            | 0        | 0.83        | 0.00021         | 0.292(449)          | 0.373(373)          | -0.443         | 0.119         |
| bip_top8_eur            | 0        | 0.93        | 0.242           | 0.302(149)          | 0.341(293)          | -0.191         | 0.164         |
| bip_ucl2_eur            | 0        | 0.84        | 0.269           | 0.293(726)          | 0.311(693)          | -0.0992        | 0.0897        |
| bip_uclo_eur            | 0        | 0.74        | 0.248           | 0.290(441)          | 0.310(495)          | -0.137         | 0.119         |
| bip_ume4_eur            | 0        | 0.84        | 0.485           | 0.365(568)          | 0.379(569)          | -0.0669        | 0.0958        |
| bip_usc2_eur            | 0        | 0.85        | 0.869           | 0.325(1297)         | 0.324(1156)         | 0.0111         | 0.0678        |
| bip_wtcc_eur            | 0        | 0.84        | 0.316           | 0.328(1636)         | 0.336(1632)         | -0.0581        | 0.0579        |
| ms.bip_butr_eur         | 0        | 0.86        | 0.391           | 0.340(236)          | 0.316(236)          | 0.128          | 0.15          |
| ms.bip_uktr_eur         | 0        | 0.90        | 0.795           | 0.310(130)          | 0.320(130)          | -0.0517        | 0.199         |
| <b>PGC_BIP32b_mds7a</b> | <b>0</b> | <b>0.83</b> | <b>7.02e-08</b> | <b>0.317(20352)</b> | <b>0.333(31358)</b> | <b>-0.0844</b> | <b>0.0157</b> |

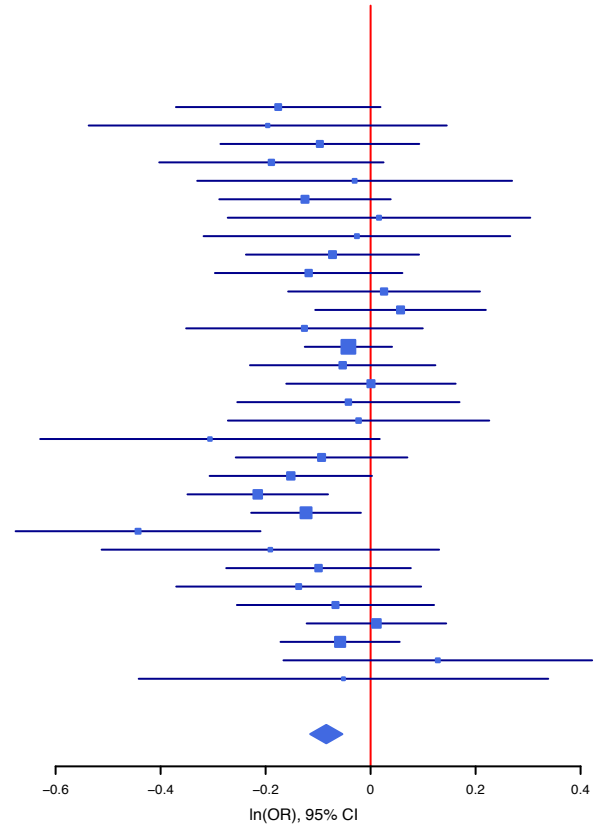

Supplement: NIHMS1524328-supplement-4.pdf [file NIHMS1524328-supplement-4.pdf]
