# Supplementary material
Source: PubMed Central journal article supplement (PMC6956732)

Supplemental Data 1-3. Regional association plots (1), forest plots for discovery GWAS studies (2) and forest plots for follow-up studies (3), for all 31 lead SNPs in the 30 genome-wide significant loci. Each multi-figure PDF below is a separate supplemental data piece.

Supplemental Data 1. Regional association plots.

Supplemental Data 2. Forest plots of the 32 primary GWAS datasets.

Supplemental Data 3. Forest plots of the 7 followup datasets.









chr7\_140700006\_I D/I 7:140700006  
 het\_P: 0.72 het\_I: 0.0

|                  | info        | p_value        | f_ca(n)            | f_co(n)             | ln(OR)        | STDerr       |
|------------------|-------------|----------------|--------------------|---------------------|---------------|--------------|
| JJ EAST          | 0.89        | 0.095          | 0.23(377)          | 0.25(754)           | -0.15         | 0.12         |
| KFO              | 0.85        | 0.39           | 0.73(252)          | 0.73(288)           | -0.044        | 0.15         |
| NORMENT          | 0.9         | 0.17           | 0.24(313)          | 0.27(4015)          | -0.14         | 0.15         |
| PsychChip        | 0.87        | 0.0048         | 0.26(5273)         | 0.27(8286)          | -0.091        | 0.035        |
| TGEN             | 0.86        | 0.07           | 0.26(1049)         | 0.28(685)           | -0.13         | 0.085        |
| DECODE           | 0.94        | 0.58           | 0.25(791)          | 0.25(118972)        | 0.01          | 0.051        |
| iPSYCH           | 0.88        | 0.048          | 0.24(839)          | 0.26(2938)          | -0.12         | 0.07         |
| <b>Discovery</b> | <b>0.88</b> | <b>9.4e-08</b> | <b>0.24(20352)</b> | <b>0.25(31358)</b>  | <b>-0.088</b> | <b>0.017</b> |
| <b>Follow-up</b> | <b>0.88</b> | <b>0.0015</b>  | <b>0.27(8894)</b>  | <b>0.25(135938)</b> | <b>-0.077</b> | <b>0.024</b> |
| <b>Combined</b>  | <b>0.88</b> | <b>6.2e-10</b> | <b>0.25(29246)</b> | <b>0.25(167296)</b> | <b>-0.085</b> | <b>0.014</b> |

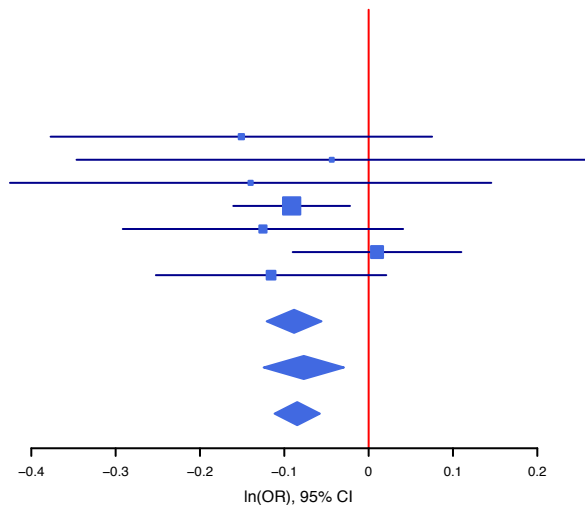

chr2\_194465711\_D I/D 2:194465711  
 het\_P: 0.63 het\_I: 0.0

|                  | info        | p_value        | f_ca(n)            | f_co(n)             | ln(OR)        | STDerr       |
|------------------|-------------|----------------|--------------------|---------------------|---------------|--------------|
| JJ EAST          | 0.99        | 0.39           | 0.38(377)          | 0.4(754)            | -0.026        | 0.095        |
| KFO              | 0.97        | 0.24           | 0.39(252)          | 0.4(288)            | -0.092        | 0.13         |
| NORMENT          | 0.96        | 0.39           | 0.57(313)          | 0.57(4015)          | -0.032        | 0.12         |
| PsychChip        | 0.98        | 0.28           | 0.59(5273)         | 0.59(8286)          | -0.018        | 0.03         |
| TGEN             | 0.96        | 0.031          | 0.39(1049)         | 0.42(685)           | -0.14         | 0.073        |
| DECODE           | 1           | 0.031          | 0.42(791)          | 0.45(118972)        | -0.08         | 0.043        |
| iPSYCH           | 0.96        | 0.022          | 0.4(839)           | 0.42(2938)          | -0.12         | 0.058        |
| <b>Discovery</b> | <b>0.98</b> | <b>2.3e-08</b> | <b>0.4(20352)</b>  | <b>0.41(31358)</b>  | <b>-0.077</b> | <b>0.014</b> |
| <b>Follow-up</b> | <b>0.98</b> | <b>0.0063</b>  | <b>0.52(8894)</b>  | <b>0.46(135938)</b> | <b>-0.056</b> | <b>0.02</b>  |
| <b>Combined</b>  | <b>0.98</b> | <b>7.9e-10</b> | <b>0.44(29246)</b> | <b>0.45(167296)</b> | <b>-0.07</b>  | <b>0.011</b> |

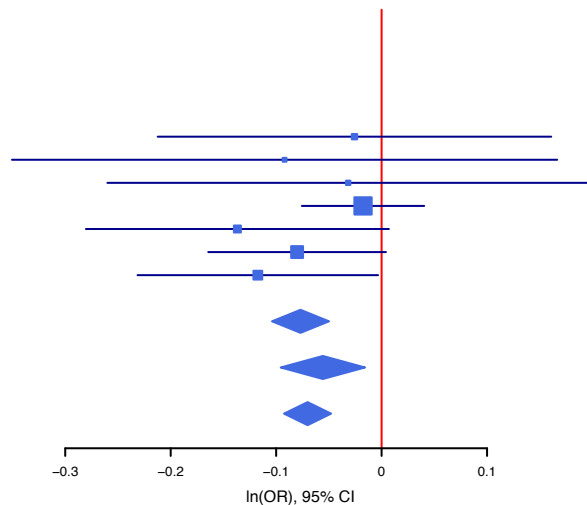

rs12226877

A/G 11: 61591907

het\_P: 0.24 het\_I: 23.4

|                  | info        | p_value        | f_ca(n)            | f_co(n)             | ln(OR)       | STDerr       |
|------------------|-------------|----------------|--------------------|---------------------|--------------|--------------|
| JJ EAST          | 0.76        | 0.15           | 0.29(377)          | 0.28(754)           | 0.12         | 0.12         |
| KFO              | 0.82        | 0.8            | 0.27(252)          | 0.29(288)           | -0.13        | 0.16         |
| NORMENT          | 0.87        | 0.0038         | 0.36(313)          | 0.32(4015)          | 0.34         | 0.13         |
| PsychChip        | 0.83        | 0.2            | 0.28(5273)         | 0.28(8286)          | 0.03         | 0.035        |
| TGEN             | 0.82        | 0.11           | 0.31(1049)         | 0.29(685)           | 0.11         | 0.085        |
| DECODE           | 1           | 0.14           | 0.41(791)          | 0.39(118972)        | 0.048        | 0.059        |
| iPSYCH           | 0.83        | 0.071          | 0.31(839)          | 0.29(2938)          | 0.099        | 0.067        |
| <b>Discovery</b> | <b>0.84</b> | <b>1.2e-08</b> | <b>0.31(20352)</b> | <b>0.29(31358)</b>  | <b>0.091</b> | <b>0.016</b> |
| <b>Follow-up</b> | <b>0.85</b> | <b>0.015</b>   | <b>0.3(8894)</b>   | <b>0.38(135938)</b> | <b>0.06</b>  | <b>0.025</b> |
| <b>Combined</b>  | <b>0.84</b> | <b>9.9e-10</b> | <b>0.31(29246)</b> | <b>0.36(167296)</b> | <b>0.082</b> | <b>0.013</b> |

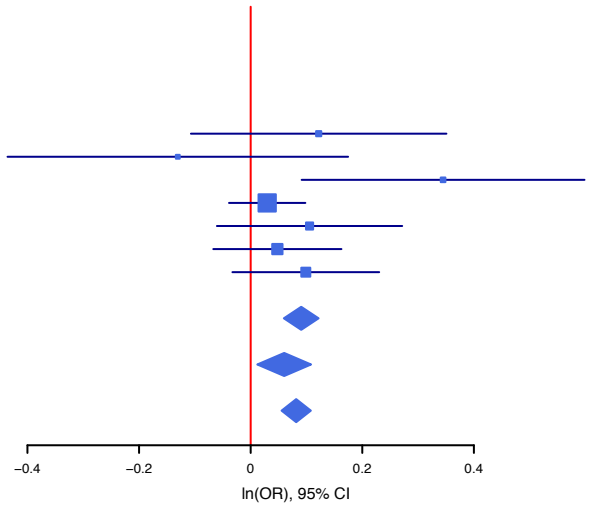



**rs73188321**      **T/C 7:105048158**  
 het\_P:            0.072    het\_I:    46.2

|                  | info        | p_value        | f_ca(n)            | f_co(n)             | ln(OR)        | STDerr       |
|------------------|-------------|----------------|--------------------|---------------------|---------------|--------------|
| JJ EAST          | 0.81        | 0.8            | 0.38(377)          | 0.36(754)           | 0.087         | 0.11         |
| KFO              | 0.97        | 0.14           | 0.33(252)          | 0.35(288)           | -0.15         | 0.14         |
| NORMENT          | 0.84        | 0.00049        | 0.32(313)          | 0.34(4015)          | -0.45         | 0.14         |
| PsychChip        | 0.9         | 0.003          | 0.32(5273)         | 0.34(8286)          | -0.088        | 0.032        |
| TGEN             | 0.79        | 0.58           | 0.33(1049)         | 0.32(685)           | 0.016         | 0.084        |
| DECODE           | 1           | 0.25           | 0.31(791)          | 0.32(118972)        | -0.03         | 0.045        |
| iPSYCH           | 0.92        | 0.22           | 0.33(839)          | 0.33(2938)          | -0.048        | 0.062        |
| <b>Discovery</b> | <b>0.83</b> | <b>7e-08</b>   | <b>0.32(20352)</b> | <b>0.33(31358)</b>  | <b>-0.084</b> | <b>0.016</b> |
| <b>Follow-up</b> | <b>0.9</b>  | <b>0.003</b>   | <b>0.32(8894)</b>  | <b>0.32(135938)</b> | <b>-0.065</b> | <b>0.022</b> |
| <b>Combined</b>  | <b>0.85</b> | <b>1.1e-09</b> | <b>0.32(29246)</b> | <b>0.32(167296)</b> | <b>-0.078</b> | <b>0.013</b> |

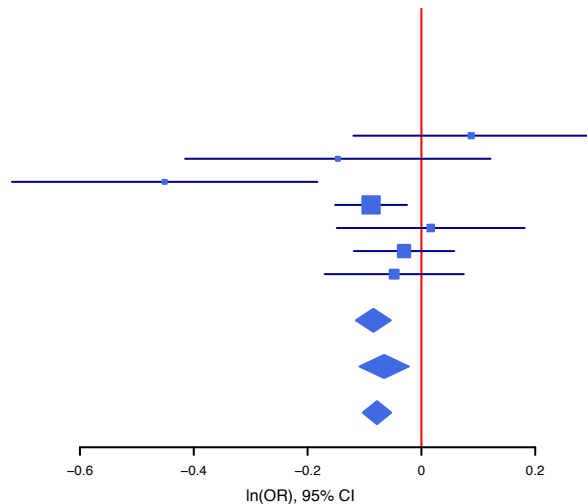

rs111444407

T/C 19: 19358207

het\_P: 0.37 het\_I: 7.6

|                  | info        | p_value        | f_ca(n)            | f_co(n)             | ln(OR)       | STDerr       |
|------------------|-------------|----------------|--------------------|---------------------|--------------|--------------|
| JJ EAST          | 0.91        | 0.29           | 0.14(377)          | 0.13(754)           | 0.077        | 0.14         |
| KFO              | 1.1         | 0.37           | 0.17(252)          | 0.16(288)           | 0.055        | 0.16         |
| NORMENT          | 0.99        | 0.73           | 0.86(313)          | 0.86(4015)          | -0.1         | 0.17         |
| PsychChip        | 0.99        | 0.3            | 0.18(5273)         | 0.17(8286)          | 0.02         | 0.038        |
| TGEN             | 0.97        | 0.12           | 0.15(1049)         | 0.14(685)           | 0.12         | 0.1          |
| DECODE           | 1           | 0.1            | 0.16(791)          | 0.14(118972)        | 0.076        | 0.059        |
| iPSYCH           | 0.96        | 0.4            | 0.14(839)          | 0.14(2938)          | 0.02         | 0.082        |
| <b>Discovery</b> | <b>0.99</b> | <b>2.4e-10</b> | <b>0.17(20352)</b> | <b>0.15(31358)</b>  | <b>0.12</b>  | <b>0.018</b> |
| <b>Follow-up</b> | <b>0.99</b> | <b>0.15</b>    | <b>0.19(8894)</b>  | <b>0.16(135938)</b> | <b>0.039</b> | <b>0.027</b> |
| <b>Combined</b>  | <b>0.99</b> | <b>1.3e-09</b> | <b>0.18(29246)</b> | <b>0.16(167296)</b> | <b>0.093</b> | <b>0.015</b> |

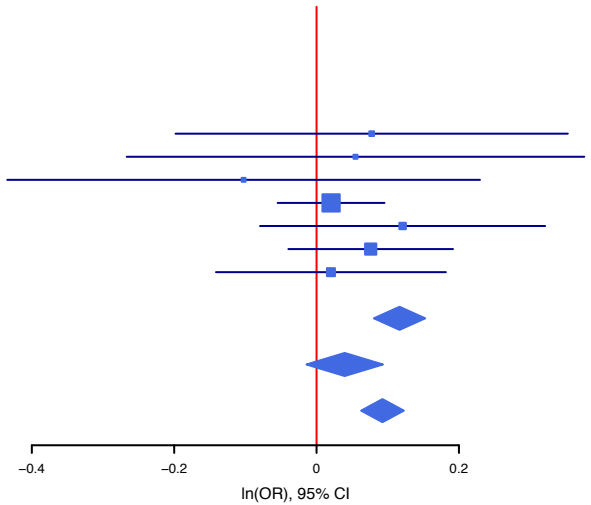

| <b>rs17183814</b> |                | <b>A/G</b>     |                     | <b>2:166152389</b>   |                    |
|-------------------|----------------|----------------|---------------------|----------------------|--------------------|
|                   |                | het_P:         | 0.29                | het_I:               | 17.2               |
| <b>info</b>       | <b>p_value</b> | <b>f_ca(n)</b> | <b>f_co(n)</b>      | <b>ln(OR)</b>        | <b>STDerr</b>      |
| JJ EAST           | 0.93           | 0.1            | 0.054(377)          | 0.067(754)           | -0.26 0.21         |
| KFO               | 1.1            | 0.16           | 0.071(252)          | 0.085(288)           | -0.23 0.23         |
| NORMENT           | 1              | 0.26           | 0.066(313)          | 0.079(4015)          | -0.15 0.23         |
| PsychChip         | 0.99           | 0.18           | 0.065(5273)         | 0.071(8286)          | -0.054 0.058       |
| TGEN              | 0.99           | 0.16           | 0.069(1049)         | 0.078(685)           | -0.13 0.13         |
| DECODE            | 1              | 0.00027        | 0.06(791)           | 0.08(118972)         | -0.29 0.085        |
| iPSYCH            | 1              | 0.58           | 0.085(839)          | 0.085(2938)          | 0.021 0.1          |
| <b>Discovery</b>  | <b>0.94</b>    | <b>1.5e-07</b> | <b>0.068(20352)</b> | <b>0.075(31358)</b>  | <b>-0.14 0.027</b> |
| <b>Follow-up</b>  | <b>1</b>       | <b>0.0033</b>  | <b>0.067(8894)</b>  | <b>0.079(135938)</b> | <b>-0.11 0.039</b> |
| <b>Combined</b>   | <b>0.96</b>    | <b>2e-09</b>   | <b>0.068(29246)</b> | <b>0.079(167296)</b> | <b>-0.13 0.022</b> |

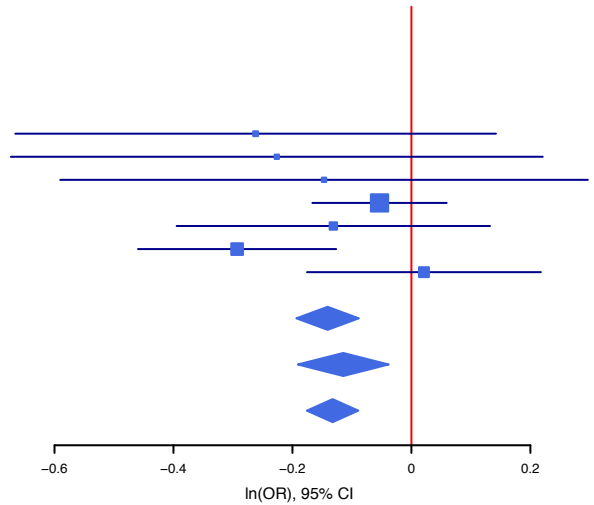

| rs113779084      |             | A/G 7: 11871787 |                    | het_P: 0.16        | het_I: 33.8        |
|------------------|-------------|-----------------|--------------------|--------------------|--------------------|
| info             | p_value     | f_ca(n)         | f_co(n)            | ln(OR)             | STDerr             |
| JJ EAST          | 0.96        | 7.7e-05         | 0.43(377)          | 0.35(754)          | 0.37 0.097         |
| KFO              | 0.87        | 0.19            | 0.3(252)           | 0.27(288)          | 0.13 0.15          |
| NORMENT          | 0.98        | 0.15            | 0.28(313)          | 0.27(4015)         | 0.14 0.13          |
| PsychChip        | 0.93        | 0.02            | 0.28(5273)         | 0.27(8286)         | 0.069 0.034        |
| TGEN             | 1           | 0.36            | 0.32(1049)         | 0.31(685)          | 0.028 0.075        |
| DECODE           | 1           | 0.063           | 0.32(791)          | 0.3(118972)        | 0.07 0.046         |
| iPSYCH           | 0.91        | 0.042           | 0.31(839)          | 0.29(2938)         | 0.11 0.064         |
| <b>Discovery</b> | <b>0.97</b> | <b>7.3e-06</b>  | <b>0.31(20352)</b> | <b>0.3(31358)</b>  | <b>0.066 0.015</b> |
| <b>Follow-up</b> | <b>0.94</b> | <b>5.7e-05</b>  | <b>0.3(8894)</b>   | <b>0.3(135938)</b> | <b>0.09 0.022</b>  |
| <b>Combined</b>  | <b>0.96</b> | <b>2.5e-09</b>  | <b>0.31(29246)</b> | <b>0.3(167296)</b> | <b>0.073 0.012</b> |

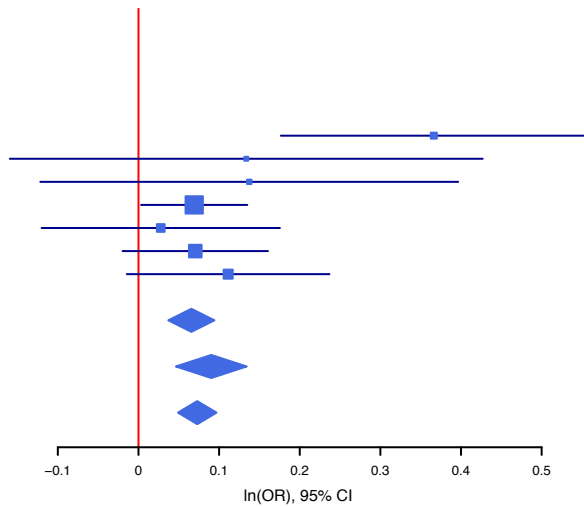

chr2\_97376407\_I I/D 2: 97376407  
 het\_P: 0.36 het\_I: 9.6

|                  | info        | p_value        | f_ca(n)            | f_co(n)             | ln(OR)        | STDerr       |
|------------------|-------------|----------------|--------------------|---------------------|---------------|--------------|
| JJ EAST          | 0.97        | 0.34           | 0.37(377)          | 0.39(754)           | -0.039        | 0.096        |
| KFO              | 0.91        | 0.058          | 0.33(252)          | 0.35(288)           | -0.22         | 0.14         |
| NORMENT          | 0.99        | 0.14           | 0.34(313)          | 0.38(4015)          | -0.13         | 0.12         |
| PsychChip        | 0.98        | 0.1            | 0.28(5273)         | 0.3(8286)           | -0.041        | 0.032        |
| TGEN             | 0.96        | 0.53           | 0.32(1049)         | 0.32(685)           | 0.0058        | 0.077        |
| DECODE           | 1           | 0.59           | 0.34(791)          | 0.33(118972)        | 0.011         | 0.046        |
| iPSYCH           | 0.96        | 0.04           | 0.36(839)          | 0.38(2938)          | -0.1          | 0.06         |
| <b>Discovery</b> | <b>0.97</b> | <b>5.8e-09</b> | <b>0.32(20352)</b> | <b>0.34(31358)</b>  | <b>-0.085</b> | <b>0.015</b> |
| <b>Follow-up</b> | <b>0.98</b> | <b>0.059</b>   | <b>0.3(8894)</b>   | <b>0.33(135938)</b> | <b>-0.041</b> | <b>0.022</b> |
| <b>Combined</b>  | <b>0.97</b> | <b>3.8e-09</b> | <b>0.32(29246)</b> | <b>0.33(167296)</b> | <b>-0.071</b> | <b>0.012</b> |

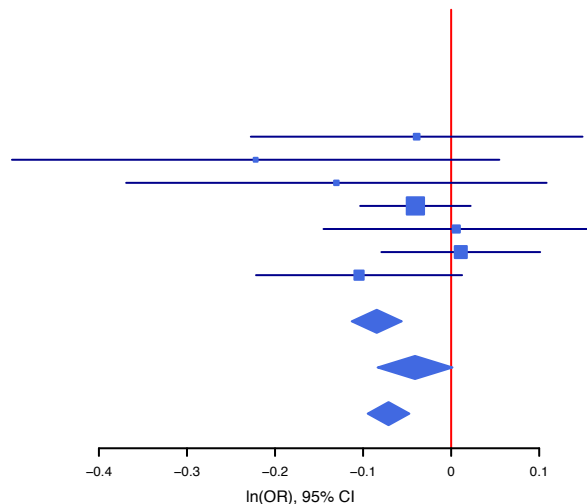

rs2388334

A/G 6: 98591622

het\_P: 0.21 het\_I: 26.9

|                  | info     | p_value        | f_ca(n)           | f_co(n)             | ln(OR)        | STDerr       |
|------------------|----------|----------------|-------------------|---------------------|---------------|--------------|
| JJ EAST          | 1        | 0.39           | 0.56(377)         | 0.57(754)           | -0.025        | 0.092        |
| KFO              | 0.98     | 0.45           | 0.47(252)         | 0.48(288)           | -0.018        | 0.13         |
| NORMENT          | 1        | 0.91           | 0.57(313)         | 0.53(4015)          | 0.15          | 0.12         |
| PsychChip        | 1        | 0.0067         | 0.51(5273)        | 0.52(8286)          | -0.071        | 0.029        |
| TGEN             | 1        | 0.91           | 0.5(1049)         | 0.47(685)           | 0.096         | 0.071        |
| DECODE           | 1        | 0.03           | 0.46(791)         | 0.5(118972)         | -0.081        | 0.043        |
| iPSYCH           | 1        | 0.073          | 0.5(839)          | 0.52(2938)          | -0.082        | 0.056        |
| <b>Discovery</b> | <b>1</b> | <b>8.6e-08</b> | <b>0.5(20352)</b> | <b>0.52(31358)</b>  | <b>-0.071</b> | <b>0.013</b> |
| <b>Follow-up</b> | <b>1</b> | <b>0.01</b>    | <b>0.51(8894)</b> | <b>0.5(135938)</b>  | <b>-0.051</b> | <b>0.02</b>  |
| <b>Combined</b>  | <b>1</b> | <b>4e-09</b>   | <b>0.5(29246)</b> | <b>0.51(167296)</b> | <b>-0.065</b> | <b>0.011</b> |

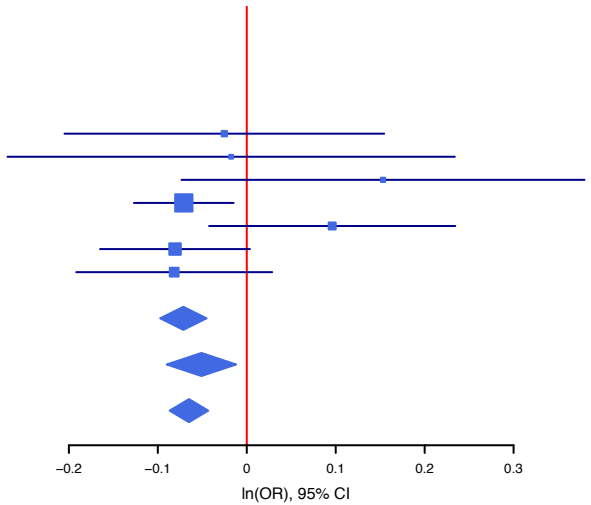

rs10994318 C/G 10: 62125856  
 het\_P: 0.27 het\_I: 20.1

|                  | info     | p_value        | f_ca(n)             | f_co(n)              | ln(OR)      | STDerr       |
|------------------|----------|----------------|---------------------|----------------------|-------------|--------------|
| JJ EAST          | 1        | 0.9            | 0.11(377)           | 0.13(754)            | -0.19       | 0.14         |
| KFO              | 1.1      | 0.014          | 0.081(252)          | 0.047(288)           | 0.57        | 0.26         |
| NORMENT          | 1        | 0.22           | 0.069(313)          | 0.064(4015)          | 0.18        | 0.23         |
| PsychChip        | 1        | 0.016          | 0.057(5273)         | 0.053(8286)          | 0.14        | 0.063        |
| TGEN             | 0.98     | 0.43           | 0.053(1049)         | 0.053(685)           | 0.026       | 0.16         |
| DECODE           | 1        | 0.081          | 0.055(791)          | 0.048(118972)        | 0.13        | 0.095        |
| iPSYCH           | 1        | 0.037          | 0.06(839)           | 0.051(2938)          | 0.22        | 0.12         |
| <b>Discovery</b> | <b>1</b> | <b>4.5e-07</b> | <b>0.065(20352)</b> | <b>0.057(31358)</b>  | <b>0.14</b> | <b>0.028</b> |
| <b>Follow-up</b> | <b>1</b> | <b>0.0041</b>  | <b>0.06(8894)</b>   | <b>0.049(135938)</b> | <b>0.12</b> | <b>0.043</b> |
| <b>Combined</b>  | <b>1</b> | <b>6.8e-09</b> | <b>0.063(29246)</b> | <b>0.051(167296)</b> | <b>0.14</b> | <b>0.023</b> |

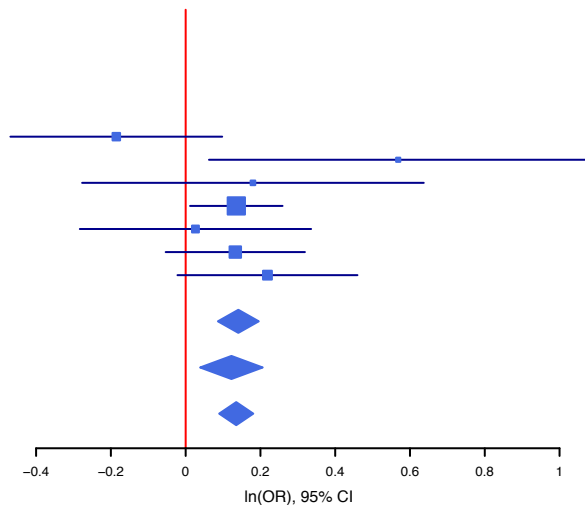

| rs12575685       |             | A/G 11: 70517927 |                    | het_P:              | 0.55         | het_I:       | 0.0 |
|------------------|-------------|------------------|--------------------|---------------------|--------------|--------------|-----|
| info             | p_value     | f_ca(n)          | f_co(n)            | ln(OR)              | STDerr       |              |     |
| JJ EAST          | 0.89        | 0.74             | 0.33(377)          | 0.35(754)           | -0.067       | 0.1          |     |
| KFO              | 0.91        | 0.49             | 0.67(252)          | 0.66(288)           | 0.004        | 0.14         |     |
| NORMENT          | 1           | 0.14             | 0.35(313)          | 0.33(4015)          | 0.13         | 0.12         |     |
| PsychChip        | 0.9         | 0.0066           | 0.31(5273)         | 0.31(8286)          | 0.081        | 0.033        |     |
| TGEN             | 0.92        | 0.41             | 0.32(1049)         | 0.31(685)           | 0.018        | 0.079        |     |
| DECODE           | 1           | 0.013            | 0.36(791)          | 0.33(118972)        | 0.1          | 0.045        |     |
| iPSYCH           | 0.91        | 0.0033           | 0.36(839)          | 0.33(2938)          | 0.17         | 0.062        |     |
| <b>Discovery</b> | <b>0.96</b> | <b>1.2e-05</b>   | <b>0.32(20352)</b> | <b>0.31(31358)</b>  | <b>0.064</b> | <b>0.015</b> |     |
| <b>Follow-up</b> | <b>0.92</b> | <b>0.00011</b>   | <b>0.33(8894)</b>  | <b>0.33(135938)</b> | <b>0.085</b> | <b>0.022</b> |     |
| <b>Combined</b>  | <b>0.95</b> | <b>7.7e-09</b>   | <b>0.32(29246)</b> | <b>0.33(167296)</b> | <b>0.07</b>  | <b>0.012</b> |     |

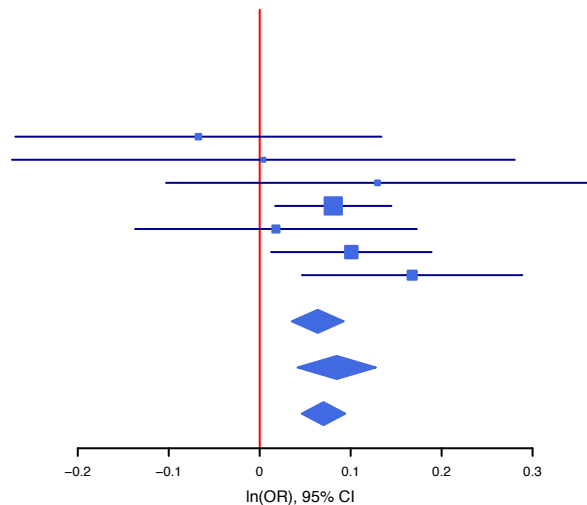





chr20\_43682549\_I I/D 20: 43682549  
 het\_P: 0.95 het\_I: 0.0

|                  | info        | p_value        | f_ca(n)            | f_co(n)             | ln(OR)        | STDerr       |
|------------------|-------------|----------------|--------------------|---------------------|---------------|--------------|
| JJ EAST          | 0.91        | 0.2            | 0.31(377)          | 0.33(754)           | -0.087        | 0.1          |
| KFO              | 0.94        | 0.65           | 0.3(252)           | 0.29(288)           | 0.057         | 0.14         |
| NORMENT          | 0.96        | 0.22           | 0.25(313)          | 0.26(4015)          | -0.11         | 0.14         |
| PsychChip        | 0.94        | 0.053          | 0.28(5273)         | 0.29(8286)          | -0.053        | 0.033        |
| TGEN             | 0.95        | 0.17           | 0.28(1049)         | 0.29(685)           | -0.076        | 0.079        |
| DECODE           | 1           | 0.023          | 0.3(791)           | 0.33(118972)        | -0.092        | 0.049        |
| iPSYCH           | 0.93        | 0.37           | 0.27(839)          | 0.27(2938)          | -0.021        | 0.066        |
| <b>Discovery</b> | <b>0.93</b> | <b>3e-07</b>   | <b>0.27(20352)</b> | <b>0.28(31358)</b>  | <b>-0.08</b>  | <b>0.015</b> |
| <b>Follow-up</b> | <b>0.95</b> | <b>0.0086</b>  | <b>0.28(8894)</b>  | <b>0.32(135938)</b> | <b>-0.06</b>  | <b>0.023</b> |
| <b>Combined</b>  | <b>0.94</b> | <b>1.1e-08</b> | <b>0.27(29246)</b> | <b>0.32(167296)</b> | <b>-0.073</b> | <b>0.013</b> |

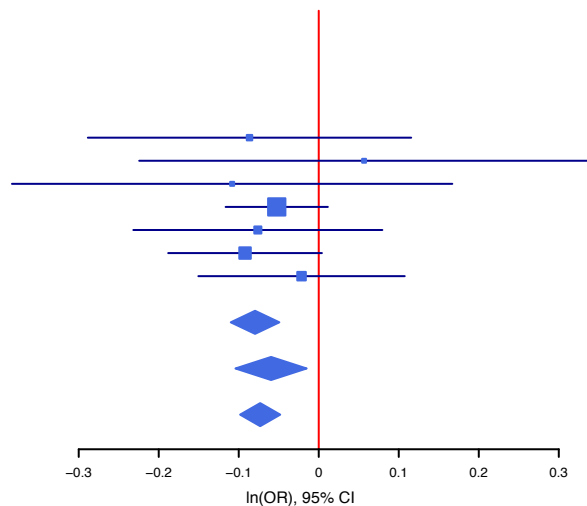

chr10\_111745562\_I I/D 10:111745562  
 het\_P: 0.6 het\_I: 0.0

|                  | info        | p_value        | f_ca(n)            | f_co(n)             | ln(OR)       | STDerr       |
|------------------|-------------|----------------|--------------------|---------------------|--------------|--------------|
| JJ EAST          | 0.85        | 0.11           | 0.19(377)          | 0.17(754)           | 0.16         | 0.13         |
| KFO              | 0.9         | 0.65           | 0.17(252)          | 0.18(288)           | -0.067       | 0.17         |
| NORMENT          | 0.92        | 0.89           | 0.16(313)          | 0.16(4015)          | -0.2         | 0.17         |
| PsychChip        | 0.94        | 0.07           | 0.22(5273)         | 0.19(8286)          | 0.055        | 0.037        |
| TGEN             | 0.94        | 0.23           | 0.18(1049)         | 0.17(685)           | 0.071        | 0.095        |
| DECODE           | 1           | 0.1            | 0.15(791)          | 0.13(118972)        | 0.077        | 0.061        |
| iPSYCH           | 0.9         | 0.2            | 0.16(839)          | 0.15(2938)          | 0.07         | 0.081        |
| <b>Discovery</b> | <b>0.93</b> | <b>4.9e-08</b> | <b>0.18(20352)</b> | <b>0.16(31358)</b>  | <b>0.1</b>   | <b>0.018</b> |
| <b>Follow-up</b> | <b>0.93</b> | <b>0.034</b>   | <b>0.2(8894)</b>   | <b>0.14(135938)</b> | <b>0.057</b> | <b>0.027</b> |
| <b>Combined</b>  | <b>0.93</b> | <b>1.2e-08</b> | <b>0.19(29246)</b> | <b>0.14(167296)</b> | <b>0.086</b> | <b>0.015</b> |

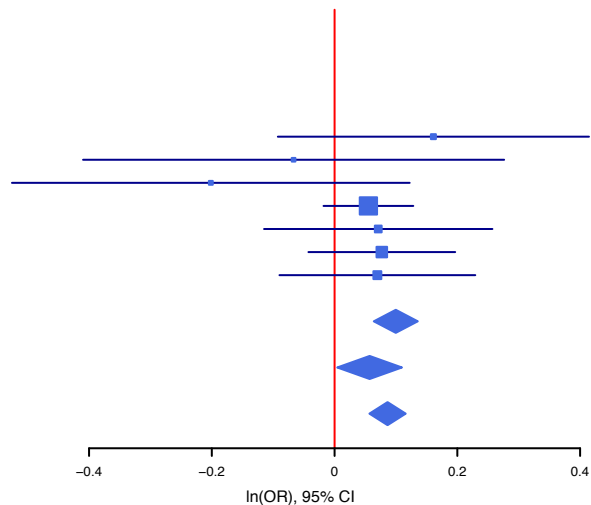

chr5\_7587236\_D IVD 5: 7587236  
 het\_P: 0.1 het\_I: 41.7

|                  | info        | p_value        | f_ca(n)            | f_co(n)             | ln(OR)        | STDerr       |
|------------------|-------------|----------------|--------------------|---------------------|---------------|--------------|
| JJ EAST          | 0.92        | 0.5            | 0.77(377)          | 0.78(754)           | -8e-04        | 0.12         |
| KFO              | 0.96        | 0.0015         | 0.78(252)          | 0.85(288)           | -0.51         | 0.17         |
| NORMENT          | 0.94        | 0.015          | 0.82(313)          | 0.84(4015)          | -0.36         | 0.17         |
| PsychChip        | 0.95        | 0.15           | 0.83(5273)         | 0.83(8286)          | -0.041        | 0.039        |
| TGEN             | 0.9         | 0.26           | 0.82(1049)         | 0.83(685)           | -0.063        | 0.097        |
| DECODE           | 1           | 0.32           | 0.8(791)           | 0.81(118972)        | -0.025        | 0.061        |
| iPSYCH           | 0.96        | 0.16           | 0.81(839)          | 0.82(2938)          | -0.075        | 0.074        |
| <b>Discovery</b> | <b>0.93</b> | <b>1.2e-07</b> | <b>0.81(20352)</b> | <b>0.82(31358)</b>  | <b>-0.095</b> | <b>0.018</b> |
| <b>Follow-up</b> | <b>0.95</b> | <b>0.023</b>   | <b>0.82(8894)</b>  | <b>0.81(135938)</b> | <b>-0.062</b> | <b>0.027</b> |
| <b>Combined</b>  | <b>0.93</b> | <b>1.5e-08</b> | <b>0.81(29246)</b> | <b>0.81(167296)</b> | <b>-0.085</b> | <b>0.015</b> |

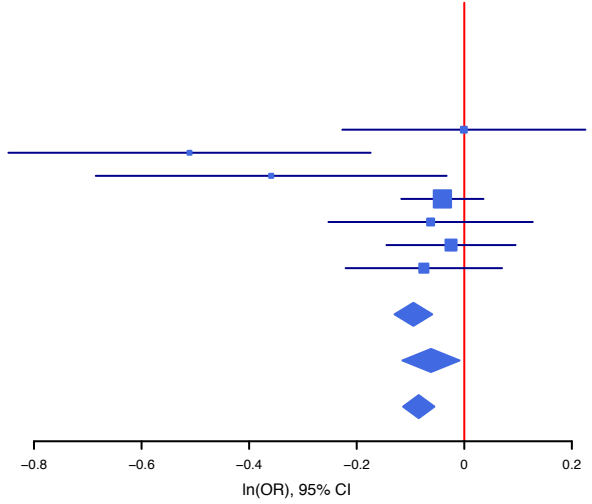

rs10896090

A/G 11: 65945186

het\_P: 0.11 het\_I: 39.7

|                  | info        | p_value        | f_ca(n)            | f_co(n)             | ln(OR)      | STDerr       |
|------------------|-------------|----------------|--------------------|---------------------|-------------|--------------|
| JJ EAST          | 1           | 0.021          | 0.82(377)          | 0.78(754)           | 0.24        | 0.12         |
| KFO              | 0.97        | 0.031          | 0.82(252)          | 0.78(288)           | 0.3         | 0.16         |
| NORMENT          | 0.99        | 0.0077         | 0.86(313)          | 0.83(4015)          | 0.4         | 0.16         |
| PsychChip        | 0.99        | 0.14           | 0.81(5273)         | 0.8(8286)           | 0.038       | 0.036        |
| TGEN             | 0.99        | 0.43           | 0.82(1049)         | 0.82(685)           | 0.015       | 0.091        |
| DECODE           | 1           | 0.1            | 0.83(791)          | 0.82(118972)        | 0.073       | 0.057        |
| iPSYCH           | 1           | 0.62           | 0.82(839)          | 0.82(2938)          | -0.023      | 0.073        |
| <b>Discovery</b> | <b>0.99</b> | <b>2.1e-07</b> | <b>0.82(20352)</b> | <b>0.81(31358)</b>  | <b>0.09</b> | <b>0.017</b> |
| <b>Follow-up</b> | <b>0.99</b> | <b>0.018</b>   | <b>0.82(8894)</b>  | <b>0.82(135938)</b> | <b>0.06</b> | <b>0.025</b> |
| <b>Combined</b>  | <b>0.99</b> | <b>1.9e-08</b> | <b>0.82(29246)</b> | <b>0.82(167296)</b> | <b>0.08</b> | <b>0.014</b> |

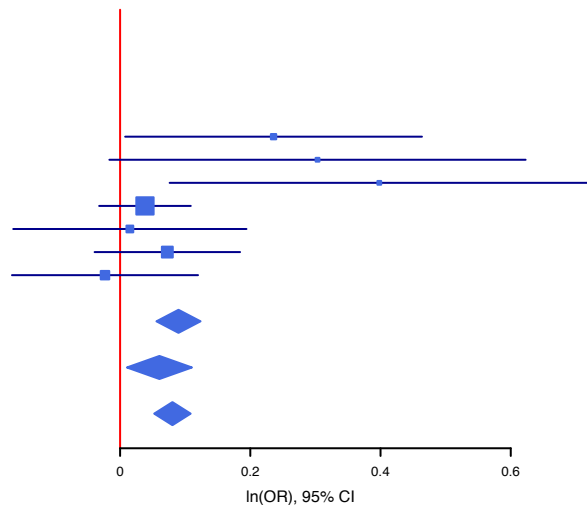

| <b>rs3804640</b> |                | <b>A/G 3:107793709</b> |                    |                     |                    |
|------------------|----------------|------------------------|--------------------|---------------------|--------------------|
|                  |                | het_P:                 | 0.92               | het_I:              | 0.0                |
| <b>info</b>      | <b>p_value</b> | <b>f_ca(n)</b>         | <b>f_co(n)</b>     | <b>ln(OR)</b>       | <b>STDerr</b>      |
| JJ EAST          | 0.99           | 0.31                   | 0.6(377)           | 0.58(754)           | 0.045 0.094        |
| KFO              | 1              | 0.18                   | 0.58(252)          | 0.55(288)           | 0.12 0.13          |
| NORMENT          | 0.98           | 0.64                   | 0.54(313)          | 0.56(4015)          | -0.042 0.12        |
| PsychChip        | 1              | 0.055                  | 0.57(5273)         | 0.55(8286)          | 0.046 0.029        |
| TGEN             | 0.99           | 0.17                   | 0.54(1049)         | 0.52(685)           | 0.066 0.071        |
| DECODE           | 1              | 0.27                   | 0.57(791)          | 0.56(118972)        | 0.026 0.043        |
| iPSYCH           | 1              | 0.2                    | 0.58(839)          | 0.57(2938)          | 0.047 0.056        |
| <b>Discovery</b> | <b>0.99</b>    | <b>9.3e-08</b>         | <b>0.55(20352)</b> | <b>0.53(31358)</b>  | <b>0.072 0.013</b> |
| <b>Follow-up</b> | <b>1</b>       | <b>0.032</b>           | <b>0.57(8894)</b>  | <b>0.56(135938)</b> | <b>0.043 0.02</b>  |
| <b>Combined</b>  | <b>1</b>       | <b>2e-08</b>           | <b>0.56(29246)</b> | <b>0.55(167296)</b> | <b>0.063 0.011</b> |

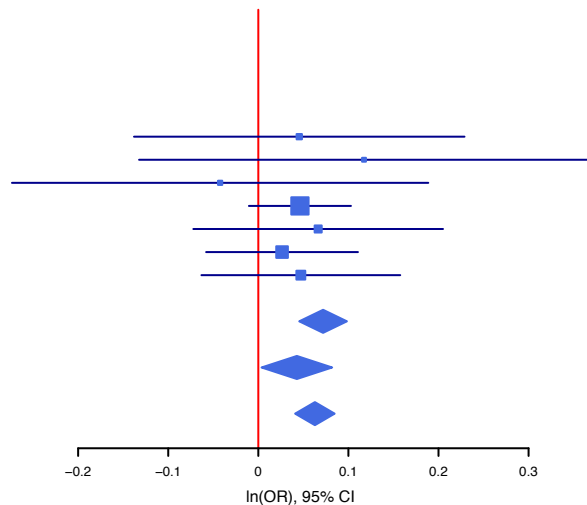

| <b>rs11724116</b> |                | <b>T/C 4:162294038</b> |                    |                     |                     |
|-------------------|----------------|------------------------|--------------------|---------------------|---------------------|
|                   |                | het_P:                 | 0.19               | het_I:              | 29.3                |
| <b>info</b>       | <b>p_value</b> | <b>f_ca(n)</b>         | <b>f_co(n)</b>     | <b>ln(OR)</b>       | <b>STDerr</b>       |
| JJ EAST           | 0.97           | 0.0099                 | 0.16(377)          | 0.19(754)           | -0.29 0.13          |
| KFO               | 1.1            | 0.64                   | 0.17(252)          | 0.16(288)           | 0.061 0.16          |
| NORMENT           | 1              | 0.075                  | 0.17(313)          | 0.17(4015)          | -0.22 0.15          |
| PsychChip         | 1              | 0.13                   | 0.14(5273)         | 0.15(8286)          | -0.046 0.041        |
| TGEN              | 0.96           | 0.12                   | 0.15(1049)         | 0.17(685)           | -0.11 0.098         |
| DECODE            | 1              | 0.47                   | 0.18(791)          | 0.19(118972)        | -0.004 0.048        |
| iPSYCH            | 1              | 0.37                   | 0.18(839)          | 0.19(2938)          | -0.024 0.072        |
| <b>Discovery</b>  | <b>0.97</b>    | <b>3.3e-08</b>         | <b>0.15(20352)</b> | <b>0.16(31358)</b>  | <b>-0.1 0.019</b>   |
| <b>Follow-up</b>  | <b>1</b>       | <b>0.061</b>           | <b>0.15(8894)</b>  | <b>0.19(135938)</b> | <b>-0.049 0.026</b> |
| <b>Combined</b>   | <b>0.98</b>    | <b>2.4e-08</b>         | <b>0.15(29246)</b> | <b>0.18(167296)</b> | <b>-0.085 0.015</b> |

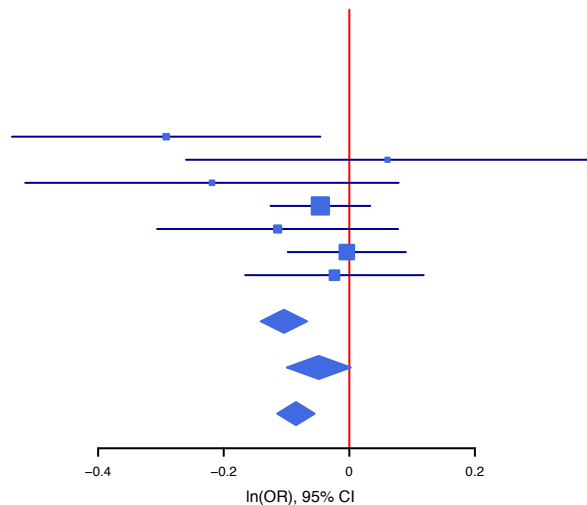

rs112114764

T/G 17: 42201041

het\_P: 0.078 het\_I: 45.2

|                  | info        | p_value        | f_ca(n)            | f_co(n)             | ln(OR)        | STDerr       |
|------------------|-------------|----------------|--------------------|---------------------|---------------|--------------|
| JJ EAST          | 0.94        | 0.14           | 0.59(377)          | 0.62(754)           | -0.1          | 0.097        |
| KFO              | 0.96        | 0.0059         | 0.65(252)          | 0.73(288)           | -0.36         | 0.14         |
| NORMENT          | 0.97        | 0.21           | 0.66(313)          | 0.67(4015)          | -0.1          | 0.13         |
| PsychChip        | 1           | 0.00046        | 0.64(5273)         | 0.67(8286)          | -0.1          | 0.031        |
| TGEN             | 0.96        | 0.35           | 0.68(1049)         | 0.68(685)           | -0.03         | 0.077        |
| DECODE           | 1           | 0.45           | 0.73(791)          | 0.73(118972)        | -0.006        | 0.052        |
| iPSYCH           | 0.98        | 0.9            | 0.72(839)          | 0.7(2938)           | 0.08          | 0.063        |
| <b>Discovery</b> | <b>0.96</b> | <b>1.7e-06</b> | <b>0.67(20352)</b> | <b>0.69(31358)</b>  | <b>-0.07</b>  | <b>0.015</b> |
| <b>Follow-up</b> | <b>1</b>    | <b>0.0042</b>  | <b>0.66(8894)</b>  | <b>0.72(135938)</b> | <b>-0.063</b> | <b>0.022</b> |
| <b>Combined</b>  | <b>0.97</b> | <b>2.5e-08</b> | <b>0.67(29246)</b> | <b>0.72(167296)</b> | <b>-0.068</b> | <b>0.012</b> |

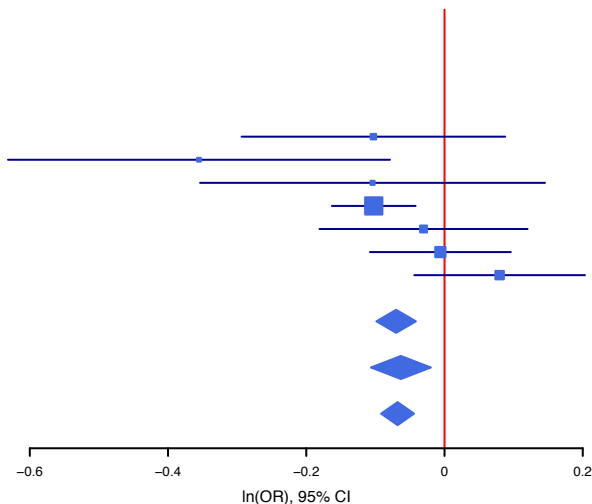



rs10035291      T/C 5: 80796368  
 het\_P:                    0.19    het\_I:    29.5

|                  | info        | p_value        | f_ca(n)            | f_co(n)             | ln(OR)       | STDerr       |
|------------------|-------------|----------------|--------------------|---------------------|--------------|--------------|
| JJ EAST          | 0.89        | 0.17           | 0.7(377)           | 0.69(754)           | 0.099        | 0.11         |
| KFO              | 0.96        | 0.38           | 0.73(252)          | 0.72(288)           | 0.045        | 0.14         |
| NORMENT          | 0.98        | 0.24           | 0.7(313)           | 0.69(4015)          | 0.092        | 0.13         |
| PsychChip        | 0.94        | 0.013          | 0.34(5273)         | 0.34(8286)          | 0.07         | 0.032        |
| TGEN             | 0.97        | 0.33           | 0.68(1049)         | 0.67(685)           | 0.033        | 0.076        |
| DECODE           | 1           | 0.055          | 0.7(791)           | 0.68(118972)        | 0.074        | 0.046        |
| iPSYCH           | 0.94        | 0.97           | 0.66(839)          | 0.68(2938)          | -0.12        | 0.062        |
| <b>Discovery</b> | <b>0.95</b> | <b>1.1e-07</b> | <b>0.69(20352)</b> | <b>0.68(31358)</b>  | <b>0.078</b> | <b>0.015</b> |
| <b>Follow-up</b> | <b>0.95</b> | <b>0.036</b>   | <b>0.48(8894)</b>  | <b>0.66(135938)</b> | <b>0.045</b> | <b>0.022</b> |
| <b>Combined</b>  | <b>0.95</b> | <b>2.7e-08</b> | <b>0.63(29246)</b> | <b>0.66(167296)</b> | <b>0.068</b> | <b>0.012</b> |

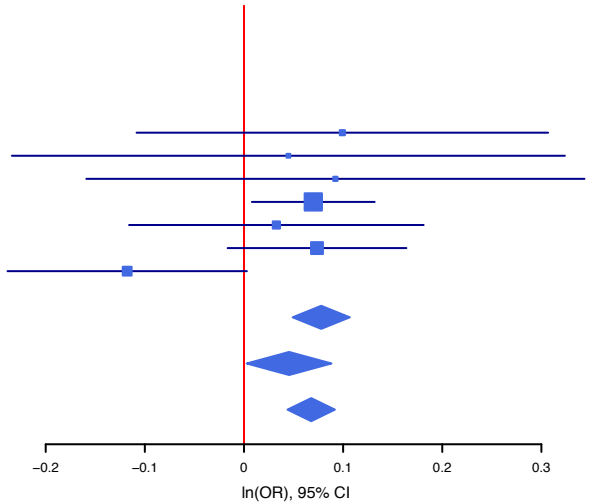

chr15\_85357857\_I

I/D 15: 85357857

het\_P: 0.31 het\_I: 14.8

|                  | info        | p_value        | f_ca(n)            | f_co(n)             | ln(OR)        | STDerr       |
|------------------|-------------|----------------|--------------------|---------------------|---------------|--------------|
| JJ EAST          | 0.99        | 0.49           | 0.23(377)          | 0.24(754)           | -0.0037       | 0.11         |
| KFO              | 1           | 0.88           | 0.3(252)           | 0.28(288)           | 0.16          | 0.14         |
| NORMENT          | 0.94        | 0.58           | 0.74(313)          | 0.73(4015)          | 0.029         | 0.14         |
| PsychChip        | 0.97        | 0.023          | 0.26(5273)         | 0.28(8286)          | -0.065        | 0.033        |
| TGEN             | 1           | 0.25           | 0.26(1049)         | 0.27(685)           | -0.053        | 0.079        |
| DECODE           | 1           | 0.53           | 0.25(791)          | 0.25(118972)        | 0.003         | 0.048        |
| iPSYCH           | 1           | 0.41           | 0.28(839)          | 0.28(2938)          | -0.015        | 0.062        |
| <b>Discovery</b> | <b>0.97</b> | <b>8.5e-09</b> | <b>0.27(20352)</b> | <b>0.28(31358)</b>  | <b>-0.088</b> | <b>0.015</b> |
| <b>Follow-up</b> | <b>0.98</b> | <b>0.16</b>    | <b>0.28(8894)</b>  | <b>0.27(135938)</b> | <b>-0.031</b> | <b>0.022</b> |
| <b>Combined</b>  | <b>0.97</b> | <b>2.7e-08</b> | <b>0.27(29246)</b> | <b>0.27(167296)</b> | <b>-0.07</b>  | <b>0.013</b> |

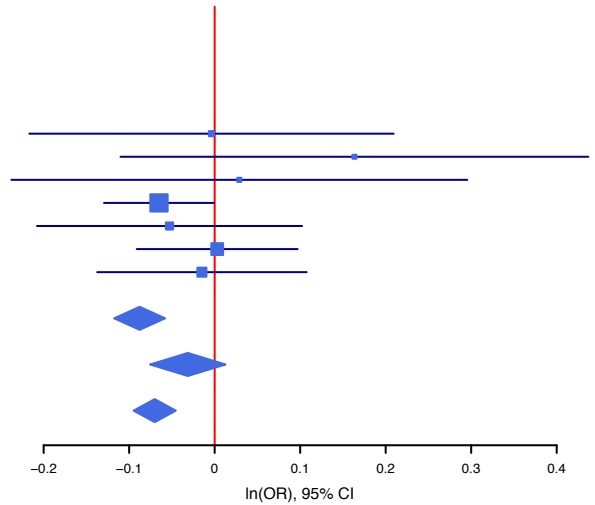

rs6130764

T/C 20: 43750410

het\_P: 0.81 het\_I: 0.0

|                  | info        | p_value        | f_ca(n)            | f_co(n)             | ln(OR)       | STDerr       |
|------------------|-------------|----------------|--------------------|---------------------|--------------|--------------|
| JJ EAST          | 0.95        | 0.48           | 0.61(377)          | 0.61(754)           | 0.0045       | 0.097        |
| KFO              | 0.98        | 0.68           | 0.61(252)          | 0.62(288)           | -0.063       | 0.13         |
| NORMENT          | 1           | 0.25           | 0.59(313)          | 0.56(4015)          | 0.079        | 0.12         |
| PsychChip        | 0.99        | 0.003          | 0.59(5273)         | 0.58(8286)          | 0.08         | 0.029        |
| TGEN             | 0.97        | 0.44           | 0.58(1049)         | 0.57(685)           | 0.011        | 0.072        |
| DECODE           | 1           | 0.16           | 0.55(791)          | 0.53(118972)        | 0.043        | 0.043        |
| iPSYCH           | 0.98        | 0.5            | 0.56(839)          | 0.56(2938)          | -1e-04       | 0.057        |
| <b>Discovery</b> | <b>0.98</b> | <b>5.8e-07</b> | <b>0.59(20352)</b> | <b>0.57(31358)</b>  | <b>0.068</b> | <b>0.014</b> |
| <b>Follow-up</b> | <b>0.99</b> | <b>0.014</b>   | <b>0.58(8894)</b>  | <b>0.54(135938)</b> | <b>0.05</b>  | <b>0.02</b>  |
| <b>Combined</b>  | <b>0.98</b> | <b>3.2e-08</b> | <b>0.59(29246)</b> | <b>0.54(167296)</b> | <b>0.062</b> | <b>0.011</b> |

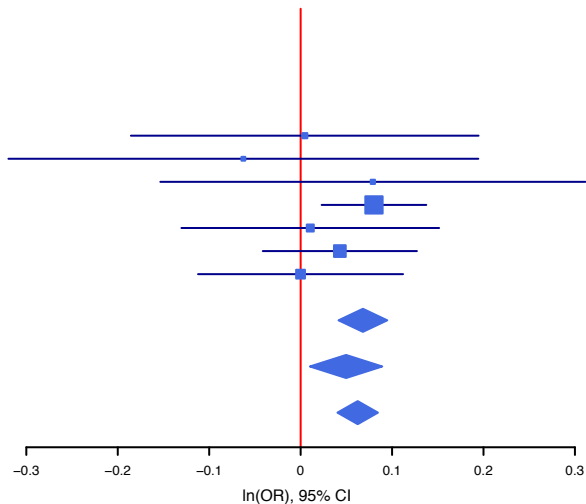

chr6\_72519394\_D D/I 6: 72519394  
 het\_P: 0.89 het\_I: 0.0

|                  | info        | p_value        | f_ca(n)            | f_co(n)             | ln(OR)       | STDerr       |
|------------------|-------------|----------------|--------------------|---------------------|--------------|--------------|
| JJ EAST          | 0.94        | 0.56           | 0.61(377)          | 0.61(754)           | -0.014       | 0.097        |
| KFO              | 0.92        | 0.38           | 0.43(252)          | 0.43(288)           | 0.042        | 0.13         |
| NORMENT          | 0.96        | 0.11           | 0.48(313)          | 0.45(4015)          | 0.15         | 0.12         |
| PsychChip        | 0.96        | 0.0031         | 0.45(5273)         | 0.44(8286)          | 0.081        | 0.029        |
| TGEN             | 0.95        | 0.11           | 0.44(1049)         | 0.43(685)           | 0.09         | 0.073        |
| DECODE           | 1           | 0.17           | 0.52(791)          | 0.5(118972)         | 0.041        | 0.043        |
| iPSYCH           | 0.96        | 0.47           | 0.45(839)          | 0.45(2938)          | 0.0048       | 0.058        |
| <b>Discovery</b> | <b>0.97</b> | <b>3.1e-06</b> | <b>0.46(20352)</b> | <b>0.44(31358)</b>  | <b>0.064</b> | <b>0.014</b> |
| <b>Follow-up</b> | <b>0.97</b> | <b>0.0033</b>  | <b>0.46(8894)</b>  | <b>0.49(135938)</b> | <b>0.06</b>  | <b>0.02</b>  |
| <b>Combined</b>  | <b>0.97</b> | <b>3.5e-08</b> | <b>0.46(29246)</b> | <b>0.48(167296)</b> | <b>0.062</b> | <b>0.011</b> |

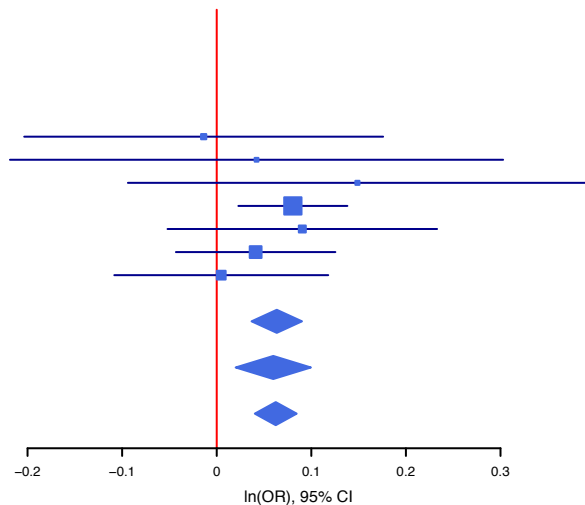

rs11557713

A/G 18: 60243876

het\_P: 0.93 het\_I: 0.0

|                  | info        | p_value        | f_ca(n)           | f_co(n)             | ln(OR)       | STDerr       |
|------------------|-------------|----------------|-------------------|---------------------|--------------|--------------|
| JJ EAST          | 1           | 0.34           | 0.29(377)         | 0.28(754)           | 0.041        | 0.1          |
| KFO              | 1           | 0.44           | 0.29(252)         | 0.28(288)           | 0.02         | 0.14         |
| NORMENT          | 1           | 0.14           | 0.31(313)         | 0.29(4015)          | 0.14         | 0.13         |
| PsychChip        | 0.98        | 0.019          | 0.31(5273)        | 0.31(8286)          | 0.065        | 0.031        |
| TGEN             | 0.98        | 0.085          | 0.32(1049)        | 0.3(685)            | 0.11         | 0.077        |
| DECODE           | 1           | 0.38           | 0.32(791)         | 0.32(118972)        | 0.013        | 0.044        |
| iPSYCH           | 0.99        | 0.1            | 0.29(839)         | 0.28(2938)          | 0.079        | 0.062        |
| <b>Discovery</b> | <b>0.97</b> | <b>1.2e-06</b> | <b>0.3(20352)</b> | <b>0.28(31358)</b>  | <b>0.072</b> | <b>0.015</b> |
| <b>Follow-up</b> | <b>0.99</b> | <b>0.0077</b>  | <b>0.31(8894)</b> | <b>0.32(135938)</b> | <b>0.057</b> | <b>0.021</b> |
| <b>Combined</b>  | <b>0.98</b> | <b>3.6e-08</b> | <b>0.3(29246)</b> | <b>0.31(167296)</b> | <b>0.067</b> | <b>0.012</b> |

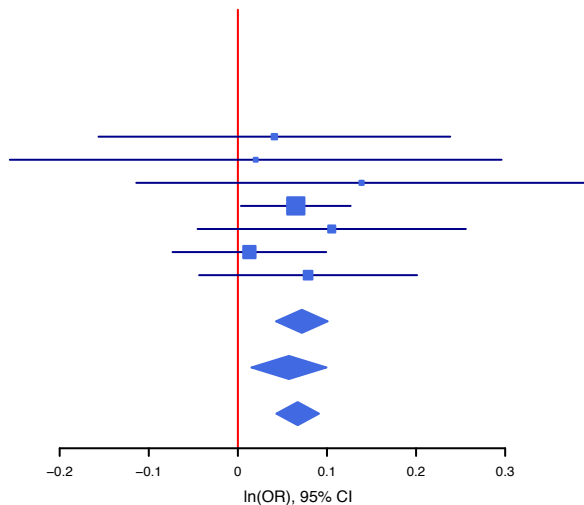

| rs7122539        |             | A/G 11: 66662731 |                    | het_P:              | 0.096         | het_I:       | 42.4 |
|------------------|-------------|------------------|--------------------|---------------------|---------------|--------------|------|
| info             | p_value     | f_ca(n)          | f_co(n)            | ln(OR)              | STDerr        |              |      |
| JJ EAST          | 0.98        | 0.0056           | 0.35(377)          | 0.41(754)           | -0.24         | 0.096        |      |
| KFO              | 0.97        | 0.43             | 0.36(252)          | 0.36(288)           | -0.025        | 0.13         |      |
| NORMENT          | 0.98        | 0.03             | 0.31(313)          | 0.35(4015)          | -0.24         | 0.13         |      |
| PsychChip        | 1           | 0.33             | 0.34(5273)         | 0.34(8286)          | -0.013        | 0.03         |      |
| TGEN             | 1           | 0.071            | 0.34(1049)         | 0.36(685)           | -0.11         | 0.074        |      |
| DECODE           | 1           | 0.048            | 0.31(791)          | 0.33(118972)        | -0.076        | 0.045        |      |
| iPSYCH           | 0.99        | 0.74             | 0.35(839)          | 0.34(2938)          | 0.038         | 0.059        |      |
| <b>Discovery</b> | <b>0.99</b> | <b>2.2e-07</b>   | <b>0.33(20352)</b> | <b>0.35(31358)</b>  | <b>-0.073</b> | <b>0.014</b> |      |
| <b>Follow-up</b> | <b>1</b>    | <b>0.03</b>      | <b>0.34(8894)</b>  | <b>0.33(135938)</b> | <b>-0.045</b> | <b>0.021</b> |      |
| <b>Combined</b>  | <b>0.99</b> | <b>3.8e-08</b>   | <b>0.33(29246)</b> | <b>0.34(167296)</b> | <b>-0.065</b> | <b>0.012</b> |      |

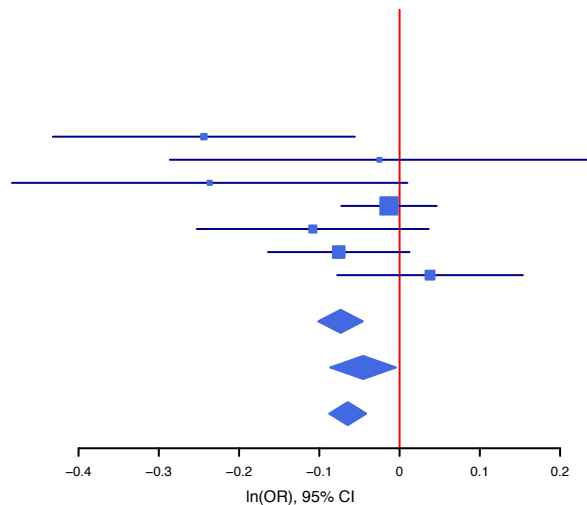

| rs10455979       |             | C/G            |                    | 6:166995260         |               |              |
|------------------|-------------|----------------|--------------------|---------------------|---------------|--------------|
|                  |             | het_P:         | 0.47               | het_I:              | 0.0           |              |
|                  | info        | p_value        | f_ca(n)            | f_co(n)             | ln(OR)        | STDerr       |
| JJ EAST          | 0.99        | 0.22           | 0.52(377)          | 0.55(754)           | -0.073        | 0.093        |
| KFO              | 0.95        | 0.22           | 0.53(252)          | 0.56(288)           | -0.1          | 0.13         |
| NORMENT          | 0.98        | 0.46           | 0.51(313)          | 0.52(4015)          | -0.011        | 0.11         |
| PsychChip        | 0.96        | 0.36           | 0.51(5273)         | 0.52(8286)          | -0.011        | 0.029        |
| TGEN             | 0.93        | 0.034          | 0.51(1049)         | 0.54(685)           | -0.13         | 0.073        |
| DECODE           | 0.99        | 0.38           | 0.47(791)          | 0.48(118972)        | -0.013        | 0.044        |
| iPSYCH           | 0.99        | 0.09           | 0.52(839)          | 0.54(2938)          | -0.076        | 0.057        |
| <b>Discovery</b> | <b>0.95</b> | <b>4.6e-08</b> | <b>0.52(20352)</b> | <b>0.53(31358)</b>  | <b>-0.075</b> | <b>0.014</b> |
| <b>Follow-up</b> | <b>0.97</b> | <b>0.092</b>   | <b>0.51(8894)</b>  | <b>0.49(135938)</b> | <b>-0.034</b> | <b>0.02</b>  |
| <b>Combined</b>  | <b>0.96</b> | <b>4.3e-08</b> | <b>0.52(29246)</b> | <b>0.49(167296)</b> | <b>-0.062</b> | <b>0.011</b> |

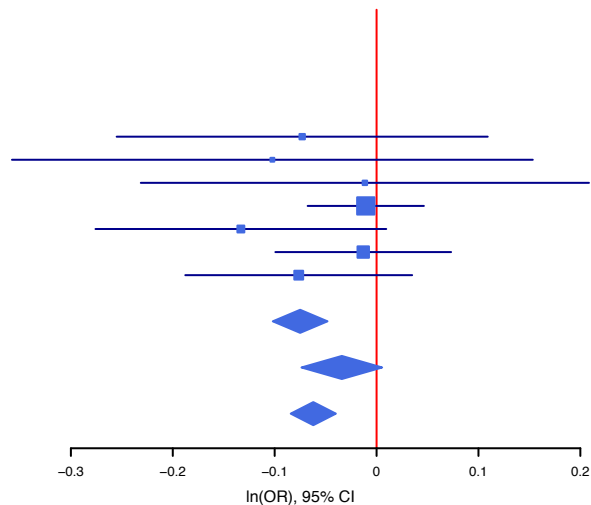

rs7544145            T/C 1:150138699  
                           het\_P:            0.3    het\_I:    16.1

|                  | info        | p_value        | f_ca(n)            | f_co(n)             | ln(OR)       | STDerr       |
|------------------|-------------|----------------|--------------------|---------------------|--------------|--------------|
| JJ EAST          | 0.99        | 0.054          | 0.85(377)          | 0.82(754)           | 0.2          | 0.13         |
| KFO              | 0.93        | 0.67           | 0.82(252)          | 0.83(288)           | -0.075       | 0.17         |
| NORMENT          | 0.94        | 0.2            | 0.81(313)          | 0.8(4015)           | 0.12         | 0.15         |
| PsychChip        | 0.92        | 0.084          | 0.18(5273)         | 0.18(8286)          | 0.054        | 0.039        |
| TGEN             | 0.96        | 0.43           | 0.82(1049)         | 0.82(685)           | 0.017        | 0.093        |
| DECODE           | 1           | 0.0035         | 0.83(791)          | 0.8(118972)         | 0.15         | 0.058        |
| iPSYCH           | 0.94        | 0.81           | 0.81(839)          | 0.82(2938)          | -0.065       | 0.075        |
| <b>Discovery</b> | <b>0.93</b> | <b>4.8e-07</b> | <b>0.82(20352)</b> | <b>0.81(31358)</b>  | <b>0.091</b> | <b>0.018</b> |
| <b>Follow-up</b> | <b>0.94</b> | <b>0.021</b>   | <b>0.44(8894)</b>  | <b>0.76(135938)</b> | <b>0.062</b> | <b>0.027</b> |
| <b>Combined</b>  | <b>0.93</b> | <b>4.8e-08</b> | <b>0.7(29246)</b>  | <b>0.77(167296)</b> | <b>0.082</b> | <b>0.015</b> |

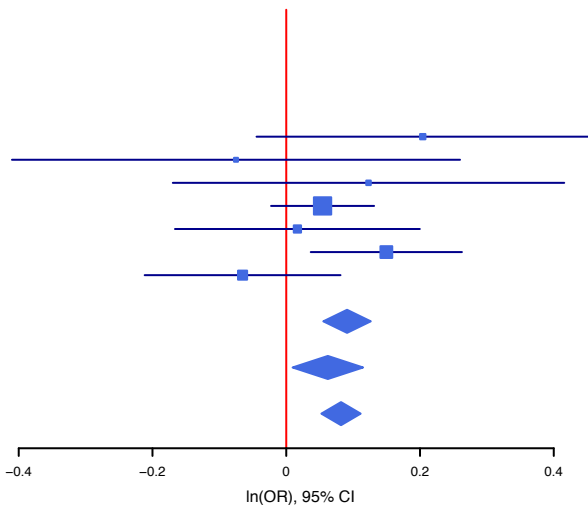

Supplement: NIHMS1524328-supplement-5.pdf [file NIHMS1524328-supplement-5.pdf]
